# Supplementary material for: Evidence for rangewide panmixia despite multiple barriers to dispersal in a marine mussel
Source: PubMed Central journal article supplement (PMC5579014; doi:10.1038/s41598-017-10753-9), 2017-08-31
Supplement: 41598_2017_10753_MOESM1_ESM.pdf [file 41598_2017_10753_MOESM1_ESM.pdf]

## Evidence for rangewide panmixia despite barriers to dispersal in a marine mussel

*Scientific Reports*

*Supplementary information*

Carla R. Lourenço<sup>\*1,2</sup>, Katy R. Nicastro<sup>1</sup>, Christopher D. McQuaid<sup>2</sup>, Rosa M. Chefaoui<sup>1</sup>, Jorge Assis<sup>1</sup>, Mohammed Z. Taleb<sup>3</sup>, Gerardo I. Zardi<sup>2</sup>

<sup>1</sup>CCMAR-CIMAR – Associated Laboratory, University of Algarve, Campus de Gambelas, Faro 8005-139, Portugal

<sup>2</sup>Department of Zoology and Entomology, Rhodes University, Grahamstown 6140, South Africa

<sup>3</sup>Department of Biology, Faculty of Natural and Life Sciences, University of Oran Ahmed Ben Bella, 31000 Oran, Algeria

\*Correspondence: Carla R. Lourenço, CCMAR-CIMAR – Associated Laboratory, University of Algarve, Campus de Gambelas, Faro 8005-139, Portugal.

E-mail: [carla.rodriques.lourenco@gmail.com](mailto:carla.rodriques.lourenco@gmail.com)

Table S1 - Pairwise  $\phi_{ST}$  comparison of *Perna perna* populations. All P-values were corrected and non-significant. Locations codes as in Table S6.

|    | KR | BZ    | AN    | PN    | CG    | BM    | AM    | LA    | TG    | LP    | AT    | PM    | TV    | VL    | SG    | LR    | RB    | CB    | SB    | EB    | ES    | IM    | ML    | TT    | BJ    | LB    | DK    |
|----|----|-------|-------|-------|-------|-------|-------|-------|-------|-------|-------|-------|-------|-------|-------|-------|-------|-------|-------|-------|-------|-------|-------|-------|-------|-------|-------|
| KR | -  | 0.000 | 0.008 | 0.000 | 0.000 | 0.000 | 0.025 | 0.000 | 0.013 | 0.195 | 0.017 | 0.027 | 0.000 | 0.000 | 0.127 | 0.000 | 0.000 | 0.000 | 0.000 | 0.011 | 0.013 | 0.030 | 0.000 | 0.014 | 0.029 | 0.000 | 0.000 |
| BZ |    | -     | 0.000 | 0.000 | 0.000 | 0.000 | 0.006 | 0.000 | 0.000 | 0.115 | 0.000 | 0.002 | 0.000 | 0.000 | 0.121 | 0.000 | 0.000 | 0.000 | 0.000 | 0.000 | 0.008 | 0.000 | 0.000 | 0.000 | 0.000 | 0.000 | 0.000 |
| AN |    |       | -     | 0.000 | 0.000 | 0.000 | 0.026 | 0.006 | 0.000 | 0.216 | 0.014 | 0.058 | 0.029 | 0.015 | 0.256 | 0.020 | 0.000 | 0.002 | 0.000 | 0.011 | 0.054 | 0.019 | 0.026 | 0.020 | 0.026 | 0.000 | 0.000 |
| PN |    |       |       | -     | 0.000 | 0.000 | 0.000 | 0.000 | 0.000 | 0.114 | 0.000 | 0.000 | 0.000 | 0.000 | 0.155 | 0.002 | 0.000 | 0.000 | 0.000 | 0.000 | 0.004 | 0.000 | 0.000 | 0.000 | 0.000 | 0.000 | 0.002 |
| CG |    |       |       |       | -     | 0.000 | 0.006 | 0.000 | 0.000 | 0.082 | 0.008 | 0.085 | 0.000 | 0.014 | 0.236 | 0.017 | 0.000 | 0.000 | 0.000 | 0.024 | 0.037 | 0.043 | 0.003 | 0.026 | 0.040 | 0.000 | 0.000 |
| BM |    |       |       |       |       | -     | 0.020 | 0.001 | 0.000 | 0.219 | 0.004 | 0.025 | 0.018 | 0.002 | 0.219 | 0.007 | 0.000 | 0.000 | 0.000 | 0.002 | 0.033 | 0.005 | 0.014 | 0.006 | 0.010 | 0.000 | 0.000 |
| AM |    |       |       |       |       |       | -     | 0.000 | 0.009 | 0.153 | 0.000 | 0.012 | 0.000 | 0.013 | 0.255 | 0.018 | 0.000 | 0.000 | 0.000 | 0.002 | 0.000 | 0.015 | 0.000 | 0.000 | 0.000 | 0.022 | 0.037 |
| LA |    |       |       |       |       |       |       | -     | 0.000 | 0.039 | 0.000 | 0.014 | 0.000 | 0.000 | 0.127 | 0.000 | 0.000 | 0.000 | 0.000 | 0.001 | 0.000 | 0.017 | 0.000 | 0.000 | 0.004 | 0.000 | 0.000 |
| TG |    |       |       |       |       |       |       |       | -     | 0.142 | 0.000 | 0.046 | 0.013 | 0.020 | 0.234 | 0.025 | 0.000 | 0.000 | 0.000 | 0.012 | 0.032 | 0.011 | 0.015 | 0.002 | 0.016 | 0.000 | 0.012 |
| LP |    |       |       |       |       |       |       |       |       | -     | 0.252 | 0.432 | 0.063 | 0.212 | 0.201 | 0.087 | 0.156 | 0.197 | 0.092 | 0.225 | 0.167 | 0.390 | 0.128 | 0.225 | 0.350 | 0.229 | 0.158 |
| AT |    |       |       |       |       |       |       |       |       |       | -     | 0.005 | 0.000 | 0.000 | 0.300 | 0.008 | 0.000 | 0.000 | 0.000 | 0.000 | 0.000 | 0.000 | 0.000 | 0.000 | 0.000 | 0.005 | 0.026 |
| PM |    |       |       |       |       |       |       |       |       |       |       | -     | 0.014 | 0.000 | 0.324 | 0.000 | 0.005 | 0.003 | 0.008 | 0.000 | 0.000 | 0.005 | 0.006 | 0.000 | 0.000 | 0.026 | 0.044 |
| TV |    |       |       |       |       |       |       |       |       |       |       |       | -     | 0.000 | 0.113 | 0.000 | 0.000 | 0.000 | 0.000 | 0.006 | 0.000 | 0.031 | 0.000 | 0.003 | 0.015 | 0.010 | 0.008 |
| VL |    |       |       |       |       |       |       |       |       |       |       |       |       | -     | 0.138 | 0.000 | 0.000 | 0.000 | 0.000 | 0.000 | 0.000 | 0.006 | 0.000 | 0.000 | 0.006 | 0.000 | 0.000 |
| SG |    |       |       |       |       |       |       |       |       |       |       |       |       |       | -     | 0.048 | 0.192 | 0.189 | 0.146 | 0.210 | 0.172 | 0.349 | 0.177 | 0.217 | 0.332 | 0.196 | 0.113 |
| LR |    |       |       |       |       |       |       |       |       |       |       |       |       |       |       | -     | 0.000 | 0.000 | 0.000 | 0.001 | 0.000 | 0.013 | 0.000 | 0.004 | 0.012 | 0.000 | 0.000 |
| RB |    |       |       |       |       |       |       |       |       |       |       |       |       |       |       |       | -     | 0.000 | 0.000 | 0.000 | 0.006 | 0.000 | 0.000 | 0.000 | 0.000 | 0.000 | 0.003 |
| CB |    |       |       |       |       |       |       |       |       |       |       |       |       |       |       |       |       | -     | 0.000 | 0.000 | 0.000 | 0.000 | 0.000 | 0.000 | 0.000 | 0.000 | 0.000 |
| SB |    |       |       |       |       |       |       |       |       |       |       |       |       |       |       |       |       |       | -     | 0.000 | 0.001 | 0.006 | 0.000 | 0.000 | 0.000 | 0.000 | 0.002 |
| EB |    |       |       |       |       |       |       |       |       |       |       |       |       |       |       |       |       |       |       | -     | 0.005 | 0.000 | 0.000 | 0.000 | 0.000 | 0.002 | 0.020 |
| ES |    |       |       |       |       |       |       |       |       |       |       |       |       |       |       |       |       |       |       |       | -     | 0.028 | 0.000 | 0.000 | 0.005 | 0.028 | 0.031 |
| IM |    |       |       |       |       |       |       |       |       |       |       |       |       |       |       |       |       |       |       |       |       | -     | 0.020 | 0.000 | 0.000 | 0.009 | 0.038 |
| ML |    |       |       |       |       |       |       |       |       |       |       |       |       |       |       |       |       |       |       |       |       |       | -     | 0.001 | 0.005 | 0.011 | 0.013 |
| TT |    |       |       |       |       |       |       |       |       |       |       |       |       |       |       |       |       |       |       |       |       |       |       | -     | 0.000 | 0.006 | 0.027 |
| BJ |    |       |       |       |       |       |       |       |       |       |       |       |       |       |       |       |       |       |       |       |       |       |       |       | -     | 0.015 | 0.041 |
| LB |    |       |       |       |       |       |       |       |       |       |       |       |       |       |       |       |       |       |       |       |       |       |       |       |       | -     | 0.000 |
| DK |    |       |       |       |       |       |       |       |       |       |       |       |       |       |       |       |       |       |       |       |       |       |       |       |       |       | -     |

Table S2 – a) Pairwise  $F_{ST}$  (above) and Jost's  $D_{ST}$  (below) comparisons of *P. perna* populations. Locations codes as in Table S6.

| a) | KR    | BZ    | OR    | PN    | CG    | BM    | AM    | LA    | TG    | LP    | AT    | PM    | TV    | VL    | SG    | LR    | RB    | CB    | SB    | EB    | ES    | IM    | ML    | TT    | BJ    | LB    | DK    |
|----|-------|-------|-------|-------|-------|-------|-------|-------|-------|-------|-------|-------|-------|-------|-------|-------|-------|-------|-------|-------|-------|-------|-------|-------|-------|-------|-------|
| KR |       | 0.000 | 0.001 | 0.001 | 0.000 | 0.000 | 0.001 | 0.000 | 0.000 | 0.000 | 0.000 | 0.000 | 0.001 | 0.000 | 0.021 | 0.000 | 0.000 | 0.000 | 0.002 | 0.000 | 0.000 | 0.004 | 0.004 | 0.000 | 0.001 | 0.000 | 0.000 |
| BZ | 0.000 |       | 0.000 | 0.003 | 0.000 | 0.000 | 0.000 | 0.000 | 0.002 | 0.000 | 0.000 | 0.000 | 0.000 | 0.000 | 0.019 | 0.000 | 0.000 | 0.001 | 0.000 | 0.000 | 0.000 | 0.000 | 0.000 | 0.000 | 0.000 | 0.000 | 0.000 |
| OR | 0.001 | 0.004 |       | 0.000 | 0.000 | 0.000 | 0.000 | 0.000 | 0.000 | 0.000 | 0.000 | 0.000 | 0.009 | 0.000 | 0.006 | 0.001 | 0.000 | 0.000 | 0.000 | 0.000 | 0.000 | 0.003 | 0.006 | 0.003 | 0.002 | 0.000 | 0.000 |
| PN | 0.007 | 0.016 | 0.002 |       | 0.000 | 0.001 | 0.000 | 0.000 | 0.001 | 0.000 | 0.000 | 0.006 | 0.011 | 0.001 | 0.012 | 0.002 | 0.003 | 0.000 | 0.009 | 0.004 | 0.001 | 0.010 | 0.011 | 0.003 | 0.006 | 0.003 | 0.000 |
| CG | 0.005 | 0.000 | 0.000 | 0.003 |       | 0.000 | 0.000 | 0.000 | 0.000 | 0.000 | 0.000 | 0.000 | 0.000 | 0.000 | 0.012 | 0.000 | 0.000 | 0.000 | 0.000 | 0.000 | 0.000 | 0.000 | 0.000 | 0.000 | 0.000 | 0.000 | 0.000 |
| BM | 0.000 | 0.000 | 0.000 | 0.005 | 0.001 |       | 0.000 | 0.000 | 0.000 | 0.000 | 0.000 | 0.000 | 0.004 | 0.000 | 0.005 | 0.000 | 0.000 | 0.000 | 0.000 | 0.000 | 0.000 | 0.000 | 0.001 | 0.000 | 0.007 | 0.000 | 0.000 |
| AM | 0.000 | 0.000 | 0.002 | 0.001 | 0.001 | 0.000 |       | 0.000 | 0.002 | 0.000 | 0.000 | 0.000 | 0.000 | 0.000 | 0.005 | 0.000 | 0.000 | 0.000 | 0.001 | 0.002 | 0.000 | 0.001 | 0.000 | 0.000 | 0.005 | 0.000 | 0.000 |
| LA | 0.000 | 0.000 | 0.000 | 0.000 | 0.001 | 0.000 | 0.000 |       | 0.000 | 0.000 | 0.000 | 0.000 | 0.004 | 0.000 | 0.005 | 0.000 | 0.000 | 0.000 | 0.000 | 0.000 | 0.000 | 0.001 | 0.000 | 0.000 | 0.002 | 0.000 | 0.000 |
| TG | 0.000 | 0.000 | 0.000 | 0.004 | 0.003 | 0.000 | 0.000 | 0.000 |       | 0.000 | 0.003 | 0.003 | 0.005 | 0.000 | 0.021 | 0.000 | 0.004 | 0.001 | 0.001 | 0.000 | 0.000 | 0.007 | 0.004 | 0.001 | 0.001 | 0.000 | 0.002 |
| LP | 0.000 | 0.000 | 0.000 | 0.000 | 0.000 | 0.000 | 0.000 | 0.000 | 0.000 |       | 0.000 | 0.000 | 0.000 | 0.000 | 0.000 | 0.000 | 0.000 | 0.000 | 0.000 | 0.000 | 0.000 | 0.000 | 0.000 | 0.000 | 0.000 | 0.000 | 0.000 |
| AT | 0.000 | 0.000 | 0.000 | 0.000 | 0.000 | 0.000 | 0.000 | 0.000 | 0.000 | 0.000 |       | 0.000 | 0.002 | 0.000 | 0.008 | 0.000 | 0.000 | 0.000 | 0.003 | 0.000 | 0.002 | 0.000 | 0.002 | 0.000 | 0.007 | 0.000 | 0.000 |
| PM | 0.000 | 0.000 | 0.001 | 0.002 | 0.002 | 0.000 | 0.000 | 0.001 | 0.003 | 0.000 | 0.000 |       | 0.000 | 0.000 | 0.024 | 0.000 | 0.000 | 0.005 | 0.000 | 0.000 | 0.000 | 0.000 | 0.000 | 0.000 | 0.000 | 0.000 | 0.000 |
| TV | 0.001 | 0.000 | 0.013 | 0.039 | 0.003 | 0.003 | 0.001 | 0.006 | 0.019 | 0.000 | 0.000 | 0.007 |       | 0.000 | 0.027 | 0.000 | 0.002 | 0.003 | 0.006 | 0.009 | 0.002 | 0.003 | 0.000 | 0.000 | 0.001 | 0.000 | 0.007 |
| VL | 0.000 | 0.000 | 0.004 | 0.001 | 0.007 | 0.000 | 0.000 | 0.000 | 0.000 | 0.000 | 0.000 | 0.000 | 0.000 |       | 0.024 | 0.000 | 0.000 | 0.000 | 0.001 | 0.000 | 0.000 | 0.004 | 0.000 | 0.000 | 0.000 | 0.000 | 0.001 |
| SG | 0.001 | 0.000 | 0.001 | 0.008 | 0.001 | 0.000 | 0.000 | 0.000 | 0.000 | 0.000 | 0.000 | 0.006 | 0.000 | 0.008 |       | 0.009 | 0.009 | 0.000 | 0.003 | 0.010 | 0.018 | 0.025 | 0.024 | 0.018 | 0.034 | 0.021 | 0.011 |
| LR | 0.000 | 0.001 | 0.000 | 0.004 | 0.000 | 0.000 | 0.000 | 0.000 | 0.001 | 0.000 | 0.000 | 0.000 | 0.002 | 0.000 | 0.000 |       | 0.000 | 0.000 | 0.000 | 0.000 | 0.001 | 0.001 | 0.000 | 0.000 | 0.002 | 0.000 | 0.000 |
| RB | 0.001 | 0.000 | 0.001 | 0.014 | 0.000 | 0.000 | 0.000 | 0.000 | 0.005 | 0.000 | 0.000 | 0.005 | 0.000 | 0.007 | 0.000 | 0.001 |       | 0.000 | 0.001 | 0.000 | 0.000 | 0.000 | 0.000 | 0.000 | 0.003 | 0.000 | 0.000 |
| CB | 0.000 | 0.003 | 0.001 | 0.009 | 0.002 | 0.000 | 0.000 | 0.000 | 0.000 | 0.000 | 0.000 | 0.001 | 0.003 | 0.000 | 0.000 | 0.000 | 0.000 |       | 0.005 | 0.001 | 0.003 | 0.007 | 0.005 | 0.000 | 0.007 | 0.000 | 0.000 |
| SB | 0.003 | 0.001 | 0.004 | 0.010 | 0.000 | 0.002 | 0.011 | 0.000 | 0.000 | 0.000 | 0.000 | 0.002 | 0.028 | 0.000 | 0.000 | 0.000 | 0.008 | 0.015 |       | 0.000 | 0.000 | 0.001 | 0.000 | 0.000 | 0.000 | 0.000 | 0.003 |
| EB | 0.002 | 0.004 | 0.000 | 0.017 | 0.006 | 0.001 | 0.006 | 0.000 | 0.000 | 0.000 | 0.000 | 0.003 | 0.041 | 0.003 | 0.003 | 0.002 | 0.000 | 0.006 | 0.000 |       | 0.002 | 0.001 | 0.001 | 0.000 | 0.005 | 0.000 | 0.000 |
| ES | 0.001 | 0.000 | 0.000 | 0.000 | 0.000 | 0.000 | 0.000 | 0.000 | 0.000 | 0.000 | 0.000 | 0.000 | 0.007 | 0.000 | 0.000 | 0.000 | 0.000 | 0.001 | 0.000 | 0.002 |       | 0.003 | 0.001 | 0.001 | 0.000 | 0.000 | 0.000 |
| IM | 0.002 | 0.001 | 0.003 | 0.026 | 0.002 | 0.000 | 0.007 | 0.001 | 0.008 | 0.000 | 0.000 | 0.000 | 0.002 | 0.013 | 0.002 | 0.002 | 0.000 | 0.009 | 0.006 | 0.005 | 0.012 |       | 0.000 | 0.000 | 0.007 | 0.000 | 0.003 |
| ML | 0.004 | 0.000 | 0.015 | 0.007 | 0.002 | 0.000 | 0.000 | 0.000 | 0.000 | 0.000 | 0.000 | 0.000 | 0.000 | 0.000 | 0.009 | 0.000 | 0.003 | 0.006 | 0.000 | 0.004 | 0.000 | 0.003 |       | 0.000 | 0.004 | 0.000 | 0.002 |
| TT | 0.000 | 0.000 | 0.007 | 0.000 | 0.001 | 0.000 | 0.000 | 0.000 | 0.000 | 0.000 | 0.000 | 0.000 | 0.004 | 0.004 | 0.000 | 0.000 | 0.000 | 0.001 | 0.000 | 0.007 | 0.006 | 0.000 | 0.000 |       | 0.003 | 0.000 | 0.000 |
| BJ | 0.005 | 0.002 | 0.000 | 0.014 | 0.002 | 0.012 | 0.012 | 0.004 | 0.006 | 0.000 | 0.003 | 0.004 | 0.009 | 0.004 | 0.008 | 0.002 | 0.006 | 0.010 | 0.001 | 0.013 | 0.001 | 0.016 | 0.016 | 0.010 |       | 0.000 | 0.006 |
| LB | 0.000 | 0.001 | 0.000 | 0.014 | 0.000 | 0.000 | 0.000 | 0.000 | 0.000 | 0.000 | 0.000 | 0.002 | 0.002 | 0.000 | 0.005 | 0.000 | 0.000 | 0.000 | 0.003 | 0.000 | 0.000 | 0.001 | 0.003 | 0.000 | 0.000 |       | 0.000 |
| DK | 0.002 | 0.001 | 0.002 | 0.004 | 0.001 | 0.000 | 0.000 | 0.000 | 0.000 | 0.000 | 0.000 | 0.000 | 0.027 | 0.002 | 0.002 | 0.005 | 0.001 | 0.001 | 0.000 | 0.000 | 0.000 | 0.010 | 0.002 | 0.000 | 0.015 | 0.001 |       |

Table S2 – b) 95% Confidence intervals of pairwise  $F_{ST}$  (above) and Jost's Dest (below) comparisons of *P. perna* populations. Locations codes as in Table S6.

|    | KR                 | BZ                 | OR                 | PN                 | CG                 | BM                 | AM                 | LA                 | TG                 | LP                 | AT                 | PM                 | TV                 | VL                 | SG                 | LR                 | RB                 | CB                 | SB                 | EB                 | ES                 | IM                 | ML                 | TT                 | BJ                 | LB                 | DK                 |
|----|--------------------|--------------------|--------------------|--------------------|--------------------|--------------------|--------------------|--------------------|--------------------|--------------------|--------------------|--------------------|--------------------|--------------------|--------------------|--------------------|--------------------|--------------------|--------------------|--------------------|--------------------|--------------------|--------------------|--------------------|--------------------|--------------------|--------------------|
| KR |                    | (-0.014<br>-0.012) | (-0.013<br>-0.022) | (-0.011<br>-0.017) | (-0.021<br>-0.021) | (-0.010<br>-0.014) | (-0.010<br>-0.015) | (-0.014<br>-0.010) | (-0.013<br>-0.009) | (-0.009<br>-0.076) | (-0.013<br>-0.016) | (-0.016<br>-0.019) | (-0.011<br>-0.015) | (-0.014<br>-0.011) | (-0.031<br>-0.100) | (-0.015<br>-0.009) | (-0.011<br>-0.015) | (-0.013<br>-0.014) | (-0.011<br>-0.018) | (-0.013<br>-0.011) | (-0.012<br>-0.013) | (-0.008<br>-0.021) | (-0.008<br>-0.023) | (-0.014<br>-0.010) | (-0.010<br>-0.017) | (-0.013<br>-0.008) | (-0.012<br>-0.016) |
| BZ | (-0.027<br>-0.046) |                    | (-0.015<br>-0.016) | (-0.010<br>-0.021) | (-0.025<br>-0.017) | (-0.011<br>-0.012) | (-0.012<br>-0.012) | (-0.016<br>-0.010) | (-0.009<br>-0.015) | (-0.101<br>-0.078) | (-0.012<br>-0.017) | (-0.017<br>-0.010) | (-0.014<br>-0.013) | (-0.013<br>-0.010) | (-0.037<br>-0.109) | (-0.013<br>-0.013) | (-0.014<br>-0.010) | (-0.013<br>-0.020) | (-0.013<br>-0.011) | (-0.012<br>-0.013) | (-0.013<br>-0.010) | (-0.012<br>-0.013) | (-0.014<br>-0.008) | (-0.014<br>-0.008) | (-0.013<br>-0.010) | (-0.015<br>-0.010) | (-0.013<br>-0.015) |
| OR | (-0.035<br>-0.062) | (-0.023<br>-0.049) |                    | (-0.016<br>-0.018) | (-0.029<br>-0.020) | (-0.016<br>-0.012) | (-0.013<br>-0.018) | (-0.019<br>-0.009) | (-0.015<br>-0.020) | (-0.089<br>-0.105) | (-0.016<br>-0.016) | (-0.016<br>-0.020) | (-0.009<br>-0.033) | (-0.014<br>-0.020) | (-0.05<br>-0.102)  | (-0.014<br>-0.021) | (-0.016<br>-0.011) | (-0.016<br>-0.015) | (-0.012<br>-0.015) | (-0.016<br>-0.014) | (-0.014<br>-0.019) | (-0.009<br>-0.021) | (-0.008<br>-0.025) | (-0.010<br>-0.023) | (-0.013<br>-0.025) | (-0.018<br>-0.016) | (-0.016<br>-0.017) |
| PN | (-0.028<br>-0.062) | (-0.024<br>-0.071) | (-0.028<br>-0.052) |                    | (-0.021<br>-0.030) | (-0.010<br>-0.016) | (-0.012<br>-0.013) | (-0.013<br>-0.011) | (-0.010<br>-0.016) | (-0.096<br>-0.080) | (-0.012<br>-0.015) | (-0.011<br>-0.029) | (-0.004<br>-0.031) | (-0.012<br>-0.020) | (-0.045<br>-0.109) | (-0.010<br>-0.020) | (-0.008<br>-0.016) | (-0.011<br>-0.015) | (-0.005<br>-0.026) | (-0.008<br>-0.021) | (-0.010<br>-0.018) | (-0.004<br>-0.029) | (-0.004<br>-0.031) | (-0.009<br>-0.019) | (-0.008<br>-0.026) | (-0.009<br>-0.021) | (-0.012<br>-0.015) |
| CG | (-0.039<br>-0.080) | (-0.039<br>-0.074) | (-0.043<br>-0.070) | (-0.044<br>-0.088) |                    | (-0.022<br>-0.023) | (-0.026<br>-0.020) | (-0.023<br>-0.020) | (-0.018<br>-0.025) | (-0.121<br>-0.101) | (-0.026<br>-0.015) | (-0.026<br>-0.021) | (-0.023<br>-0.023) | (-0.020<br>-0.021) | (-0.051<br>-0.108) | (-0.024<br>-0.018) | (-0.025<br>-0.014) | (-0.022<br>-0.022) | (-0.025<br>-0.018) | (-0.017<br>-0.022) | (-0.023<br>-0.019) | (-0.020<br>-0.024) | (-0.021<br>-0.024) | (-0.022<br>-0.019) | (-0.021<br>-0.022) | (-0.023<br>-0.019) | (-0.026<br>-0.024) |
| BM | (-0.034<br>-0.044) | (-0.024<br>-0.043) | (-0.026<br>-0.045) | (-0.026<br>-0.053) | (-0.047<br>-0.078) |                    | (-0.013<br>-0.009) | (-0.014<br>-0.006) | (-0.011<br>-0.016) | (-0.083<br>-0.091) | (-0.015<br>-0.008) | (-0.015<br>-0.018) | (-0.008<br>-0.020) | (-0.011<br>-0.013) | (-0.048<br>-0.093) | (-0.013<br>-0.010) | (-0.012<br>-0.010) | (-0.013<br>-0.014) | (-0.011<br>-0.011) | (-0.011<br>-0.011) | (-0.011<br>-0.012) | (-0.013<br>-0.010) | (-0.010<br>-0.015) | (-0.014<br>-0.011) | (-0.007<br>-0.024) | (-0.015<br>-0.010) | (-0.013<br>-0.011) |
| AM | (-0.036<br>-0.052) | (-0.031<br>-0.043) | (-0.031<br>-0.055) | (-0.030<br>-0.043) | (-0.042<br>-0.077) | (-0.037<br>-0.036) |                    | (-0.014<br>-0.007) | (-0.009<br>-0.017) | (-0.106<br>-0.077) | (-0.016<br>-0.010) | (-0.014<br>-0.020) | (-0.013<br>-0.016) | (-0.016<br>-0.009) | (-0.051<br>-0.098) | (-0.013<br>-0.011) | (-0.012<br>-0.009) | (-0.014<br>-0.012) | (-0.010<br>-0.016) | (-0.009<br>-0.017) | (-0.015<br>-0.009) | (-0.011<br>-0.016) | (-0.012<br>-0.013) | (-0.014<br>-0.009) | (-0.008<br>-0.022) | (-0.014<br>-0.009) | (-0.015<br>-0.011) |
| LA | (-0.022<br>-0.040) | (-0.027<br>-0.038) | (-0.023<br>-0.039) | (-0.030<br>-0.044) | (-0.038<br>-0.071) | (-0.038<br>-0.022) | (-0.040<br>-0.028) |                    | (-0.013<br>-0.014) | (-0.095<br>-0.080) | (-0.013<br>-0.013) | (-0.014<br>-0.020) | (-0.010<br>-0.022) | (-0.015<br>-0.012) | (-0.046<br>-0.092) | (-0.014<br>-0.010) | (-0.014<br>-0.007) | (-0.015<br>-0.008) | (-0.014<br>-0.008) | (-0.014<br>-0.010) | (-0.015<br>-0.011) | (-0.010<br>-0.015) | (-0.013<br>-0.015) | (-0.013<br>-0.011) | (-0.011<br>-0.020) | (-0.015<br>-0.012) | (-0.015<br>-0.010) |
| TG | (-0.031<br>-0.045) | (-0.024<br>-0.056) | (-0.030<br>-0.048) | (-0.028<br>-0.051) | (-0.044<br>-0.082) | (-0.037<br>-0.045) | (-0.037<br>-0.050) | (-0.040<br>-0.035) |                    | (-0.108<br>-0.065) | (-0.010<br>-0.020) | (-0.011<br>-0.023) | (-0.008<br>-0.021) | (-0.013<br>-0.012) | (-0.033<br>-0.117) | (-0.011<br>-0.013) | (-0.007<br>-0.019) | (-0.011<br>-0.017) | (-0.012<br>-0.020) | (-0.013<br>-0.010) | (-0.011<br>-0.015) | (-0.007<br>-0.025) | (-0.009<br>-0.021) | (-0.009<br>-0.013) | (-0.011<br>-0.018) | (-0.013<br>-0.010) | (-0.011<br>-0.018) |
| LP | (-0.085<br>-0.194) | (-0.093<br>-0.194) | (-0.094<br>-0.248) | (-0.075<br>-0.175) | (-0.102<br>-0.230) | (-0.101<br>-0.227) | (-0.088<br>-0.205) | (-0.100<br>-0.203) | (-0.084<br>-0.149) |                    | (-0.082<br>-0.082) | (-0.105<br>-0.095) | (-0.082<br>-0.088) | (-0.084<br>-0.086) | (-0.174<br>-0.209) | (-0.087<br>-0.080) | (-0.089<br>-0.085) | (-0.097<br>-0.064) | (-0.089<br>-0.082) | (-0.096<br>-0.079) | (-0.091<br>-0.092) | (-0.080<br>-0.112) | (-0.080<br>-0.093) | (-0.083<br>-0.090) | (-0.091<br>-0.077) | (-0.08<br>-0.093)  | (-0.105<br>-0.090) |
| AT | (-0.041<br>-0.058) | (-0.036<br>-0.054) | (-0.039<br>-0.062) | (-0.039<br>-0.048) | (-0.047<br>-0.066) | (-0.050<br>-0.029) | (-0.052<br>-0.031) | (-0.042<br>-0.044) | (-0.044<br>-0.058) | (-0.101<br>-0.214) |                    | (-0.015<br>-0.022) | (-0.012<br>-0.020) | (-0.013<br>-0.013) | (-0.044<br>-0.094) | (-0.017<br>-0.006) | (-0.014<br>-0.009) | (-0.016<br>-0.011) | (-0.010<br>-0.018) | (-0.012<br>-0.014) | (-0.012<br>-0.018) | (-0.013<br>-0.017) | (-0.010<br>-0.021) | (-0.014<br>-0.015) | (-0.007<br>-0.027) | (-0.016<br>-0.011) | (-0.014<br>-0.015) |
| PM | (-0.033<br>-0.053) | (-0.042<br>-0.033) | (-0.031<br>-0.055) | (-0.042<br>-0.063) | (-0.045<br>-0.086) | (-0.036<br>-0.061) | (-0.044<br>-0.058) | (-0.035<br>-0.056) | (-0.038<br>-0.062) | (-0.101<br>-0.243) | (-0.041<br>-0.064) |                    | (-0.015<br>-0.019) | (-0.016<br>-0.019) | (-0.033<br>-0.106) | (-0.015<br>-0.021) | (-0.014<br>-0.018) | (-0.013<br>-0.031) | (-0.013<br>-0.017) | (-0.014<br>-0.017) | (-0.016<br>-0.015) | (-0.016<br>-0.015) | (-0.014<br>-0.014) | (-0.015<br>-0.016) | (-0.014<br>-0.015) | (-0.017<br>-0.017) | (-0.017<br>-0.021) |
| TV | (-0.038<br>-0.056) | (-0.030<br>-0.046) | (-0.037<br>-0.088) | (-0.007<br>-0.096) | (-0.044<br>-0.080) | (-0.037<br>-0.062) | (-0.032<br>-0.052) | (-0.028<br>-0.064) | (-0.021<br>-0.072) | (-0.089<br>-0.212) | (-0.043<br>-0.066) | (-0.034<br>-0.065) |                    | (-0.015<br>-0.012) | (-0.026<br>-0.112) | (-0.013<br>-0.013) | (-0.011<br>-0.018) | (-0.011<br>-0.024) | (-0.007<br>-0.022) | (-0.005<br>-0.027) | (-0.010<br>-0.016) | (-0.011<br>-0.021) | (-0.014<br>-0.012) | (-0.013<br>-0.015) | (-0.011<br>-0.017) | (-0.014<br>-0.014) | (-0.009<br>-0.027) |
| VL | (-0.032<br>-0.049) | (-0.030<br>-0.044) | (-0.037<br>-0.067) | (-0.040<br>-0.053) | (-0.041<br>-0.078) | (-0.031<br>-0.046) | (-0.034<br>-0.039) | (-0.038<br>-0.047) | (-0.038<br>-0.050) | (-0.095<br>-0.209) | (-0.049<br>-0.049) | (-0.043<br>-0.060) | (-0.034<br>-0.052) |                    | (-0.029<br>-0.120) | (-0.015<br>-0.011) | (-0.010<br>-0.013) | (-0.016<br>-0.012) | (-0.010<br>-0.015) | (-0.012<br>-0.012) | (-0.016<br>-0.008) | (-0.008<br>-0.019) | (-0.014<br>-0.015) | (-0.011<br>-0.013) | (-0.012<br>-0.015) | (-0.017<br>-0.005) | (-0.012<br>-0.017) |

|    |                    |                    |                    |                    |                    |                    |                    |                    |                    |                    |                    |                    |                    |                    |                    |                    |                    |                    |                    |                    |                    |                    |                    |                    |                    |                    |                    |
|----|--------------------|--------------------|--------------------|--------------------|--------------------|--------------------|--------------------|--------------------|--------------------|--------------------|--------------------|--------------------|--------------------|--------------------|--------------------|--------------------|--------------------|--------------------|--------------------|--------------------|--------------------|--------------------|--------------------|--------------------|--------------------|--------------------|--------------------|
| SG | (-0.167<br>-0.220) | (-0.157<br>-0.221) | (-0.121<br>-0.225) | (-0.118<br>-0.263) | (-0.141<br>-0.226) | (-0.136<br>-0.193) | (-0.133<br>-0.220) | (-0.138<br>-0.213) | (-0.158<br>-0.241) | (-0.175<br>-0.279) | (-0.135<br>-0.228) | (-0.153<br>-0.222) | (-0.179<br>-0.213) | (-0.152<br>-0.236) |                    | (-0.041<br>-0.090) | (-0.042<br>-0.092) | (-0.052<br>-0.087) | (-0.050<br>-0.084) | (-0.043<br>-0.093) | (-0.037<br>-0.109) | (-0.032<br>-0.110) | (-0.028<br>-0.110) | (-0.037<br>-0.104) | (-0.021<br>-0.119) | (-0.034<br>-0.112) | (-0.046<br>-0.108) |
| LR | (-0.027<br>-0.053) | (-0.029<br>-0.052) | (-0.043<br>-0.070) | (-0.038<br>-0.072) | (-0.046<br>-0.080) | (-0.032<br>-0.054) | (-0.036<br>-0.048) | (-0.028<br>-0.049) | (-0.032<br>-0.048) | (-0.106<br>-0.228) | (-0.058<br>-0.025) | (-0.044<br>-0.066) | (-0.032<br>-0.053) | (-0.044<br>-0.051) | (-0.144<br>-0.213) |                    | (-0.013<br>-0.011) | (-0.014<br>-0.011) | (-0.012<br>-0.013) | (-0.012<br>-0.010) | (-0.010<br>-0.016) | (-0.011<br>-0.018) | (-0.014<br>-0.012) | (-0.015<br>-0.007) | (-0.011<br>-0.018) | (-0.016<br>-0.007) | (-0.013<br>-0.018) |
| RB | (-0.027<br>-0.048) | (-0.021<br>-0.037) | (-0.025<br>-0.043) | (-0.017<br>-0.058) | (-0.035<br>-0.064) | (-0.023<br>-0.036) | (-0.023<br>-0.036) | (-0.019<br>-0.032) | (-0.026<br>-0.047) | (-0.088<br>-0.224) | (-0.027<br>-0.037) | (-0.030<br>-0.059) | (-0.038<br>-0.056) | (-0.024<br>-0.052) | (-0.142<br>-0.221) | (-0.026<br>-0.050) |                    | (-0.016<br>-0.010) | (-0.008<br>-0.015) | (-0.011<br>-0.010) | (-0.010<br>-0.014) | (-0.012<br>-0.014) | (-0.011<br>-0.013) | (-0.013<br>-0.012) | (-0.010<br>-0.020) | (-0.014<br>-0.010) | (-0.014<br>-0.010) |
| CB | (-0.036<br>-0.060) | (-0.035<br>-0.060) | (-0.036<br>-0.057) | (-0.025<br>-0.058) | (-0.050<br>-0.077) | (-0.041<br>-0.050) | (-0.036<br>-0.042) | (-0.026<br>-0.047) | (-0.038<br>-0.054) | (-0.093<br>-0.188) | (-0.049<br>-0.044) | (-0.049<br>-0.074) | (-0.041<br>-0.064) | (-0.053<br>-0.041) | (-0.135<br>-0.234) | (-0.032<br>-0.059) | (-0.027<br>-0.046) |                    | (-0.007<br>-0.022) | (-0.010<br>-0.015) | (-0.011<br>-0.020) | (-0.007<br>-0.027) | (-0.008<br>-0.023) | (-0.012<br>-0.016) | (-0.008<br>-0.027) | (-0.018<br>-0.009) | (-0.014<br>-0.015) |
| SB | (-0.034<br>-0.056) | (-0.026<br>-0.040) | (-0.027<br>-0.051) | (-0.041<br>-0.073) | (-0.044<br>-0.064) | (-0.032<br>-0.047) | (-0.028<br>-0.067) | (-0.035<br>-0.035) | (-0.038<br>-0.060) | (-0.098<br>-0.225) | (-0.048<br>-0.060) | (-0.037<br>-0.056) | (-0.017<br>-0.081) | (-0.038<br>-0.053) | (-0.123<br>-0.217) | (-0.040<br>-0.053) | (-0.020<br>-0.050) | (-0.025<br>-0.082) |                    | (-0.013<br>-0.009) | (-0.012<br>-0.013) | (-0.009<br>-0.014) | (-0.011<br>-0.011) | (-0.011<br>-0.014) | (-0.012<br>-0.019) | (-0.012<br>-0.017) | (-0.009<br>-0.021) |
| EB | (-0.024<br>-0.045) | (-0.025<br>-0.049) | (-0.028<br>-0.052) | (-0.016<br>-0.064) | (-0.040<br>-0.077) | (-0.026<br>-0.039) | (-0.029<br>-0.054) | (-0.027<br>-0.040) | (-0.023<br>-0.035) | (-0.080<br>-0.202) | (-0.035<br>-0.053) | (-0.032<br>-0.057) | (-0.007<br>-0.105) | (-0.030<br>-0.045) | (-0.124<br>-0.202) | (-0.027<br>-0.047) | (-0.026<br>-0.041) | (-0.029<br>-0.058) | (-0.031<br>-0.042) |                    | (-0.010<br>-0.017) | (-0.009<br>-0.014) | (-0.009<br>-0.014) | (-0.009<br>-0.015) | (-0.007<br>-0.023) | (-0.013<br>-0.010) | (-0.012<br>-0.016) |
| ES | (-0.030<br>-0.044) | (-0.025<br>-0.036) | (-0.039<br>-0.056) | (-0.035<br>-0.045) | (-0.048<br>-0.071) | (-0.035<br>-0.045) | (-0.047<br>-0.029) | (-0.048<br>-0.026) | (-0.036<br>-0.050) | (-0.089<br>-0.218) | (-0.053<br>-0.056) | (-0.039<br>-0.048) | (-0.029<br>-0.049) | (-0.045<br>-0.029) | (-0.147<br>-0.222) | (-0.043<br>-0.065) | (-0.030<br>-0.043) | (-0.043<br>-0.060) | (-0.034<br>-0.048) | (-0.032<br>-0.050) |                    | (-0.009<br>-0.020) | (-0.011<br>-0.016) | (-0.010<br>-0.016) | (-0.011<br>-0.016) | (-0.014<br>-0.010) | (-0.012<br>-0.018) |
| IM | (-0.030<br>-0.053) | (-0.024<br>-0.041) | (-0.029<br>-0.062) | (-0.016<br>-0.077) | (-0.042<br>-0.076) | (-0.029<br>-0.040) | (-0.029<br>-0.053) | (-0.027<br>-0.043) | (-0.031<br>-0.063) | (-0.100<br>-0.241) | (-0.036<br>-0.049) | (-0.030<br>-0.057) | (-0.038<br>-0.056) | (-0.019<br>-0.056) | (-0.149<br>-0.196) | (-0.029<br>-0.057) | (-0.022<br>-0.035) | (-0.032<br>-0.063) | (-0.025<br>-0.049) | (-0.016<br>-0.043) | (-0.023<br>-0.061) |                    | (-0.011<br>-0.016) | (-0.012<br>-0.013) | (-0.007<br>-0.026) | (-0.012<br>-0.015) | (-0.009<br>-0.020) |
| ML | (-0.040<br>-0.075) | (-0.029<br>-0.040) | (-0.030<br>-0.076) | (-0.043<br>-0.075) | (-0.050<br>-0.090) | (-0.037<br>-0.060) | (-0.039<br>-0.051) | (-0.041<br>-0.059) | (-0.043<br>-0.066) | (-0.102<br>-0.219) | (-0.047<br>-0.067) | (-0.040<br>-0.055) | (-0.034<br>-0.047) | (-0.043<br>-0.063) | (-0.148<br>-0.205) | (-0.033<br>-0.052) | (-0.029<br>-0.049) | (-0.038<br>-0.063) | (-0.032<br>-0.045) | (-0.029<br>-0.053) | (-0.046<br>-0.056) | (-0.03<br>-0.058)  |                    | (-0.014<br>-0.013) | (-0.008<br>-0.021) | (-0.012<br>-0.013) | (-0.012<br>-0.021) |
| TT | (-0.031<br>-0.044) | (-0.022<br>-0.038) | (-0.025<br>-0.059) | (-0.037<br>-0.051) | (-0.035<br>-0.073) | (-0.037<br>-0.039) | (-0.031<br>-0.038) | (-0.032<br>-0.036) | (-0.031<br>-0.038) | (-0.082<br>-0.200) | (-0.036<br>-0.056) | (-0.038<br>-0.048) | (-0.027<br>-0.055) | (-0.028<br>-0.049) | (-0.144<br>-0.209) | (-0.022<br>-0.041) | (-0.022<br>-0.035) | (-0.031<br>-0.051) | (-0.034<br>-0.045) | (-0.020<br>-0.053) | (-0.031<br>-0.052) | (-0.022<br>-0.036) | (-0.035<br>-0.042) |                    | (-0.009<br>-0.019) | (-0.013<br>-0.007) | (-0.015<br>-0.012) |
| BJ | (-0.027<br>-0.054) | (-0.022<br>-0.042) | (-0.038<br>-0.067) | (-0.022<br>-0.073) | (-0.041<br>-0.077) | (-0.026<br>-0.066) | (-0.026<br>-0.069) | (-0.026<br>-0.054) | (-0.028<br>-0.058) | (-0.087<br>-0.186) | (-0.045<br>-0.075) | (-0.031<br>-0.056) | (-0.028<br>-0.061) | (-0.037<br>-0.057) | (-0.156<br>-0.255) | (-0.039<br>-0.069) | (-0.029<br>-0.062) | (-0.034<br>-0.077) | (-0.034<br>-0.054) | (-0.024<br>-0.068) | (-0.030<br>-0.055) | (-0.019<br>-0.068) | (-0.026<br>-0.072) | (-0.023<br>-0.059) |                    | (-0.013<br>-0.017) | (-0.008<br>-0.026) |
| LB | (-0.024<br>-0.042) | (-0.022<br>-0.039) | (-0.048<br>-0.038) | (-0.024<br>-0.069) | (-0.047<br>-0.075) | (-0.036<br>-0.034) | (-0.028<br>-0.041) | (-0.029<br>-0.046) | (-0.031<br>-0.047) | (-0.094<br>-0.227) | (-0.049<br>-0.036) | (-0.032<br>-0.056) | (-0.030<br>-0.058) | (-0.039<br>-0.027) | (-0.136<br>-0.228) | (-0.048<br>-0.028) | (-0.023<br>-0.039) | (-0.028<br>-0.051) | (-0.035<br>-0.066) | (-0.029<br>-0.046) | (-0.036<br>-0.047) | (-0.025<br>-0.043) | (-0.033<br>-0.053) | (-0.020<br>-0.033) | (-0.039<br>-0.056) |                    | (-0.013<br>-0.014) |
| DK | (-0.029<br>-0.054) | (-0.025<br>-0.045) | (-0.024<br>-0.052) | (-0.022<br>-0.046) | (-0.038<br>-0.076) | (-0.029<br>-0.038) | (-0.033<br>-0.040) | (-0.035<br>-0.038) | (-0.034<br>-0.045) | (-0.082<br>-0.198) | (-0.043<br>-0.047) | (-0.036<br>-0.058) | (-0.022<br>-0.096) | (-0.037<br>-0.056) | (-0.127<br>-0.223) | (-0.032<br>-0.065) | (-0.020<br>-0.033) | (-0.037<br>-0.057) | (-0.038<br>-0.055) | (-0.032<br>-0.049) | (-0.035<br>-0.046) | (-0.019<br>-0.051) | (-0.041<br>-0.060) | (-0.025<br>-0.041) | (-0.018<br>-0.067) | (-0.028<br>-0.044) |                    |

Table S3 - Mean validation scores obtained using each of the distinct techniques (GLM, GBM, GAM, FDA, MARS and RF).

| Model | AUC mean ( $\pm$ SD) | ROC sensitivity     | ROC specificity    | TSS mean ( $\pm$ SD) | Sensitivity ( $\pm$ SD) | Specificity ( $\pm$ SD) |
|-------|----------------------|---------------------|--------------------|----------------------|-------------------------|-------------------------|
| GLM   | 0.901 $\pm$ 0.022    | 86.182 $\pm$ 7.892  | 83.694 $\pm$ 6.395 | 0.689 $\pm$ 0.049    | 83.939 $\pm$ 7.579      | 84.792 $\pm$ 6.078      |
| GBM   | 0.931 $\pm$ 0.021    | 87.515 $\pm$ 5.829  | 87.745 $\pm$ 4.851 | 0.744 $\pm$ 0.059    | 85.757 $\pm$ 6.879      | 88.451 $\pm$ 4.338      |
| GAM   | 0.903 $\pm$ 0.025    | 89.758 $\pm$ 6.119  | 81.370 $\pm$ 4.660 | 0.699 $\pm$ 0.049    | 88.545 $\pm$ 6.429      | 81.311 $\pm$ 5.471      |
| FDA   | 0.879 $\pm$ 0.030    | 78.727 $\pm$ 7.231  | 87.260 $\pm$ 6.424 | 0.652 $\pm$ 0.064    | 76.303 $\pm$ 6.864      | 88.502 $\pm$ 4.241      |
| MARS  | 0.879 $\pm$ 0.099    | 82.121 $\pm$ 15.049 | 84.213 $\pm$ 7.620 | 0.657 $\pm$ 0.112    | 80.182 $\pm$ 14.632     | 85.311 $\pm$ 7.167      |
| RF    | 0.939 $\pm$ 0.018    | 92.424 $\pm$ 5.095  | 86.026 $\pm$ 4.060 | 0.775 $\pm$ 0.044    | 90.848 $\pm$ 4.762      | 86.417 $\pm$ 3.823      |

Table S4 - One-way ANOVA on the effect of minimum sea surface temperature (SST min) and surface air temperature (SAT min) on *P. perna* presence/absence along the warm temperate and cool temperate southwest South African provinces at three trials (Trial 1, Trial 2 and Trial 3). Statistical significant values are depicted in bold.

| Source  | Trial 1 |        |         |                 | Trial 2 |        |         |                 | Trial 3 |        |         |                 |
|---------|---------|--------|---------|-----------------|---------|--------|---------|-----------------|---------|--------|---------|-----------------|
|         | df      | MS     | F-ratio | P-value         | df      | MS     | F-ratio | P-value         | df      | MS     | F-ratio | P-value         |
| SST min |         |        |         |                 |         |        |         |                 |         |        |         |                 |
| Record  | 1       | 29.668 | 28.147  | <b>0.000071</b> | 1       | 35.149 | 31.860  | <b>0.000037</b> | 1       | 46.263 | 46.658  | <b>0.000004</b> |
| Error   | 16      | 1.054  |         |                 | 16      | 1.103  |         |                 | 16      | 0.992  |         |                 |
| SAT min |         |        |         |                 |         |        |         |                 |         |        |         |                 |
| Record  | 1       | 0.0775 | 0.0709  | 0.796           | 1       | 0.722  | 0.4607  | 0.511           | 1       | 6.5342 | 3.9276  | 0.063           |
| Error   | 16      | 1.0929 |         |                 | 16      | 1.5672 |         |                 | 16      | 1.6637 |         |                 |

Table S5 – Atlantic and Mediterranean surveyed locations along Iberian shores. Presence of *Mytilus galloprovincialis* depicts potential suitable locations for *P. perna*.

| Country  | Location               | Coordinates                  | <i>M. galloprovincialis</i> |
|----------|------------------------|------------------------------|-----------------------------|
| Portugal | Viana do Castelo       | 41°41'57.85"N; 08°51'23.81"W | Present                     |
| Portugal | Ericeira               | 38°57'21.03"N; 09°25'00.97"W | Present                     |
| Portugal | Lizandro               | 38°56'28.13"N; 09°25'02.28"W | Present                     |
| Portugal | Malhão                 | 37°46'44.64"N; 08°48'09.35"W | Present                     |
| Portugal | Vila Nova de Milfontes | 37°43'04.79"N; 08°47'27.73"W | Present                     |
| Portugal | Amoreira               | 37°20'59.18"N; 08°50'53.15"W | Present                     |
| Portugal | Castelejo              | 37°06'08.00"N; 08°56'44.29"W | Present                     |
| Portugal | Sagres                 | 37°00'23.69"N; 08°56'55.80"W | Present                     |
| Portugal | Lagos                  | 37°05'55.10"N; 08°40'02.38"W | Present                     |
| Portugal | Alvor                  | 37°07'44.45"N; 08°35'47.71"W | Present                     |
| Portugal | Pintadinho             | 37°06'32.07"N; 08°31'11.63"W | Present                     |
| Portugal | Albufeira              | 37°05'21.03"N; 08°11'29.76"W | Present                     |

|          |                    |                              |         |
|----------|--------------------|------------------------------|---------|
| Portugal | Vilamoura          | 37°04'05.50"N; 08°06'42.64"W | Present |
| Portugal | Farol              | 36°58'29.95"N; 07°51'42.17"W | Present |
| Portugal | Tavira             | 37°06'41.06"N; 07°36'57.99"W | Present |
| Portugal | V. R. de Santo     | 37°10'03.78"N; 07°24'09.03"W | Present |
| Spain    | Punta del Moral    | 37°10'57.76"N; 07°19'46.83"W | Present |
| Spain    | Punta Umbria       | 37°09'53.78"N; 06°56'54.38"W | Present |
| Spain    | Huelva             | 37°07'45.19"N; 06°51'09.43"W | Absent  |
| Spain    | Rota               | 36°36'55.50"N; 06°21'27.85"W | Absent  |
| Spain    | Puerto Sherry      | 36°34'48.65"N; 06°15'55.07"W | Absent  |
| Spain    | Barbate            | 36°11'00.22"N; 05°56'10.82"W | Absent  |
| Spain    | Atlanterra         | 36°05'24.78"N; 05°48'43.02"W | Present |
| Spain    | Paloma Baja        | 36°03'49.70"N; 05°43'39.89"W | Absent  |
| Spain    | Tarifa             | 36°00'27.89"N; 05°36'26.09"W | Absent  |
| Spain    | Los Palmones       | 36°10'34.28"N; 05°25'28.26"W | Present |
| Spain    | Torreguadiaro      | 36°18'00.14"N; 05°16'04.77"W | Present |
| Spain    | La Araña           | 36°42'41.35"N; 04°19'37.50"W | Present |
| Spain    | Almuñecar          | 36°43'39.84"N; 03°41'39.86"W | Present |
| Spain    | Balerna            | 36°41'56.20"N; 02°51'33.99"W | Present |
| Spain    | Roquetas de Mar    | 36°45'27.41"N; 02°36'15.26"W | Absent  |
| Spain    | Aguadulce          | 36°48'40.91"N; 02°34'00.66"W | Absent  |
| Spain    | Cabo de Gata       | 36°44'00.26"N; 02°12'14.70"W | Present |
| Spain    | La Isleta          | 36°47'53.54"N; 02°03'42.64"W | Absent  |
| Spain    | Garrucha           | 37°10'21.02"N; 01°49'18.30"W | Absent  |
| Spain    | Villaricos         | 37°14'49.74"N; 01°46'15.80"W | Absent  |
| Spain    | Aguilas            | 37°24'15.16"N; 01°33'56.64"W | Absent  |
| Spain    | Calabardina        | 37°25'53.29"N; 01°30'27.11"W | Absent  |
| Spain    | Cape Cope          | 37°26'12.49"N; 01°29'02.88"W | Absent  |
| Spain    | Puerto de Mazarron | 37°33'28.51"N; 01°17'10.24"W | Absent  |
| Spain    | Portman            | 37°34'50.35"N; 00°51'13.23"W | Absent  |
| Spain    | Cape Palos         | 37°38'00.94"N; 00°41'23.95"W | Absent  |
| Spain    | Guardamar del      | 38°06'37.33"N; 00°38'27.07"W | Absent  |
| Spain    | Santa Pola         | 38°11'18.94"N; 00°33'06.45"W | Absent  |
| Spain    | Alicante           | 38°21'07.64"N; 00°24'40.40"W | Absent  |
| Spain    | Calpe              | 38°38'25.71"N; 00°03'56.53"E | Absent  |
| Spain    | Cape de la Nau     | 38°43'51.27"N; 00°13'08.85"E | Absent  |
| Spain    | Dénia              | 38°57'50.66"N; 00°07'43.58"W | Present |
| Spain    | Cullera            | 39°11'16.26"N; 00°13'17.20"W | Present |

Table S6 – List of sampling sites for genetic samples of *P. perna* populations.

| Country/Territory | Location        | Code | Coordinates                  |
|-------------------|-----------------|------|------------------------------|
| Tunisia           | Korbous         | KR   | 36°49'29.04"N; 10°33'59.97"E |
| Tunisia           | Bizerte         | BZ   | 37°15'10.41"N; 09°56'41.15"E |
| Algeria           | Annaba bay      | AN   | 36°50'32.48"N; 07°51'17.48"E |
| Morocco           | Punta Negri     | PN   | 35°16'46.33"N; 03°08'06.63"W |
| Spain             | Cape Gata       | CG   | 36°44'00.26"N; 02°12'14.70"W |
| Spain             | Balerna         | BM   | 36°41'56.20"N; 02°51'33.99"W |
| Spain             | Almuñecar       | AM   | 36°43'39.84"N; 03°41'39.86"W |
| Spain             | La Araña        | LA   | 36°42'41.35"N; 04°19'37.50"W |
| Spain             | Torreguadiaro   | TG   | 36°18'00.14"N; 05°16'04.77"W |
| Spain             | Los Palmones    | LP   | 36°10'34.28"N; 05°25'28.26"W |
| Spain             | Atlanterra      | AT   | 36°05'24.78"N; 05°48'43.02"W |
| Spain             | Punta del Moral | PM   | 37°10'57.76"N; 07°19'46.83"W |
| Portugal          | Tavira          | TV   | 37°06'41.06"N; 07°36'57.99"W |
| Portugal          | Vilamoura       | VL   | 37°04'05.50"N; 08°06'42.64"W |
| Portugal          | Sagres          | SG   | 37°00'23.69"N; 08°56'55.80"W |
| Morocco           | Larache         | LR   | 35°11'48.14"N; 06°09'30.61"W |
| Morocco           | Rabat           | RB   | 34°01'57.26"N; 06°50'27.96"W |
| Morocco           | Casablanca      | CB   | 33°39'07.22"N; 07°29'03.11"W |
| Morocco           | Sidi Bouzid     | SB   | 33°13'06.11"N; 08°34'23.19"W |
| Morocco           | El Beddouza     | EB   | 32°32'42.33"N; 09°16'55.34"W |
| Morocco           | Essaouira       | ES   | 31°30'42.78"N; 09°46'24.31"W |
| Morocco           | Imsouane        | IM   | 30°50'24.43"N; 09°49'21.92"W |
| Morocco           | Mirleft         | ML   | 29°35'06.58"N; 10°02'50.78"W |
| Morocco           | Tan Tan plage   | TT   | 28°30'05.58"N; 11°20'06.38"W |
| Western Sahara    | Boujdour        | BJ   | 26°07'38.95"N; 14°30'02.38"W |
| Western Sahara    | Nouifed         | LB   | 24°54'30.29"N; 14°49'45.36"W |
| Western Sahara    | Dakhla          | DK   | 23°46'06.97"N; 15°55'32.16"W |

Table S7 – Presence/absence records of *P. perna* used for the environmental niche modelling approach.

| Country | Location          | Coordinates                  | Presence | Reference  |
|---------|-------------------|------------------------------|----------|------------|
| Tunisia | Zembra Island     | 37°08'25.96"N; 10°48'28.94"E | Present  | 1          |
| Tunisia | Korbous           | 36°49'29.04"N; 10°33'59.97"E | Present  | This study |
| Tunisia | La Goulette       | 36°49'18.84"N; 10°18'42.14"E | Present  | 1          |
| Tunisia | Bizerte           | 37°15'10.41"N; 09°56'41.15"E | Present  | This study |
| Tunisia | Tabarka           | 36°57'39.05"N; 08°45'02.62"E | Present  | 1          |
| Algeria | La Kyenne Beach   | 36°58'02.00"N; 07°46'24.00"E | Present  | 2          |
| Algeria | Saint Cloud Beach | 36°55'22.20"N; 07°45'50.20"E | Present  | 2          |



|          |                            |                              |         |            |
|----------|----------------------------|------------------------------|---------|------------|
| Algeria  | Sunrise Beach              | 36°54'33.90"N; 07°46'20.90"E | Present | 2          |
| Algeria  | Sidi Salem Beach           | 36°52'02.00"N; 07°46'26.60"E | Present | 2          |
| Algeria  | Annaba Bay                 | 36°50'32.48"N; 07°51'17.48"E | Present | This study |
| Algeria  | Boubouaou El Bahri         | 36°46'33.56"N; 03°23'15.41"E | Present | 3          |
| Algeria  | Bordj El Kiffan            | 36°45'37.72"N; 03°12'45.24"E | Present | 3          |
| Spain    | Cullera                    | 39°11'16.26"N; 00°13'17.20"W | Absent  | This study |
| Spain    | Dénia                      | 38°57'50.66"N; 00°07'43.58"W | Absent  | This study |
| Spain    | Cape de la Nau             | 38°43'51.27"N; 00°13'08.85"E | Absent  | This study |
| Spain    | Calpe                      | 38°38'25.71"N; 00°03'56.53"E | Absent  | This study |
| Spain    | Alicante                   | 38°21'07.64"N; 00°24'40.40"W | Absent  | This study |
| Spain    | Santa Pola                 | 38°11'18.94"N; 00°33'06.45"W | Absent  | This study |
| Spain    | Guardamar del Segura       | 38°06'37.33"N; 00°38'27.07"W | Absent  | This study |
| Spain    | Cape Palos                 | 37°38'00.94"N; 00°41'23.95"W | Absent  | This study |
| Spain    | Portman                    | 37°34'50.35"N; 00°51'13.23"W | Absent  | This study |
| Spain    | Puerto de Mazarron         | 37°33'28.51"N; 01°17'10.24"W | Absent  | This study |
| Spain    | Cape Cope                  | 37°26'12.49"N; 01°29'02.88"W | Absent  | This study |
| Spain    | Calabardina                | 37°25'53.29"N; 01°30'27.11"W | Absent  | This study |
| Spain    | Aguilas (beach)            | 37°24'15.16"N; 01°33'56.64"W | Absent  | This study |
| Spain    | Villaricos                 | 37°14'49.74"N; 01°46'15.80"W | Absent  | This study |
| Spain    | Garrucha                   | 37°10'21.02"N; 01°49'18.30"W | Absent  | This study |
| Spain    | La Isleta (village)        | 36°48'47.17"N; 02°03'05.46"W | Absent  | This study |
| Spain    | La Isleta (beach)          | 36°47'53.54"N; 02°03'42.64"W | Absent  | This study |
| Spain    | Cape Gata                  | 36°44'00.26"N; 02°12'14.70"W | Present | This study |
| Spain    | Aguadulce                  | 36°48'40.91"N; 02°34'00.66"W | Absent  | This study |
| Spain    | Roquetas de Mar            | 36°45'27.41"N; 02°36'15.26"W | Absent  | This study |
| Spain    | Balerna                    | 36°41'56.20"N; 02°51'33.99"W | Present | This study |
| Spain    | Almuñecar                  | 36°43'39.84"N; 03°41'39.86"W | Present | This study |
| Spain    | La Araña                   | 36°42'41.35"N; 04°19'37.50"W | Present | This study |
| Spain    | Torreguadiaro              | 36°18'00.14"N; 05°16'04.77"W | Present | This study |
| Spain    | Los Palmones               | 36°10'34.28"N; 05°25'28.26"W | Present | This study |
| Spain    | Tarifa                     | 36°00'27.89"N; 05°36'26.09"W | Absent  | This study |
| Spain    | Paloma Baja                | 36°03'49.70"N; 05°43'39.89"W | Absent  | This study |
| Spain    | Atlánterra                 | 36°05'24.78"N; 05°48'43.02"W | Present | This study |
| Spain    | Barbate                    | 36°11'00.22"N; 05°56'10.82"W | Absent  | This study |
| Spain    | Puerto Sherry              | 36°34'48.65"N; 06°15'55.07"W | Absent  | This study |
| Spain    | Rota                       | 36°36'55.50"N; 06°21'27.85"W | Absent  | This study |
| Spain    | Huelva                     | 37°07'45.19"N; 06°51'09.43"W | Absent  | This study |
| Spain    | Punta Umbria               | 37°09'53.78"N; 06°56'54.38"W | Absent  | This study |
| Spain    | Punta del Moral            | 37°10'57.76"N; 07°19'46.83"W | Present | This study |
| Portugal | Vila Real de Santo António | 37°10'03.78"N; 07°24'09.03"W | Present | This study |
| Portugal | Tavira                     | 37°06'41.06"N; 07°36'57.99"W | Present | This study |
| Portugal | Farol                      | 36°58'29.95"N; 07°51'42.17"W | Present | This study |

|                |                        |                              |         |            |
|----------------|------------------------|------------------------------|---------|------------|
| Portugal       | Vilamoura              | 37°04'05.50"N; 08°06'42.64"W | Present | This study |
| Portugal       | Albufeira              | 37°05'21.03"N; 08°11'29.76"W | Absent  | This study |
| Portugal       | Pintadinho             | 37°06'32.07"N; 08°31'11.63"W | Absent  | This study |
| Portugal       | Lagos                  | 37°06'01.04"N; 08°40'02.80"W | Absent  | This study |
| Portugal       | Sagres                 | 37°00'23.69"N; 08°56'55.80"W | Present | This study |
| Portugal       | Castelejo              | 37°06'08.00"N; 08°56'44.29"W | Present | This study |
| Portugal       | Amoreira               | 37°20'59.18"N; 08°50'53.15"W | Absent  | This study |
| Portugal       | Vila Nova de Milfontes | 37°43'04.79"N; 08°47'27.73"W | Absent  | This study |
| Portugal       | Malhão                 | 37°46'44.64"N; 08°48'09.35"W | Absent  | This study |
| Portugal       | Lizandro               | 38°56'28.13"N; 09°25'02.28"W | Absent  | This study |
| Portugal       | Ericeira               | 38°57'21.03"N; 09°25'00.97"W | Absent  | This study |
| Portugal       | Viana do Castelo       | 41°41'57.85"N; 08°51'23.81"W | Absent  | This study |
| Morocco        | Punta Negri            | 35°16'46.33"N; 03°08'06.63"W | Present | This study |
| Morocco        | Larache                | 35°11'48.14"N; 06°09'30.61"W | Present | This study |
| Morocco        | Bouknadel              | 34°07'40.74"N; 06°45'14.63"W | Present | 4          |
| Morocco        | Rabat                  | 34°01'57.26"N; 06°50'27.96"W | Present | This study |
| Morocco        | Skhirat                | 33°52'15.84"N; 07°03'54.72"W | Present | 5          |
| Morocco        | Mohammedia             | 33°42'13.04"N; 07°24'49.62"W | Present | 4          |
| Morocco        | Casablanca             | 33°39'07.22"N; 07°29'03.11"W | Present | This study |
| Morocco        | Sidi Bouzid            | 33°13'06.11"N; 08°34'23.19"W | Present | This study |
| Morocco        | El Beddouza            | 32°32'42.33"N; 09°16'55.34"W | Present | This study |
| Morocco        | Essaouira              | 31°30'42.78"N; 09°46'24.31"W | Present | This study |
| Morocco        | Imsouane               | 30°50'24.43"N; 09°49'21.92"W | Present | This study |
| Morocco        | Anza                   | 30°27'00.18"N; 09°39'44.47"W | Present | This study |
| Morocco        | Mirleft                | 29°35'06.58"N; 10°02'50.78"W | Present | This study |
| Morocco        | Tan-Tan                | 28°30'05.58"N; 11°20'06.38"W | Present | This study |
| Morocco        | Tarfaya                | 27°45'33.64"N; 13°02'40.40"W | Absent  | This study |
| Western Sahara | Boujdour               | 26°07'38.95"N; 14°30'02.38"W | Present | This study |
| Western Sahara | Nouifed                | 24°54'30.29"N; 14°49'45.36"W | Present | This study |
| Western Sahara | Hassi El kraa          | 24°41'06.18"N; 14°54'08.87"W | Present | This study |
| Western Sahara | Dakhla                 | 23°46'06.97"N; 15°55'32.16"W | Present | This study |
| Mauritania     | Cansado – IMROP        | 20°51'27.19"N; 17°01'52.10"W | Present | 6          |
| Mauritania     | Cansado – COMECA       | 20°50'19.68"N; 17°02'01.57"W | Present | 6          |
| Mauritania     | Cansado – Oil port     | 20°49'54.71"N; 17°02'07.66"W | Present | 6          |
| Mauritania     | Nouadhibou             | 20°58'27.91"N; 17°00'32.18"W | Present | 7          |
| Mauritania     | Nouakchott             | 18°05'09.87"N; 16°01'35.15"W | Present | 7          |
| Senegal        | Dakar                  | 14°40'47.39"N; 17°28'11.23"W | Present | 8          |
| Ivory Coast    | Ebrie Lagoon           | 05°17'36.29"N; 04°00'37.57"W | Present | 9          |
| Ghana          | Benya lagoon           | 05°04'57.21"N; 01°20'48.94"W | Present | 10         |

|              |                                 |                              |         |            |
|--------------|---------------------------------|------------------------------|---------|------------|
| Ghana        | Sakumo lagoon                   | 05°31'02.85"N; 00°16'52.32"W | Present | 10         |
| Congo        | Pointe-Noire                    | 04°45'32.64"S; 11°50'13.97"E | Present | 11         |
| Angola       | Luanda                          | 08°52'11.28"S; 13°11'42.93"E | Present | This study |
| Namibia      | Rocky Point                     | 18°59'36.13"S; 12°28'36.54"E | Present | This study |
| Namibia      | Mowey Bay                       | 19°22'22.61"S; 12°42'19.38"E | Present | This study |
| Namibia      | Terrace Bay                     | 19°59'49.09"S; 13°02'01.24"E | Present | This study |
| Namibia      | Swakopmound                     | 22°40'07.52"S; 14°31'23.08"E | Present | This study |
| Namibia      | Walvis Bay                      | 22°55'28.69"S 14°31'03.66"E  | Present | This study |
| Namibia      | Sylvia Hill                     | 25°08'46.62"S; 14°50'43.44"E | Present | This study |
| Namibia      | Luderitz                        | 26°38'43.31"S; 15°05'25.62"E | Absent  | This study |
| South Africa | Alexander Bay                   | 28°40'05.74"S; 16°30'20.35"E | Absent  | This study |
| South Africa | Port Nolloth                    | 29°15'01.53"S; 16°52'02.30"E | Absent  | This study |
| South Africa | Brand-se-Baai                   | 31°17'30.09"S; 17°52'46.86"E | Absent  | This study |
| South Africa | Paternoster                     | 32°48'07.22"S 17°53'51.95"E  | Absent  | This study |
| South Africa | Elands Bay                      | 32°18'59.49"S; 18°18'54.50"E | Absent  | This study |
| South Africa | Saldanha Bay                    | 33°01'34.14"S; 17°56'30.55"E | Absent  | This study |
| South Africa | Yzerfontein                     | 33°21'14.99"S; 18°09'01.07"E | Absent  | This study |
| South Africa | Bloubergstrand                  | 33°48'06.18"S; 18°27'30.45"E | Absent  | This study |
| South Africa | Camps Bay                       | 33°57'11.26"S; 18°22'27.61"E | Absent  | This study |
| South Africa | Scarborough                     | 34°11'55.95"S; 18°22'16.49"E | Present | This study |
| South Africa | Outland Point                   | 34°14'20.82"S; 18°28'38.02"E | Present | This study |
| South Africa | Pringle Bay                     | 34°20'16.52"S; 18°49'41.04"E | Present | This study |
| South Africa | Betty's Bay                     | 34°21'23.82"S; 18°55'59.54"E | Present | This study |
| South Africa | Kleinmond                       | 34°20'37.84"S; 19°02'12.05"E | Present | This study |
| South Africa | Hermanus                        | 34°24'40.64"S; 19°15'40.67"E | Present | This study |
| South Africa | Gans Bay                        | 34°33'17.92"S; 19°21'49.38"E | Present | This study |
| South Africa | Cape Aghullas                   | 34°49'26.40"S; 20°01'01.59"E | Present | This study |
| South Africa | Arniston                        | 34°40'08.12"S; 20°14'05.13"E | Present | This study |
| South Africa | Mossel Bay-lighthouse           | 34°10'58.42"S; 22°09'30.73"E | Present | This study |
| South Africa | Mossel Bay-Dias strand          | 34°10'27.36"S; 22°08'09.70"E | Present | This study |
| South Africa | Mossel Bay-Hartenbos            | 34°09'56.22"S; 22°06'51.08"E | Present | This study |
| South Africa | Glentana                        | 34°03'07.41"S; 22°19'19.01"E | Present | This study |
| South Africa | Wilderness                      | 33°59'49.68"S; 22°33'57.53"E | Present | This study |
| South Africa | Sedgefield                      | 34°01'44.56"S; 22°46'05.08"E | Present | This study |
| South Africa | Brenton-on-Sea                  | 34°04'28.83"S; 23°01'12.56"E | Present | This study |
| South Africa | Robberg-open                    | 34°06'08.06"S; 23°22'52.92"E | Present | This study |
| South Africa | Robberg-in                      | 34°05'57.04"S; 23°22'37.86"E | Present | This study |
| South Africa | Plettenberg Bay-Beacon Isle     | 34°03'35.65"S; 23°22'50.22"E | Present | This study |
| South Africa | Plettenberg Bay-Lookout         | 34°03'06.08"S; 23°22'39.02"E | Present | This study |
| South Africa | Pletternberg Bay-Keurboomstrand | 34°00'17.78"S; 23°27'18.61"E | Present | This study |
| South Africa | Oubosstrand                     | 34°04'22.88"S; 24°13'29.60"E | Present | This study |

|              |                           |                              |         |            |
|--------------|---------------------------|------------------------------|---------|------------|
| South Africa | Seal Point                | 34°12'35.27"S; 24°49'31.96"E | Present | This study |
| South Africa | Sea Vista                 | 34°10'15.24"S; 24°50'05.23"E | Present | This study |
| South Africa | Jeffrey's Bay             | 34°03'37.00"S; 24°55'43.64"E | Present | This study |
| South Africa | Noordkloofspunt           | 34°01'34.07"S; 24°55'50.90"E | Present | This study |
| South Africa | Kini Bay                  | 34°01'17.91"S; 25°22'48.39"E | Present | This study |
| South Africa | Skoenmakerskop            | 34°02'28.06"S; 25°32'01.70"E | Present | This study |
| South Africa | Chelsea Point             | 34°02'45.66"S; 25°38'04.55"E | Present | This study |
| South Africa | Port Elizabeth-Bird Rock  | 33°59'00.57"S; 25°40'17.17"E | Present | This study |
| South Africa | Port Elizabeth-Shark Rock | 33°58'47.18"S; 25°39'28.38"E | Present | This study |
| South Africa | Port Elizabeth-Deal Park  | 33°52'54.56"S; 25°37'37.39"E | Present | This study |
| South Africa | Hougham Park              | 33°45'17.09"S; 25°46'01.20"E | Present | This study |
| South Africa | Kenton-on-Sea             | 33°41'37.49"S; 26°40'13.70"E | Present | This study |
| South Africa | Old Womans                | 33°28'56.45"S; 27°09'06.98"E | Present | This study |
| South Africa | Kayser's Beach            | 33°12'44.21"S; 27°36'41.05"E | Present | This study |
| South Africa | Kidd's Beach              | 33°08'49.12"S; 27°42'11.29"E | Present | This study |
| South Africa | Gonubie                   | 32°56'18.43"S; 28°01'58.06"E | Present | This study |
| South Africa | Glen Muir                 | 32°53'04.40"S; 28°06'00.23"E | Present | This study |
| South Africa | Haga Haga                 | 32°45'54.29"S; 28°14'56.51"E | Present | This study |
| South Africa | Morgan Bay                | 32°42'36.11"S; 28°20'30.00"E | Present | This study |
| South Africa | Kei mounth                | 32°41'03.70"S; 28°22'56.63"E | Present | This study |
| South Africa | Port St Johns             | 31°39'15.23"S; 29°30'56.40"E | Present | This study |
| South Africa | Port Edward               | 31°03'15.39"S; 30°13'42.30"E | Present | This study |
| South Africa | Durban                    | 29°51'10.77"S; 31°02'27.68"E | Present | This study |
| South Africa | Ballito                   | 29°32'42.96"S; 31°12'57.11"E | Present | This study |
| South Africa | Mapelane                  | 28°24'27.04"S; 32°25'37.35"E | Present | This study |
| South Africa | Kosi Bay                  | 27°00'45.82"S; 32°52'02.40"E | Present | This study |
| South Africa | Marion Island             | 46°49'57.95"S; 37°47'13.61"E | Absent  | This study |
| Mozambique   | Punta Douro               | 26°50'39.15"S; 32°53'41.39"E | Present | This study |
| Mozambique   | Praia de Xai-Xai          | 25°06'42.09"S; 33°45'17.90"E | Present | This study |
| Mozambique   | Praia de Závora           | 24°31'15.10"S; 35°12'22.40"E | Present | This study |
| Mozambique   | Baía de Inhambane         | 23°52'04.68"S; 35°22'47.26"E | Absent  | This study |
| Mozambique   | Chicamane                 | 21°53'09.91"S; 35°18'18.13"E | Absent  | This study |
| Mozambique   | Macunhe                   | 21°50'30.97"S; 35°17'43.32"E | Absent  | This study |
| Mozambique   | Nhagonzo                  | 21°43'50.44"S; 35°17'01.16"E | Absent  | This study |
| Mozambique   | Bazaruto                  | 21°32'25.26"S; 35°28'14.60"E | Absent  | This study |
| Yemen        | Ash-shehr                 | 14°44'49.88"N; 49°35'31.46"E | Present | 12         |
| Yemen        | Bandar Fuqum              | 12°44'52.37"N; 44°49'31.63"E | Present | 13         |
| Yemen        | Ras Marbat                | 12°47'08.56"N; 44°58'17.13"E | Present | 13         |
| Yemen        | Sira Island               | 12°46'37.04"N; 45°02'55.42"E | Present | 13         |
| Oman         | Salalah - Raysut          | 16°59'49.12"N; 54°05'23.18"E | Present | 14         |
| Oman         | Muscat                    | 23°37'19.37"N; 58°35'22.14"E | Present | 15         |

Table S8 – Environmental variables used to model *P. perna* likelihood of presence. SST indicates sea surface temperature. SAT indicates surface air temperature.

| Predictors (units) | Study area    |        | Presences     |        |
|--------------------|---------------|--------|---------------|--------|
|                    | Min-Max       | Mean   | Min-Max       | Mean   |
| Cloud cover        | 0.069-0.943   | 0.531  | 0.251-0.872   | 0.49   |
| Waves (m)          | 0.388-5.774   | 2.008  | 0.625-3.829   | 2.183  |
| Minimum SST (°C)   | -1.585-28.827 | 17.403 | 13.817-25.977 | 17.316 |
| Maximum SST        | 6.979-37.600  | 27.335 | 18.908-31.705 | 24.028 |
| Minimum SAT (°C)   | -7.757-25.477 | 12.414 | 5.925-23.069  | 13.878 |
| Maximum SAT        | 8.298-35.289  | 28.169 | 22.055-34.562 | 26.511 |
| Salinity           | 1.634-41.475  | 34.66  | 33.953-37.277 | 35.827 |
| Nitrate (µmol/L)   | 0.003-12.494  | 1.355  | 0.548-6.695   | 2.12   |
| Phosphate          | 0.0184-       | 0.229  | 0.049-0.995   | 0.33   |

Table S9 – Microsatellite data of 732 individuals of *P. perna* used in nuclear genetic analyses. POP refers to populations as in Supplementary Table S6. The 0 value depicted null alleles.

| POP | P08      |          | P16      |          | P20      |          | P26      |          | P01      |          | P05      |          | P27      |          | P02      |          |
|-----|----------|----------|----------|----------|----------|----------|----------|----------|----------|----------|----------|----------|----------|----------|----------|----------|
|     | Allele A | Allele B | Allele A | Allele B | Allele A | Allele B | Allele A | Allele B | Allele A | Allele B | Allele A | Allele B | Allele A | Allele B | Allele A | Allele B |
| KR  | 111      | 111      | 103      | 172      | 213      | 213      | 100      | 109      | 157      | 157      | 130      | 132      | 108      | 140      | 112      | 112      |
| KR  | 111      | 126      | 0        | 0        | 207      | 326      | 100      | 104      | 165      | 167      | 127      | 132      | 108      | 142      | 112      | 116      |
| KR  | 115      | 115      | 98       | 103      | 330      | 356      | 94       | 98       | 165      | 167      | 119      | 127      | 136      | 153      | 112      | 112      |
| KR  | 111      | 115      | 103      | 103      | 202      | 202      | 92       | 100      | 169      | 169      | 115      | 125      | 108      | 138      | 112      | 112      |
| KR  | 111      | 119      | 107      | 122      | 353      | 353      | 100      | 102      | 165      | 167      | 109      | 119      | 83       | 142      | 112      | 112      |
| KR  | 115      | 115      | 105      | 105      | 209      | 215      | 100      | 107      | 166      | 167      | 115      | 117      | 144      | 174      | 112      | 120      |
| KR  | 111      | 115      | 103      | 132      | 215      | 215      | 96       | 98       | 175      | 175      | 123      | 130      | 108      | 146      | 112      | 112      |
| KR  | 115      | 119      | 103      | 103      | 351      | 360      | 98       | 104      | 167      | 167      | 121      | 123      | 103      | 178      | 112      | 112      |
| KR  | 119      | 126      | 153      | 153      | 213      | 311      | 100      | 102      | 158      | 165      | 123      | 123      | 140      | 142      | 112      | 280      |
| KR  | 111      | 126      | 103      | 105      | 207      | 317      | 98       | 100      | 167      | 167      | 121      | 123      | 140      | 142      | 112      | 112      |
| KR  | 111      | 119      | 103      | 103      | 202      | 315      | 98       | 102      | 167      | 167      | 115      | 117      | 108      | 138      | 112      | 220      |
| KR  | 111      | 119      | 103      | 103      | 338      | 338      | 102      | 106      | 160      | 167      | 119      | 136      | 108      | 138      | 112      | 112      |
| KR  | 115      | 126      | 115      | 115      | 200      | 202      | 102      | 104      | 157      | 157      | 119      | 125      | 108      | 165      | 112      | 112      |
| KR  | 115      | 119      | 103      | 113      | 230      | 344      | 102      | 115      | 157      | 167      | 132      | 132      | 108      | 153      | 112      | 290      |
| KR  | 111      | 115      | 103      | 103      | 206      | 334      | 94       | 98       | 169      | 177      | 119      | 121      | 108      | 140      | 112      | 112      |
| KR  | 111      | 115      | 103      | 113      | 207      | 310      | 104      | 104      | 157      | 165      | 115      | 130      | 108      | 108      | 112      | 116      |
| KR  | 111      | 115      | 103      | 126      | 202      | 226      | 92       | 107      | 171      | 173      | 121      | 130      | 140      | 174      | 112      | 114      |
| KR  | 115      | 115      | 105      | 105      | 300      | 355      | 102      | 236      | 173      | 173      | 113      | 119      | 110      | 144      | 112      | 112      |
| KR  | 111      | 115      | 122      | 122      | 212      | 356      | 102      | 109      | 165      | 165      | 119      | 134      | 140      | 151      | 112      | 112      |
| KR  | 115      | 115      | 98       | 98       | 221      | 295      | 102      | 102      | 167      | 167      | 115      | 115      | 108      | 142      | 112      | 112      |
| KR  | 111      | 115      | 105      | 105      | 358      | 358      | 102      | 166      | 165      | 169      | 123      | 130      | 113      | 142      | 106      | 112      |
| KR  | 111      | 115      | 115      | 115      | 249      | 353      | 94       | 208      | 162      | 171      | 119      | 134      | 146      | 159      | 112      | 112      |

|    |     |     |     |     |     |     |     |     |     |     |     |     |     |     |     |     |
|----|-----|-----|-----|-----|-----|-----|-----|-----|-----|-----|-----|-----|-----|-----|-----|-----|
| KR | 111 | 119 | 103 | 103 | 221 | 221 | 96  | 102 | 167 | 173 | 115 | 117 | 140 | 140 | 89  | 110 |
| KR | 111 | 119 | 105 | 118 | 204 | 215 | 104 | 107 | 160 | 167 | 107 | 119 | 108 | 174 | 0   | 0   |
| KR | 111 | 115 | 105 | 113 | 291 | 338 | 100 | 102 | 171 | 185 | 119 | 134 | 108 | 134 | 112 | 112 |
| KR | 111 | 119 | 103 | 103 | 308 | 334 | 104 | 107 | 165 | 167 | 125 | 150 | 108 | 138 | 0   | 0   |
| KR | 111 | 115 | 109 | 109 | 226 | 353 | 98  | 100 | 157 | 169 | 113 | 127 | 108 | 108 | 112 | 259 |
| KR | 111 | 111 | 109 | 134 | 309 | 309 | 102 | 104 | 167 | 167 | 115 | 115 | 138 | 140 | 112 | 417 |
| KR | 111 | 111 | 103 | 126 | 206 | 317 | 94  | 102 | 167 | 169 | 115 | 115 | 146 | 153 | 112 | 112 |
| KR | 111 | 119 | 126 | 126 | 321 | 338 | 102 | 104 | 165 | 165 | 117 | 119 | 108 | 140 | 112 | 112 |
| BZ | 115 | 119 | 140 | 140 | 332 | 332 | 102 | 107 | 165 | 165 | 115 | 119 | 138 | 153 | 110 | 112 |
| BZ | 111 | 115 | 103 | 103 | 234 | 370 | 96  | 104 | 165 | 165 | 115 | 123 | 108 | 140 | 112 | 135 |
| BZ | 111 | 126 | 103 | 105 | 202 | 217 | 100 | 100 | 167 | 167 | 119 | 119 | 140 | 202 | 112 | 112 |
| BZ | 107 | 115 | 103 | 103 | 202 | 368 | 102 | 102 | 165 | 175 | 115 | 127 | 108 | 151 | 112 | 112 |
| BZ | 115 | 126 | 103 | 103 | 326 | 368 | 102 | 104 | 167 | 167 | 117 | 125 | 107 | 144 | 110 | 112 |
| BZ | 115 | 119 | 102 | 102 | 326 | 364 | 100 | 106 | 171 | 171 | 130 | 138 | 108 | 108 | 89  | 112 |
| BZ | 111 | 115 | 103 | 126 | 206 | 375 | 100 | 102 | 165 | 167 | 115 | 121 | 108 | 140 | 112 | 112 |
| BZ | 111 | 115 | 0   | 0   | 206 | 347 | 100 | 106 | 157 | 167 | 117 | 130 | 110 | 140 | 112 | 112 |
| BZ | 111 | 111 | 103 | 120 | 305 | 379 | 102 | 106 | 157 | 162 | 130 | 134 | 108 | 108 | 112 | 131 |
| BZ | 111 | 115 | 103 | 103 | 192 | 383 | 102 | 102 | 167 | 177 | 115 | 121 | 140 | 144 | 110 | 112 |
| BZ | 115 | 115 | 105 | 120 | 332 | 332 | 98  | 197 | 165 | 165 | 115 | 136 | 138 | 138 | 112 | 251 |
| BZ | 115 | 115 | 128 | 128 | 353 | 364 | 106 | 109 | 169 | 173 | 123 | 125 | 138 | 163 | 112 | 112 |
| BZ | 111 | 119 | 124 | 124 | 207 | 364 | 96  | 100 | 157 | 157 | 123 | 125 | 108 | 138 | 112 | 112 |
| BZ | 111 | 111 | 98  | 111 | 202 | 313 | 92  | 104 | 167 | 167 | 115 | 132 | 108 | 108 | 112 | 112 |
| BZ | 111 | 115 | 103 | 103 | 202 | 351 | 98  | 102 | 165 | 165 | 119 | 125 | 163 | 170 | 112 | 290 |
| BZ | 111 | 115 | 103 | 103 | 207 | 347 | 98  | 104 | 165 | 165 | 119 | 123 | 140 | 142 | 112 | 112 |
| BZ | 115 | 115 | 100 | 105 | 207 | 246 | 98  | 104 | 165 | 165 | 117 | 140 | 144 | 149 | 112 | 131 |
| BZ | 111 | 119 | 126 | 126 | 209 | 362 | 100 | 100 | 165 | 171 | 115 | 117 | 138 | 146 | 112 | 112 |
| BZ | 111 | 111 | 103 | 103 | 225 | 315 | 98  | 102 | 165 | 165 | 123 | 138 | 138 | 149 | 112 | 118 |
| BZ | 107 | 115 | 103 | 103 | 226 | 362 | 102 | 102 | 167 | 167 | 119 | 127 | 138 | 140 | 112 | 290 |
| BZ | 119 | 119 | 260 | 260 | 283 | 360 | 98  | 106 | 167 | 167 | 115 | 115 | 140 | 140 | 0   | 0   |
| BZ | 115 | 119 | 105 | 105 | 215 | 344 | 100 | 104 | 165 | 165 | 119 | 152 | 108 | 146 | 112 | 112 |
| BZ | 111 | 111 | 98  | 103 | 370 | 371 | 102 | 104 | 169 | 171 | 117 | 119 | 108 | 138 | 112 | 273 |
| BZ | 111 | 111 | 103 | 128 | 206 | 207 | 98  | 98  | 165 | 169 | 130 | 130 | 108 | 136 | 112 | 112 |
| BZ | 111 | 111 | 107 | 107 | 0   | 0   | 102 | 106 | 167 | 175 | 119 | 130 | 108 | 108 | 112 | 245 |
| BZ | 111 | 111 | 102 | 102 | 234 | 358 | 100 | 100 | 158 | 167 | 113 | 134 | 108 | 187 | 112 | 112 |
| BZ | 111 | 111 | 128 | 128 | 334 | 336 | 100 | 102 | 165 | 173 | 115 | 136 | 110 | 138 | 112 | 112 |
| BZ | 111 | 115 | 103 | 103 | 295 | 295 | 107 | 109 | 165 | 169 | 115 | 117 | 108 | 144 | 112 | 112 |
| BZ | 111 | 115 | 102 | 126 | 190 | 307 | 94  | 98  | 171 | 171 | 115 | 121 | 140 | 153 | 112 | 112 |
| BZ | 111 | 115 | 105 | 124 | 332 | 371 | 100 | 102 | 159 | 167 | 119 | 127 | 108 | 151 | 112 | 255 |
| BZ | 111 | 111 | 103 | 103 | 287 | 356 | 98  | 107 | 165 | 167 | 123 | 125 | 139 | 139 | 112 | 240 |
| BZ | 111 | 115 | 0   | 0   | 213 | 345 | 102 | 106 | 165 | 167 | 119 | 123 | 108 | 140 | 89  | 110 |
| OR | 111 | 115 | 103 | 103 | 200 | 206 | 98  | 106 | 165 | 167 | 119 | 121 | 108 | 108 | 0   | 0   |
| OR | 111 | 111 | 103 | 103 | 200 | 321 | 102 | 102 | 155 | 167 | 115 | 115 | 108 | 163 | 112 | 114 |
| OR | 115 | 115 | 107 | 115 | 204 | 209 | 92  | 92  | 167 | 169 | 119 | 123 | 110 | 140 | 0   | 0   |
| OR | 111 | 115 | 103 | 103 | 308 | 345 | 100 | 104 | 167 | 167 | 123 | 138 | 165 | 193 | 112 | 112 |

|    |     |     |     |     |     |     |     |     |     |     |     |     |     |     |     |     |
|----|-----|-----|-----|-----|-----|-----|-----|-----|-----|-----|-----|-----|-----|-----|-----|-----|
| OR | 111 | 115 | 136 | 136 | 200 | 317 | 98  | 109 | 165 | 167 | 115 | 127 | 108 | 168 | 112 | 261 |
| OR | 111 | 119 | 0   | 0   | 204 | 209 | 102 | 104 | 165 | 165 | 115 | 132 | 108 | 146 | 112 | 112 |
| OR | 111 | 111 | 128 | 128 | 307 | 313 | 98  | 104 | 157 | 171 | 115 | 130 | 110 | 138 | 112 | 114 |
| OR | 111 | 111 | 103 | 103 | 198 | 309 | 98  | 104 | 165 | 167 | 119 | 134 | 110 | 144 | 112 | 269 |
| OR | 115 | 119 | 144 | 144 | 200 | 379 | 98  | 104 | 165 | 165 | 125 | 125 | 101 | 112 | 112 | 135 |
| OR | 111 | 111 | 103 | 107 | 213 | 315 | 100 | 104 | 158 | 167 | 123 | 123 | 108 | 144 | 112 | 112 |
| OR | 111 | 119 | 126 | 126 | 202 | 321 | 98  | 102 | 167 | 171 | 125 | 145 | 108 | 151 | 112 | 112 |
| OR | 111 | 115 | 103 | 155 | 228 | 345 | 100 | 102 | 165 | 167 | 115 | 115 | 108 | 161 | 112 | 129 |
| OR | 111 | 111 | 0   | 0   | 328 | 360 | 98  | 100 | 165 | 167 | 119 | 127 | 140 | 142 | 110 | 110 |
| OR | 111 | 119 | 103 | 103 | 207 | 356 | 102 | 106 | 167 | 171 | 119 | 132 | 108 | 163 | 110 | 112 |
| OR | 111 | 115 | 115 | 124 | 349 | 349 | 102 | 102 | 165 | 177 | 116 | 121 | 134 | 140 | 0   | 0   |
| OR | 111 | 119 | 103 | 103 | 307 | 311 | 102 | 104 | 167 | 167 | 117 | 119 | 138 | 146 | 112 | 112 |
| OR | 111 | 111 | 0   | 0   | 309 | 309 | 90  | 102 | 157 | 165 | 115 | 130 | 108 | 149 | 112 | 112 |
| OR | 115 | 119 | 136 | 136 | 200 | 338 | 100 | 102 | 157 | 169 | 0   | 0   | 110 | 157 | 112 | 112 |
| OR | 111 | 115 | 113 | 128 | 209 | 209 | 98  | 104 | 165 | 165 | 119 | 134 | 108 | 142 | 112 | 137 |
| OR | 111 | 111 | 262 | 262 | 213 | 334 | 106 | 107 | 165 | 167 | 115 | 119 | 108 | 182 | 112 | 118 |
| OR | 111 | 119 | 103 | 103 | 221 | 330 | 98  | 134 | 167 | 175 | 125 | 132 | 107 | 108 | 0   | 0   |
| OR | 111 | 111 | 103 | 103 | 190 | 321 | 102 | 109 | 165 | 167 | 127 | 132 | 108 | 136 | 112 | 290 |
| PN | 115 | 119 | 157 | 157 | 217 | 351 | 94  | 109 | 168 | 171 | 115 | 130 | 108 | 138 | 112 | 131 |
| PN | 111 | 111 | 0   | 0   | 209 | 218 | 98  | 102 | 167 | 169 | 115 | 115 | 108 | 153 | 112 | 112 |
| PN | 111 | 111 | 98  | 98  | 215 | 215 | 102 | 106 | 165 | 167 | 115 | 115 | 108 | 138 | 112 | 112 |
| PN | 111 | 115 | 102 | 103 | 221 | 313 | 94  | 106 | 157 | 171 | 115 | 119 | 144 | 155 | 112 | 112 |
| PN | 115 | 119 | 98  | 103 | 224 | 234 | 106 | 201 | 167 | 175 | 132 | 169 | 108 | 155 | 112 | 112 |
| PN | 111 | 123 | 103 | 103 | 299 | 342 | 98  | 294 | 165 | 167 | 127 | 138 | 108 | 128 | 112 | 288 |
| PN | 119 | 126 | 103 | 103 | 221 | 303 | 102 | 109 | 167 | 167 | 115 | 121 | 140 | 142 | 112 | 112 |
| PN | 111 | 115 | 103 | 144 | 220 | 321 | 102 | 106 | 167 | 167 | 121 | 125 | 108 | 144 | 112 | 112 |
| PN | 111 | 123 | 103 | 103 | 192 | 222 | 102 | 102 | 167 | 167 | 123 | 130 | 108 | 157 | 112 | 112 |
| PN | 111 | 115 | 105 | 107 | 0   | 0   | 107 | 111 | 167 | 167 | 125 | 140 | 138 | 140 | 112 | 112 |
| PN | 111 | 119 | 103 | 195 | 309 | 344 | 102 | 104 | 167 | 167 | 115 | 134 | 108 | 110 | 112 | 114 |
| PN | 111 | 115 | 115 | 136 | 225 | 321 | 98  | 100 | 157 | 175 | 127 | 140 | 108 | 108 | 112 | 112 |
| PN | 111 | 111 | 103 | 103 | 311 | 351 | 94  | 100 | 165 | 165 | 115 | 130 | 108 | 110 | 112 | 257 |
| PN | 111 | 115 | 103 | 105 | 309 | 360 | 98  | 102 | 165 | 171 | 132 | 143 | 108 | 108 | 112 | 112 |
| PN | 115 | 126 | 103 | 103 | 340 | 340 | 100 | 104 | 157 | 157 | 113 | 130 | 108 | 142 | 112 | 135 |
| PN | 111 | 115 | 115 | 115 | 218 | 383 | 102 | 102 | 167 | 167 | 123 | 130 | 159 | 174 | 112 | 135 |
| PN | 115 | 115 | 103 | 113 | 204 | 207 | 104 | 107 | 165 | 173 | 119 | 132 | 155 | 157 | 112 | 112 |
| PN | 111 | 115 | 103 | 105 | 217 | 334 | 102 | 104 | 165 | 175 | 121 | 121 | 108 | 108 | 112 | 112 |
| PN | 111 | 112 | 0   | 0   | 328 | 330 | 98  | 104 | 171 | 181 | 116 | 121 | 149 | 170 | 112 | 112 |
| PN | 111 | 119 | 103 | 103 | 202 | 383 | 98  | 104 | 165 | 167 | 109 | 115 | 108 | 144 | 112 | 114 |
| PN | 111 | 115 | 0   | 0   | 287 | 332 | 102 | 104 | 167 | 169 | 125 | 130 | 138 | 138 | 110 | 112 |
| PN | 111 | 123 | 103 | 105 | 206 | 246 | 102 | 106 | 167 | 167 | 115 | 121 | 108 | 138 | 110 | 112 |
| PN | 111 | 111 | 103 | 105 | 207 | 330 | 98  | 98  | 165 | 165 | 119 | 123 | 138 | 140 | 110 | 110 |
| PN | 111 | 119 | 103 | 144 | 206 | 308 | 102 | 109 | 167 | 167 | 115 | 121 | 108 | 108 | 112 | 112 |
| PN | 115 | 119 | 103 | 128 | 383 | 396 | 98  | 106 | 167 | 169 | 121 | 127 | 108 | 157 | 112 | 257 |
| PN | 115 | 115 | 103 | 105 | 0   | 0   | 98  | 107 | 155 | 165 | 115 | 125 | 108 | 163 | 112 | 114 |

|    |     |     |     |     |     |     |     |     |     |     |     |     |     |     |     |     |
|----|-----|-----|-----|-----|-----|-----|-----|-----|-----|-----|-----|-----|-----|-----|-----|-----|
| PN | 111 | 111 | 0   | 0   | 192 | 324 | 104 | 106 | 157 | 175 | 119 | 123 | 140 | 140 | 112 | 112 |
| PN | 111 | 111 | 103 | 103 | 207 | 319 | 102 | 104 | 165 | 169 | 111 | 121 | 108 | 142 | 112 | 112 |
| PN | 111 | 111 | 103 | 103 | 217 | 315 | 102 | 102 | 163 | 167 | 121 | 132 | 108 | 165 | 112 | 235 |
| PN | 111 | 111 | 107 | 126 | 320 | 358 | 98  | 106 | 167 | 167 | 109 | 115 | 140 | 155 | 0   | 0   |
| PN | 111 | 115 | 124 | 124 | 292 | 321 | 102 | 104 | 165 | 167 | 132 | 145 | 108 | 182 | 112 | 112 |
| CG | 111 | 111 | 203 | 203 | 200 | 209 | 98  | 107 | 165 | 167 | 127 | 134 | 108 | 108 | 112 | 112 |
| CG | 111 | 119 | 138 | 138 | 345 | 345 | 92  | 94  | 165 | 165 | 115 | 127 | 108 | 138 | 112 | 116 |
| CG | 111 | 115 | 98  | 98  | 206 | 368 | 104 | 176 | 165 | 173 | 113 | 115 | 140 | 142 | 112 | 253 |
| CG | 111 | 111 | 0   | 0   | 321 | 345 | 100 | 102 | 165 | 167 | 115 | 119 | 108 | 163 | 89  | 112 |
| CG | 111 | 115 | 0   | 0   | 356 | 379 | 100 | 104 | 165 | 171 | 121 | 127 | 138 | 161 | 112 | 112 |
| CG | 111 | 119 | 0   | 0   | 202 | 217 | 92  | 98  | 167 | 171 | 115 | 117 | 144 | 149 | 112 | 112 |
| CG | 115 | 119 | 103 | 103 | 330 | 337 | 98  | 102 | 165 | 165 | 119 | 125 | 144 | 163 | 112 | 292 |
| CG | 115 | 130 | 118 | 130 | 299 | 299 | 104 | 104 | 167 | 167 | 109 | 132 | 138 | 140 | 110 | 112 |
| CG | 111 | 111 | 124 | 124 | 319 | 330 | 98  | 102 | 167 | 167 | 117 | 127 | 136 | 157 | 112 | 112 |
| CG | 111 | 115 | 120 | 120 | 224 | 332 | 104 | 106 | 165 | 171 | 115 | 119 | 138 | 149 | 112 | 118 |
| CG | 115 | 119 | 0   | 0   | 206 | 347 | 102 | 102 | 167 | 167 | 115 | 138 | 108 | 108 | 112 | 112 |
| CG | 111 | 115 | 107 | 107 | 304 | 345 | 102 | 109 | 165 | 170 | 115 | 130 | 108 | 140 | 112 | 112 |
| CG | 119 | 119 | 142 | 142 | 188 | 383 | 102 | 104 | 160 | 160 | 115 | 119 | 136 | 140 | 112 | 112 |
| BM | 111 | 126 | 103 | 105 | 321 | 353 | 102 | 109 | 167 | 167 | 125 | 130 | 108 | 161 | 112 | 112 |
| BM | 111 | 115 | 103 | 122 | 305 | 313 | 98  | 102 | 171 | 171 | 115 | 123 | 107 | 108 | 114 | 114 |
| BM | 111 | 115 | 105 | 134 | 321 | 321 | 100 | 104 | 165 | 167 | 117 | 123 | 108 | 144 | 112 | 112 |
| BM | 111 | 115 | 103 | 103 | 206 | 330 | 102 | 201 | 165 | 171 | 119 | 123 | 138 | 140 | 112 | 135 |
| BM | 111 | 111 | 103 | 103 | 207 | 241 | 109 | 164 | 167 | 167 | 115 | 132 | 108 | 233 | 110 | 112 |
| BM | 111 | 119 | 103 | 103 | 202 | 379 | 92  | 102 | 165 | 165 | 113 | 119 | 108 | 108 | 112 | 112 |
| BM | 119 | 119 | 124 | 208 | 336 | 336 | 109 | 109 | 158 | 181 | 123 | 130 | 138 | 140 | 112 | 112 |
| BM | 111 | 120 | 105 | 105 | 204 | 324 | 102 | 104 | 167 | 167 | 123 | 125 | 140 | 146 | 112 | 112 |
| BM | 111 | 111 | 103 | 147 | 226 | 313 | 106 | 205 | 167 | 171 | 115 | 136 | 140 | 142 | 112 | 112 |
| BM | 111 | 111 | 103 | 103 | 202 | 211 | 98  | 100 | 157 | 167 | 123 | 123 | 111 | 140 | 112 | 112 |
| BM | 111 | 115 | 103 | 103 | 215 | 221 | 100 | 104 | 165 | 165 | 125 | 125 | 108 | 108 | 112 | 112 |
| BM | 111 | 115 | 0   | 0   | 202 | 345 | 98  | 102 | 165 | 165 | 113 | 119 | 108 | 186 | 112 | 261 |
| BM | 111 | 126 | 103 | 105 | 226 | 319 | 104 | 106 | 157 | 165 | 119 | 143 | 108 | 108 | 112 | 112 |
| BM | 111 | 111 | 115 | 115 | 202 | 204 | 102 | 109 | 165 | 169 | 117 | 121 | 165 | 176 | 106 | 112 |
| BM | 111 | 115 | 103 | 126 | 206 | 237 | 98  | 98  | 155 | 167 | 119 | 125 | 108 | 186 | 112 | 210 |
| BM | 111 | 115 | 111 | 140 | 206 | 373 | 104 | 109 | 157 | 165 | 113 | 115 | 140 | 151 | 112 | 112 |
| BM | 111 | 115 | 0   | 0   | 230 | 364 | 98  | 106 | 167 | 171 | 115 | 127 | 142 | 144 | 112 | 112 |
| BM | 111 | 119 | 0   | 0   | 200 | 336 | 107 | 107 | 165 | 171 | 130 | 140 | 113 | 140 | 112 | 112 |
| BM | 115 | 119 | 0   | 0   | 202 | 209 | 98  | 113 | 158 | 165 | 123 | 132 | 108 | 155 | 112 | 112 |
| BM | 111 | 119 | 103 | 103 | 351 | 391 | 100 | 227 | 155 | 157 | 119 | 136 | 112 | 151 | 112 | 112 |
| BM | 111 | 111 | 107 | 218 | 213 | 316 | 102 | 102 | 159 | 165 | 109 | 134 | 108 | 108 | 112 | 222 |
| BM | 111 | 123 | 103 | 107 | 0   | 0   | 96  | 102 | 165 | 173 | 117 | 123 | 132 | 136 | 112 | 112 |
| BM | 111 | 111 | 103 | 103 | 217 | 326 | 94  | 98  | 165 | 167 | 115 | 121 | 161 | 180 | 110 | 112 |
| BM | 111 | 111 | 103 | 103 | 202 | 338 | 98  | 113 | 157 | 171 | 115 | 127 | 108 | 146 | 112 | 112 |
| BM | 111 | 115 | 105 | 105 | 321 | 330 | 102 | 104 | 168 | 170 | 119 | 132 | 108 | 140 | 112 | 112 |
| BM | 111 | 126 | 115 | 128 | 200 | 204 | 102 | 102 | 167 | 167 | 125 | 132 | 140 | 151 | 112 | 112 |



|    |     |     |     |     |     |     |     |     |     |     |     |     |     |     |     |     |
|----|-----|-----|-----|-----|-----|-----|-----|-----|-----|-----|-----|-----|-----|-----|-----|-----|
| BM | 111 | 119 | 113 | 113 | 206 | 338 | 102 | 109 | 167 | 167 | 119 | 167 | 108 | 149 | 112 | 112 |
| BM | 119 | 119 | 103 | 103 | 230 | 379 | 100 | 102 | 167 | 171 | 115 | 119 | 138 | 155 | 112 | 112 |
| BM | 111 | 111 | 98  | 128 | 215 | 317 | 98  | 102 | 165 | 167 | 117 | 125 | 138 | 159 | 112 | 139 |
| BM | 111 | 111 | 103 | 103 | 221 | 355 | 94  | 98  | 165 | 165 | 115 | 134 | 108 | 180 | 112 | 112 |
| BM | 115 | 115 | 128 | 128 | 207 | 221 | 102 | 106 | 167 | 171 | 130 | 150 | 134 | 134 | 112 | 112 |
| BM | 111 | 115 | 105 | 105 | 347 | 397 | 102 | 104 | 165 | 167 | 115 | 123 | 138 | 155 | 112 | 235 |
| AM | 119 | 119 | 103 | 107 | 338 | 338 | 102 | 107 | 165 | 165 | 132 | 134 | 142 | 159 | 112 | 273 |
| AM | 111 | 115 | 0   | 0   | 204 | 215 | 102 | 106 | 165 | 167 | 123 | 130 | 110 | 138 | 112 | 114 |
| AM | 111 | 119 | 103 | 103 | 200 | 326 | 98  | 109 | 167 | 167 | 123 | 130 | 108 | 161 | 112 | 112 |
| AM | 111 | 115 | 103 | 103 | 313 | 318 | 102 | 107 | 165 | 167 | 115 | 115 | 138 | 170 | 112 | 112 |
| AM | 119 | 119 | 0   | 0   | 206 | 217 | 94  | 100 | 167 | 171 | 115 | 134 | 146 | 149 | 112 | 112 |
| AM | 111 | 111 | 142 | 142 | 219 | 334 | 102 | 102 | 171 | 171 | 115 | 134 | 108 | 108 | 112 | 112 |
| AM | 111 | 115 | 103 | 103 | 279 | 307 | 100 | 102 | 167 | 169 | 123 | 130 | 108 | 146 | 106 | 112 |
| AM | 107 | 111 | 128 | 128 | 202 | 305 | 100 | 102 | 167 | 167 | 115 | 121 | 155 | 186 | 112 | 112 |
| AM | 111 | 115 | 103 | 105 | 326 | 362 | 106 | 106 | 167 | 167 | 125 | 132 | 108 | 149 | 110 | 112 |
| AM | 111 | 111 | 113 | 113 | 358 | 364 | 100 | 102 | 165 | 165 | 113 | 119 | 108 | 146 | 112 | 112 |
| AM | 111 | 111 | 103 | 103 | 353 | 360 | 104 | 113 | 165 | 171 | 119 | 127 | 107 | 140 | 112 | 112 |
| AM | 111 | 111 | 0   | 0   | 237 | 371 | 98  | 104 | 167 | 167 | 136 | 138 | 108 | 108 | 112 | 112 |
| AM | 111 | 111 | 262 | 262 | 244 | 244 | 100 | 102 | 167 | 175 | 123 | 125 | 108 | 136 | 112 | 222 |
| AM | 111 | 115 | 0   | 0   | 289 | 334 | 102 | 104 | 165 | 165 | 130 | 130 | 138 | 155 | 112 | 247 |
| AM | 115 | 115 | 103 | 151 | 413 | 413 | 102 | 107 | 171 | 173 | 116 | 123 | 128 | 153 | 112 | 112 |
| AM | 111 | 115 | 103 | 170 | 326 | 349 | 94  | 104 | 165 | 169 | 117 | 119 | 110 | 140 | 112 | 112 |
| AM | 111 | 111 | 103 | 103 | 221 | 315 | 94  | 102 | 163 | 167 | 121 | 140 | 140 | 144 | 112 | 112 |
| AM | 115 | 115 | 100 | 103 | 204 | 317 | 102 | 109 | 171 | 171 | 116 | 127 | 140 | 178 | 112 | 114 |
| AM | 111 | 115 | 103 | 155 | 206 | 347 | 102 | 107 | 167 | 171 | 123 | 125 | 108 | 161 | 112 | 112 |
| AM | 111 | 111 | 174 | 174 | 334 | 356 | 102 | 106 | 165 | 167 | 117 | 145 | 108 | 180 | 0   | 0   |
| AM | 111 | 119 | 0   | 0   | 221 | 386 | 98  | 102 | 165 | 173 | 115 | 119 | 155 | 170 | 112 | 112 |
| AM | 111 | 111 | 103 | 105 | 207 | 340 | 104 | 107 | 167 | 167 | 115 | 117 | 140 | 144 | 0   | 0   |
| AM | 111 | 126 | 118 | 118 | 287 | 287 | 92  | 104 | 165 | 167 | 116 | 116 | 136 | 140 | 112 | 249 |
| AM | 111 | 130 | 105 | 113 | 202 | 383 | 98  | 115 | 167 | 175 | 109 | 127 | 108 | 140 | 112 | 112 |
| AM | 111 | 115 | 103 | 103 | 0   | 0   | 102 | 106 | 165 | 167 | 123 | 127 | 108 | 110 | 112 | 112 |
| AM | 111 | 115 | 103 | 103 | 209 | 347 | 102 | 102 | 177 | 177 | 119 | 130 | 108 | 140 | 112 | 112 |
| AM | 111 | 115 | 115 | 115 | 206 | 206 | 98  | 98  | 165 | 177 | 115 | 115 | 138 | 157 | 112 | 112 |
| AM | 115 | 115 | 103 | 103 | 215 | 342 | 104 | 106 | 167 | 167 | 111 | 125 | 131 | 168 | 112 | 112 |
| AM | 111 | 111 | 103 | 132 | 204 | 223 | 102 | 107 | 165 | 165 | 115 | 125 | 138 | 138 | 89  | 112 |
| AM | 115 | 115 | 103 | 124 | 344 | 344 | 104 | 106 | 158 | 158 | 121 | 125 | 110 | 128 | 112 | 245 |
| AM | 119 | 126 | 103 | 113 | 206 | 309 | 104 | 106 | 165 | 167 | 113 | 127 | 108 | 138 | 112 | 112 |
| AM | 111 | 115 | 103 | 109 | 202 | 344 | 102 | 106 | 165 | 167 | 127 | 127 | 107 | 138 | 112 | 112 |
| AM | 111 | 111 | 103 | 103 | 319 | 370 | 104 | 104 | 165 | 167 | 127 | 132 | 138 | 180 | 112 | 112 |
| LA | 119 | 119 | 103 | 148 | 211 | 317 | 102 | 107 | 165 | 165 | 115 | 125 | 110 | 142 | 112 | 450 |
| LA | 111 | 119 | 103 | 155 | 206 | 318 | 98  | 104 | 170 | 173 | 123 | 127 | 134 | 140 | 112 | 112 |
| LA | 111 | 115 | 103 | 103 | 207 | 237 | 96  | 98  | 165 | 167 | 113 | 115 | 108 | 138 | 112 | 112 |
| LA | 111 | 119 | 103 | 103 | 202 | 207 | 92  | 102 | 165 | 165 | 123 | 127 | 108 | 149 | 112 | 112 |
| LA | 115 | 115 | 98  | 98  | 315 | 342 | 102 | 104 | 165 | 169 | 109 | 115 | 108 | 110 | 112 | 112 |

|    |     |     |     |     |     |     |     |     |     |     |     |     |     |     |     |     |
|----|-----|-----|-----|-----|-----|-----|-----|-----|-----|-----|-----|-----|-----|-----|-----|-----|
| LA | 115 | 126 | 103 | 103 | 303 | 332 | 98  | 100 | 165 | 165 | 121 | 130 | 108 | 140 | 112 | 112 |
| LA | 111 | 111 | 103 | 105 | 336 | 347 | 102 | 106 | 167 | 167 | 115 | 125 | 108 | 140 | 112 | 112 |
| LA | 107 | 111 | 103 | 103 | 213 | 347 | 98  | 102 | 157 | 157 | 127 | 134 | 108 | 108 | 110 | 112 |
| LA | 111 | 115 | 103 | 103 | 204 | 386 | 102 | 104 | 157 | 167 | 117 | 134 | 108 | 138 | 112 | 131 |
| LA | 111 | 115 | 115 | 115 | 206 | 349 | 102 | 168 | 158 | 167 | 115 | 130 | 108 | 132 | 112 | 112 |
| LA | 115 | 119 | 103 | 124 | 383 | 383 | 100 | 102 | 158 | 158 | 123 | 145 | 108 | 111 | 112 | 112 |
| LA | 111 | 119 | 103 | 103 | 311 | 355 | 100 | 102 | 167 | 177 | 109 | 117 | 108 | 140 | 112 | 112 |
| LA | 111 | 115 | 103 | 103 | 360 | 371 | 98  | 98  | 167 | 167 | 115 | 119 | 108 | 149 | 112 | 131 |
| LA | 111 | 111 | 103 | 103 | 206 | 215 | 100 | 102 | 167 | 167 | 115 | 119 | 108 | 134 | 112 | 131 |
| LA | 111 | 115 | 120 | 120 | 200 | 206 | 106 | 106 | 165 | 167 | 119 | 119 | 142 | 144 | 112 | 112 |
| LA | 111 | 111 | 128 | 136 | 202 | 230 | 104 | 107 | 160 | 167 | 123 | 130 | 108 | 140 | 112 | 135 |
| LA | 111 | 111 | 103 | 107 | 206 | 217 | 100 | 109 | 167 | 167 | 123 | 130 | 140 | 140 | 112 | 112 |
| LA | 111 | 119 | 103 | 103 | 221 | 324 | 92  | 98  | 165 | 167 | 121 | 127 | 142 | 168 | 110 | 114 |
| LA | 111 | 111 | 105 | 105 | 206 | 300 | 94  | 96  | 165 | 165 | 121 | 125 | 108 | 166 | 89  | 112 |
| LA | 115 | 115 | 115 | 115 | 306 | 336 | 104 | 160 | 167 | 167 | 119 | 123 | 140 | 165 | 112 | 278 |
| LA | 111 | 111 | 103 | 122 | 315 | 375 | 94  | 104 | 160 | 167 | 119 | 123 | 136 | 144 | 112 | 112 |
| LA | 111 | 111 | 103 | 107 | 202 | 207 | 100 | 111 | 157 | 160 | 115 | 123 | 110 | 151 | 112 | 112 |
| LA | 111 | 111 | 111 | 111 | 251 | 311 | 106 | 212 | 165 | 167 | 115 | 117 | 108 | 140 | 110 | 112 |
| LA | 111 | 111 | 115 | 115 | 192 | 360 | 102 | 104 | 160 | 165 | 119 | 132 | 132 | 138 | 106 | 106 |
| LA | 111 | 111 | 126 | 144 | 208 | 215 | 100 | 107 | 169 | 169 | 119 | 127 | 107 | 142 | 112 | 112 |
| LA | 111 | 115 | 140 | 153 | 351 | 351 | 100 | 109 | 167 | 167 | 115 | 121 | 138 | 163 | 112 | 112 |
| LA | 111 | 115 | 172 | 172 | 251 | 311 | 98  | 104 | 165 | 171 | 123 | 130 | 136 | 138 | 112 | 112 |
| LA | 111 | 115 | 102 | 103 | 206 | 362 | 102 | 106 | 157 | 165 | 125 | 132 | 142 | 185 | 112 | 112 |
| LA | 111 | 115 | 113 | 113 | 190 | 328 | 94  | 102 | 165 | 167 | 121 | 138 | 108 | 108 | 112 | 112 |
| LA | 111 | 115 | 103 | 103 | 221 | 221 | 92  | 102 | 169 | 171 | 117 | 127 | 110 | 146 | 89  | 110 |
| TG | 115 | 115 | 0   | 0   | 206 | 225 | 94  | 98  | 165 | 167 | 115 | 138 | 111 | 124 | 0   | 0   |
| TG | 111 | 111 | 100 | 100 | 206 | 215 | 102 | 106 | 165 | 167 | 119 | 125 | 151 | 153 | 112 | 112 |
| TG | 111 | 111 | 103 | 117 | 211 | 211 | 98  | 104 | 157 | 165 | 115 | 117 | 134 | 140 | 112 | 112 |
| TG | 111 | 115 | 0   | 0   | 302 | 334 | 102 | 109 | 157 | 157 | 115 | 119 | 108 | 108 | 112 | 112 |
| TG | 111 | 115 | 109 | 109 | 318 | 336 | 102 | 102 | 157 | 167 | 127 | 136 | 108 | 108 | 112 | 112 |
| TG | 111 | 119 | 103 | 103 | 204 | 315 | 98  | 102 | 167 | 167 | 113 | 123 | 110 | 142 | 112 | 112 |
| TG | 111 | 126 | 103 | 103 | 329 | 329 | 102 | 106 | 157 | 167 | 123 | 127 | 151 | 163 | 112 | 112 |
| TG | 115 | 115 | 103 | 103 | 0   | 0   | 98  | 104 | 165 | 167 | 145 | 154 | 108 | 108 | 112 | 112 |
| TG | 111 | 126 | 103 | 103 | 230 | 366 | 106 | 109 | 162 | 165 | 123 | 132 | 138 | 151 | 110 | 112 |
| TG | 115 | 115 | 103 | 105 | 213 | 226 | 92  | 106 | 167 | 167 | 119 | 125 | 108 | 108 | 112 | 112 |
| TG | 111 | 111 | 0   | 0   | 200 | 353 | 98  | 100 | 165 | 165 | 134 | 136 | 149 | 180 | 112 | 112 |
| TG | 111 | 115 | 107 | 107 | 299 | 317 | 104 | 109 | 167 | 167 | 121 | 125 | 110 | 138 | 112 | 112 |
| TG | 111 | 115 | 103 | 103 | 202 | 303 | 98  | 98  | 157 | 167 | 115 | 119 | 108 | 161 | 112 | 114 |
| TG | 115 | 119 | 103 | 157 | 321 | 340 | 98  | 106 | 165 | 167 | 119 | 125 | 108 | 142 | 112 | 112 |
| TG | 111 | 111 | 103 | 109 | 334 | 345 | 98  | 104 | 169 | 169 | 119 | 125 | 112 | 140 | 112 | 112 |
| TG | 115 | 115 | 98  | 103 | 206 | 321 | 96  | 109 | 167 | 173 | 115 | 125 | 111 | 142 | 112 | 112 |
| TG | 111 | 115 | 0   | 0   | 309 | 326 | 102 | 106 | 165 | 167 | 115 | 132 | 142 | 163 | 112 | 112 |
| TG | 115 | 115 | 103 | 148 | 202 | 345 | 107 | 201 | 167 | 167 | 121 | 123 | 108 | 136 | 112 | 112 |
| TG | 111 | 119 | 157 | 157 | 207 | 340 | 106 | 109 | 165 | 165 | 127 | 132 | 142 | 149 | 112 | 112 |

|    |     |     |     |     |     |     |     |     |     |     |     |     |     |     |     |     |
|----|-----|-----|-----|-----|-----|-----|-----|-----|-----|-----|-----|-----|-----|-----|-----|-----|
| TG | 111 | 115 | 103 | 113 | 211 | 211 | 104 | 104 | 157 | 157 | 115 | 119 | 163 | 199 | 112 | 112 |
| TG | 115 | 119 | 0   | 0   | 202 | 221 | 102 | 115 | 165 | 167 | 115 | 123 | 110 | 163 | 110 | 112 |
| TG | 111 | 115 | 0   | 0   | 309 | 347 | 94  | 98  | 171 | 171 | 121 | 123 | 133 | 157 | 112 | 112 |
| TG | 107 | 111 | 105 | 105 | 200 | 221 | 98  | 102 | 167 | 171 | 119 | 130 | 108 | 127 | 112 | 112 |
| TG | 115 | 119 | 117 | 117 | 206 | 324 | 98  | 102 | 165 | 167 | 117 | 127 | 108 | 142 | 106 | 112 |
| TG | 111 | 115 | 105 | 113 | 213 | 311 | 94  | 104 | 157 | 167 | 119 | 134 | 101 | 108 | 112 | 112 |
| TG | 115 | 119 | 102 | 103 | 202 | 204 | 102 | 102 | 165 | 167 | 125 | 125 | 108 | 140 | 112 | 135 |
| TG | 111 | 111 | 103 | 113 | 206 | 386 | 98  | 104 | 167 | 169 | 115 | 119 | 142 | 163 | 112 | 112 |
| TG | 111 | 119 | 103 | 103 | 209 | 349 | 100 | 106 | 169 | 169 | 119 | 136 | 151 | 151 | 114 | 114 |
| TG | 111 | 119 | 98  | 98  | 221 | 237 | 100 | 102 | 165 | 167 | 115 | 121 | 108 | 174 | 114 | 114 |
| TG | 111 | 111 | 0   | 0   | 317 | 375 | 94  | 100 | 163 | 165 | 115 | 138 | 144 | 144 | 112 | 112 |
| TG | 115 | 115 | 103 | 113 | 207 | 254 | 100 | 107 | 165 | 173 | 115 | 116 | 142 | 182 | 112 | 112 |
| TG | 115 | 115 | 128 | 163 | 283 | 303 | 102 | 109 | 167 | 167 | 115 | 123 | 140 | 140 | 0   | 0   |
| TG | 111 | 111 | 103 | 103 | 231 | 334 | 102 | 128 | 169 | 171 | 119 | 121 | 138 | 142 | 0   | 0   |
| LP | 111 | 115 | 103 | 103 | 202 | 347 | 106 | 164 | 167 | 169 | 115 | 152 | 157 | 157 | 112 | 112 |
| LP | 111 | 115 | 103 | 103 | 190 | 347 | 102 | 104 | 165 | 167 | 119 | 138 | 108 | 108 | 112 | 112 |
| AT | 115 | 119 | 103 | 132 | 309 | 330 | 94  | 102 | 167 | 171 | 115 | 125 | 108 | 157 | 112 | 112 |
| AT | 115 | 119 | 103 | 103 | 223 | 308 | 100 | 102 | 167 | 169 | 127 | 130 | 108 | 140 | 112 | 112 |
| AT | 111 | 115 | 0   | 0   | 0   | 0   | 94  | 109 | 158 | 158 | 119 | 134 | 144 | 155 | 112 | 112 |
| AT | 111 | 115 | 103 | 103 | 206 | 207 | 107 | 111 | 157 | 165 | 119 | 130 | 108 | 149 | 112 | 112 |
| AT | 111 | 111 | 105 | 118 | 206 | 217 | 102 | 106 | 167 | 167 | 113 | 121 | 108 | 136 | 110 | 112 |
| AT | 111 | 111 | 103 | 103 | 231 | 360 | 104 | 106 | 165 | 171 | 125 | 132 | 107 | 142 | 110 | 112 |
| AT | 111 | 111 | 103 | 103 | 204 | 342 | 98  | 104 | 167 | 171 | 115 | 119 | 108 | 149 | 112 | 112 |
| AT | 120 | 126 | 0   | 0   | 338 | 380 | 100 | 104 | 167 | 171 | 119 | 152 | 146 | 153 | 110 | 112 |
| AT | 111 | 111 | 346 | 346 | 207 | 356 | 94  | 104 | 155 | 171 | 116 | 125 | 138 | 140 | 112 | 112 |
| AT | 123 | 134 | 0   | 0   | 309 | 332 | 98  | 100 | 167 | 171 | 115 | 123 | 134 | 140 | 112 | 112 |
| AT | 111 | 111 | 103 | 157 | 225 | 353 | 102 | 104 | 163 | 171 | 115 | 125 | 146 | 149 | 112 | 114 |
| AT | 111 | 119 | 103 | 103 | 226 | 345 | 104 | 203 | 169 | 169 | 109 | 119 | 138 | 144 | 112 | 112 |
| AT | 111 | 119 | 103 | 103 | 355 | 355 | 98  | 106 | 165 | 167 | 115 | 115 | 108 | 138 | 112 | 114 |
| AT | 115 | 126 | 113 | 113 | 340 | 397 | 102 | 102 | 160 | 165 | 125 | 127 | 138 | 138 | 112 | 112 |
| AT | 111 | 119 | 103 | 148 | 313 | 334 | 102 | 102 | 167 | 171 | 115 | 132 | 140 | 144 | 112 | 135 |
| AT | 115 | 126 | 0   | 0   | 202 | 328 | 98  | 102 | 165 | 165 | 123 | 148 | 140 | 159 | 112 | 203 |
| AT | 111 | 119 | 105 | 126 | 200 | 206 | 102 | 104 | 163 | 167 | 123 | 130 | 108 | 108 | 112 | 112 |
| AT | 119 | 119 | 103 | 103 | 246 | 246 | 106 | 109 | 167 | 171 | 121 | 130 | 129 | 184 | 112 | 290 |
| AT | 111 | 119 | 103 | 103 | 221 | 379 | 102 | 106 | 165 | 165 | 113 | 121 | 108 | 138 | 112 | 278 |
| AT | 107 | 115 | 103 | 113 | 321 | 321 | 102 | 102 | 158 | 165 | 148 | 148 | 108 | 140 | 112 | 230 |
| AT | 111 | 111 | 105 | 105 | 192 | 204 | 102 | 102 | 167 | 169 | 115 | 121 | 140 | 151 | 112 | 112 |
| AT | 111 | 119 | 0   | 0   | 202 | 209 | 92  | 98  | 167 | 171 | 119 | 125 | 136 | 142 | 112 | 112 |
| AT | 111 | 111 | 105 | 109 | 219 | 287 | 100 | 104 | 165 | 167 | 117 | 127 | 108 | 168 | 112 | 112 |
| AT | 115 | 119 | 161 | 161 | 206 | 228 | 102 | 106 | 165 | 171 | 134 | 134 | 108 | 110 | 112 | 112 |
| AT | 111 | 119 | 0   | 0   | 206 | 304 | 98  | 98  | 185 | 185 | 115 | 123 | 149 | 149 | 112 | 114 |
| AT | 111 | 115 | 98  | 124 | 328 | 353 | 102 | 104 | 157 | 167 | 119 | 127 | 108 | 180 | 112 | 116 |
| PM | 111 | 111 | 103 | 103 | 347 | 356 | 98  | 102 | 157 | 167 | 130 | 132 | 155 | 166 | 112 | 112 |
| PM | 111 | 115 | 100 | 103 | 207 | 321 | 102 | 104 | 165 | 165 | 115 | 119 | 138 | 201 | 112 | 129 |

|    |     |     |     |     |     |     |     |     |     |     |     |     |     |     |     |     |
|----|-----|-----|-----|-----|-----|-----|-----|-----|-----|-----|-----|-----|-----|-----|-----|-----|
| PM | 111 | 130 | 103 | 115 | 215 | 296 | 107 | 109 | 159 | 171 | 119 | 132 | 140 | 151 | 112 | 112 |
| PM | 115 | 115 | 130 | 130 | 313 | 371 | 109 | 172 | 167 | 173 | 109 | 134 | 108 | 176 | 112 | 206 |
| PM | 115 | 115 | 109 | 109 | 192 | 360 | 98  | 102 | 167 | 168 | 125 | 130 | 108 | 174 | 112 | 112 |
| PM | 115 | 119 | 103 | 103 | 366 | 375 | 98  | 102 | 158 | 165 | 119 | 148 | 142 | 146 | 112 | 112 |
| PM | 111 | 111 | 0   | 0   | 0   | 0   | 92  | 102 | 165 | 169 | 115 | 119 | 108 | 142 | 112 | 112 |
| PM | 111 | 126 | 103 | 103 | 304 | 321 | 94  | 100 | 165 | 167 | 121 | 145 | 144 | 146 | 89  | 112 |
| PM | 111 | 115 | 103 | 103 | 355 | 364 | 100 | 104 | 165 | 165 | 115 | 127 | 108 | 110 | 112 | 112 |
| PM | 111 | 134 | 102 | 105 | 344 | 368 | 98  | 100 | 169 | 169 | 123 | 125 | 142 | 146 | 89  | 112 |
| PM | 115 | 119 | 103 | 103 | 334 | 356 | 109 | 117 | 165 | 165 | 115 | 123 | 108 | 108 | 112 | 112 |
| PM | 111 | 111 | 107 | 138 | 252 | 324 | 100 | 106 | 158 | 171 | 119 | 119 | 108 | 126 | 112 | 112 |
| PM | 111 | 115 | 103 | 107 | 206 | 221 | 102 | 104 | 165 | 165 | 119 | 119 | 138 | 146 | 112 | 112 |
| PM | 111 | 123 | 130 | 130 | 308 | 326 | 98  | 102 | 171 | 171 | 115 | 145 | 108 | 153 | 112 | 245 |
| PM | 111 | 111 | 0   | 0   | 198 | 228 | 102 | 102 | 167 | 171 | 115 | 130 | 110 | 138 | 112 | 112 |
| PM | 115 | 115 | 102 | 161 | 215 | 352 | 104 | 107 | 168 | 168 | 115 | 119 | 108 | 140 | 112 | 112 |
| PM | 111 | 115 | 98  | 98  | 326 | 326 | 92  | 104 | 165 | 165 | 121 | 130 | 138 | 144 | 110 | 110 |
| PM | 115 | 119 | 155 | 164 | 347 | 347 | 102 | 102 | 165 | 167 | 115 | 143 | 108 | 165 | 0   | 0   |
| PM | 117 | 126 | 0   | 0   | 221 | 319 | 102 | 102 | 167 | 167 | 132 | 140 | 136 | 142 | 112 | 114 |
| PM | 111 | 111 | 103 | 103 | 204 | 336 | 98  | 102 | 165 | 165 | 121 | 150 | 108 | 144 | 112 | 112 |
| PM | 111 | 115 | 0   | 0   | 287 | 287 | 94  | 100 | 165 | 165 | 119 | 121 | 140 | 144 | 112 | 112 |
| PM | 111 | 119 | 103 | 113 | 202 | 353 | 104 | 109 | 165 | 175 | 134 | 134 | 108 | 191 | 112 | 264 |
| TV | 111 | 115 | 0   | 0   | 332 | 342 | 102 | 109 | 165 | 165 | 115 | 119 | 140 | 142 | 112 | 112 |
| TV | 111 | 126 | 103 | 105 | 206 | 246 | 100 | 102 | 167 | 167 | 119 | 140 | 144 | 146 | 112 | 249 |
| TV | 111 | 119 | 103 | 138 | 209 | 209 | 100 | 208 | 165 | 171 | 123 | 127 | 108 | 110 | 112 | 112 |
| TV | 111 | 115 | 103 | 109 | 313 | 375 | 100 | 104 | 171 | 173 | 115 | 134 | 108 | 142 | 112 | 112 |
| TV | 111 | 111 | 0   | 0   | 310 | 355 | 100 | 107 | 165 | 165 | 115 | 121 | 144 | 153 | 112 | 112 |
| TV | 115 | 115 | 113 | 128 | 213 | 353 | 0   | 0   | 159 | 159 | 138 | 138 | 138 | 161 | 112 | 112 |
| TV | 111 | 115 | 105 | 105 | 209 | 213 | 104 | 106 | 165 | 171 | 123 | 127 | 108 | 142 | 89  | 112 |
| TV | 111 | 111 | 115 | 115 | 202 | 215 | 102 | 104 | 167 | 167 | 115 | 125 | 138 | 155 | 112 | 114 |
| TV | 111 | 115 | 0   | 0   | 219 | 219 | 102 | 107 | 167 | 171 | 115 | 123 | 108 | 166 | 112 | 112 |
| TV | 115 | 115 | 103 | 103 | 202 | 321 | 98  | 104 | 165 | 165 | 115 | 125 | 138 | 140 | 112 | 112 |
| TV | 111 | 115 | 105 | 107 | 287 | 307 | 102 | 104 | 157 | 167 | 127 | 145 | 108 | 140 | 106 | 112 |
| TV | 111 | 119 | 98  | 98  | 196 | 360 | 94  | 100 | 165 | 165 | 115 | 123 | 170 | 170 | 112 | 112 |
| TV | 111 | 115 | 103 | 105 | 202 | 303 | 104 | 104 | 167 | 169 | 115 | 123 | 108 | 138 | 112 | 112 |
| TV | 111 | 111 | 96  | 111 | 202 | 333 | 102 | 104 | 157 | 165 | 117 | 134 | 108 | 161 | 112 | 112 |
| TV | 111 | 115 | 113 | 113 | 236 | 351 | 102 | 104 | 167 | 171 | 127 | 130 | 142 | 142 | 112 | 112 |
| TV | 111 | 115 | 103 | 115 | 347 | 349 | 104 | 107 | 167 | 169 | 115 | 123 | 138 | 140 | 112 | 112 |
| TV | 111 | 115 | 103 | 103 | 225 | 345 | 104 | 109 | 165 | 167 | 123 | 130 | 138 | 144 | 112 | 112 |
| TV | 115 | 126 | 269 | 269 | 202 | 328 | 100 | 102 | 158 | 175 | 115 | 117 | 134 | 138 | 110 | 112 |
| TV | 115 | 119 | 113 | 113 | 202 | 236 | 98  | 102 | 171 | 172 | 125 | 130 | 140 | 142 | 112 | 112 |
| TV | 111 | 119 | 96  | 111 | 313 | 319 | 98  | 100 | 165 | 171 | 113 | 123 | 138 | 138 | 112 | 112 |
| TV | 111 | 115 | 113 | 113 | 309 | 353 | 98  | 111 | 162 | 165 | 117 | 143 | 163 | 163 | 112 | 112 |
| TV | 111 | 119 | 103 | 103 | 200 | 375 | 100 | 106 | 167 | 175 | 121 | 130 | 138 | 180 | 112 | 112 |
| TV | 119 | 119 | 124 | 124 | 326 | 353 | 100 | 102 | 165 | 167 | 116 | 125 | 138 | 138 | 112 | 112 |
| TV | 111 | 115 | 0   | 0   | 207 | 375 | 102 | 102 | 173 | 173 | 119 | 119 | 108 | 144 | 114 | 114 |

|    |     |     |     |     |     |     |     |     |     |     |     |     |     |     |     |     |
|----|-----|-----|-----|-----|-----|-----|-----|-----|-----|-----|-----|-----|-----|-----|-----|-----|
| TV | 115 | 115 | 103 | 113 | 215 | 364 | 100 | 102 | 165 | 165 | 113 | 134 | 108 | 144 | 112 | 112 |
| TV | 111 | 119 | 103 | 103 | 209 | 321 | 100 | 106 | 171 | 171 | 121 | 127 | 142 | 157 | 112 | 112 |
| TV | 111 | 115 | 102 | 102 | 213 | 340 | 98  | 102 | 165 | 167 | 125 | 130 | 138 | 140 | 110 | 112 |
| VL | 111 | 115 | 103 | 103 | 219 | 317 | 102 | 104 | 177 | 177 | 134 | 136 | 138 | 146 | 112 | 112 |
| VL | 111 | 115 | 107 | 107 | 204 | 353 | 102 | 104 | 167 | 167 | 125 | 140 | 108 | 140 | 112 | 114 |
| VL | 111 | 115 | 103 | 117 | 340 | 340 | 98  | 102 | 165 | 173 | 121 | 121 | 140 | 146 | 112 | 112 |
| VL | 111 | 115 | 103 | 103 | 213 | 306 | 102 | 170 | 167 | 167 | 115 | 119 | 108 | 157 | 112 | 112 |
| VL | 111 | 119 | 102 | 102 | 207 | 332 | 100 | 102 | 165 | 171 | 127 | 132 | 134 | 142 | 89  | 112 |
| VL | 111 | 115 | 103 | 147 | 224 | 224 | 102 | 111 | 169 | 171 | 125 | 143 | 136 | 142 | 112 | 112 |
| VL | 111 | 111 | 128 | 128 | 225 | 321 | 102 | 107 | 169 | 169 | 123 | 132 | 108 | 138 | 112 | 114 |
| VL | 115 | 119 | 103 | 155 | 329 | 386 | 100 | 102 | 160 | 167 | 123 | 127 | 108 | 140 | 112 | 112 |
| VL | 111 | 115 | 109 | 109 | 221 | 360 | 106 | 107 | 167 | 171 | 125 | 134 | 142 | 153 | 112 | 112 |
| VL | 111 | 111 | 103 | 111 | 202 | 221 | 98  | 100 | 157 | 167 | 117 | 132 | 108 | 161 | 112 | 112 |
| VL | 115 | 119 | 103 | 113 | 324 | 356 | 102 | 111 | 165 | 167 | 121 | 130 | 140 | 163 | 112 | 112 |
| VL | 115 | 115 | 103 | 103 | 204 | 347 | 90  | 98  | 167 | 167 | 111 | 119 | 108 | 149 | 112 | 261 |
| VL | 111 | 126 | 105 | 122 | 200 | 219 | 100 | 100 | 165 | 167 | 109 | 130 | 107 | 142 | 89  | 112 |
| VL | 111 | 111 | 0   | 0   | 342 | 364 | 100 | 117 | 157 | 167 | 115 | 132 | 108 | 174 | 112 | 253 |
| VL | 111 | 115 | 105 | 105 | 299 | 371 | 102 | 104 | 165 | 167 | 113 | 116 | 140 | 151 | 112 | 264 |
| VL | 115 | 115 | 103 | 103 | 317 | 356 | 92  | 102 | 165 | 165 | 115 | 119 | 138 | 138 | 112 | 112 |
| VL | 115 | 123 | 103 | 103 | 324 | 390 | 98  | 107 | 165 | 175 | 123 | 132 | 108 | 140 | 112 | 112 |
| VL | 111 | 115 | 105 | 105 | 355 | 355 | 98  | 111 | 167 | 167 | 116 | 116 | 108 | 140 | 112 | 129 |
| VL | 111 | 119 | 109 | 148 | 209 | 353 | 102 | 104 | 157 | 167 | 115 | 132 | 146 | 151 | 112 | 197 |
| VL | 111 | 119 | 107 | 111 | 207 | 207 | 94  | 102 | 165 | 171 | 117 | 123 | 112 | 112 | 112 | 290 |
| VL | 111 | 111 | 105 | 105 | 206 | 332 | 98  | 107 | 167 | 171 | 125 | 130 | 138 | 140 | 112 | 112 |
| VL | 111 | 111 | 96  | 111 | 231 | 353 | 104 | 109 | 165 | 167 | 115 | 123 | 110 | 110 | 112 | 112 |
| VL | 115 | 119 | 103 | 103 | 314 | 362 | 106 | 233 | 165 | 165 | 123 | 130 | 138 | 142 | 112 | 112 |
| VL | 111 | 115 | 103 | 164 | 207 | 207 | 102 | 104 | 165 | 165 | 121 | 125 | 138 | 142 | 106 | 112 |
| VL | 107 | 126 | 103 | 113 | 206 | 334 | 98  | 100 | 165 | 165 | 115 | 136 | 110 | 138 | 112 | 112 |
| VL | 111 | 120 | 113 | 128 | 209 | 351 | 98  | 106 | 166 | 167 | 123 | 130 | 108 | 136 | 112 | 114 |
| VL | 115 | 126 | 134 | 134 | 196 | 206 | 102 | 102 | 165 | 167 | 113 | 125 | 110 | 153 | 106 | 112 |
| SG | 111 | 111 | 107 | 107 | 196 | 379 | 98  | 104 | 167 | 171 | 121 | 125 | 138 | 155 | 112 | 271 |
| SG | 107 | 111 | 103 | 103 | 202 | 211 | 104 | 106 | 167 | 167 | 115 | 115 | 108 | 182 | 112 | 112 |
| SG | 111 | 111 | 103 | 103 | 202 | 336 | 104 | 104 | 158 | 158 | 119 | 140 | 110 | 140 | 112 | 112 |
| SG | 111 | 111 | 103 | 178 | 311 | 364 | 98  | 102 | 165 | 167 | 119 | 130 | 140 | 165 | 112 | 112 |
| LR | 115 | 119 | 103 | 103 | 296 | 321 | 98  | 98  | 158 | 158 | 119 | 138 | 108 | 146 | 106 | 112 |
| LR | 111 | 111 | 105 | 105 | 317 | 355 | 100 | 172 | 165 | 165 | 130 | 150 | 108 | 180 | 112 | 112 |
| LR | 111 | 115 | 103 | 103 | 321 | 356 | 100 | 111 | 167 | 167 | 119 | 127 | 108 | 191 | 106 | 112 |
| LR | 115 | 119 | 103 | 103 | 217 | 217 | 107 | 109 | 167 | 169 | 119 | 125 | 138 | 166 | 112 | 112 |
| LR | 111 | 111 | 103 | 115 | 207 | 299 | 98  | 102 | 165 | 171 | 117 | 123 | 108 | 159 | 112 | 112 |
| LR | 111 | 126 | 103 | 103 | 344 | 370 | 102 | 104 | 167 | 171 | 115 | 115 | 108 | 161 | 89  | 89  |
| LR | 111 | 115 | 103 | 140 | 311 | 321 | 96  | 106 | 165 | 169 | 113 | 130 | 151 | 182 | 110 | 112 |
| LR | 111 | 115 | 103 | 103 | 223 | 364 | 102 | 102 | 173 | 173 | 117 | 121 | 142 | 144 | 112 | 112 |
| LR | 111 | 134 | 0   | 0   | 308 | 308 | 94  | 104 | 165 | 167 | 115 | 132 | 138 | 212 | 112 | 112 |
| LR | 111 | 119 | 105 | 105 | 328 | 358 | 98  | 104 | 167 | 167 | 115 | 125 | 110 | 144 | 112 | 112 |

|    |     |     |     |     |     |     |     |     |     |     |     |     |     |     |     |     |
|----|-----|-----|-----|-----|-----|-----|-----|-----|-----|-----|-----|-----|-----|-----|-----|-----|
| LR | 111 | 111 | 103 | 103 | 204 | 206 | 94  | 148 | 165 | 165 | 119 | 132 | 108 | 138 | 112 | 114 |
| LR | 111 | 119 | 107 | 107 | 344 | 379 | 100 | 109 | 165 | 167 | 123 | 127 | 108 | 140 | 112 | 112 |
| LR | 119 | 126 | 105 | 107 | 273 | 340 | 102 | 109 | 173 | 177 | 119 | 132 | 108 | 138 | 106 | 112 |
| LR | 111 | 115 | 0   | 0   | 202 | 223 | 104 | 104 | 167 | 167 | 130 | 132 | 138 | 138 | 112 | 112 |
| LR | 111 | 111 | 103 | 128 | 200 | 202 | 107 | 201 | 157 | 167 | 117 | 140 | 108 | 138 | 112 | 112 |
| LR | 111 | 119 | 107 | 126 | 199 | 231 | 94  | 104 | 157 | 167 | 119 | 125 | 138 | 140 | 112 | 112 |
| LR | 111 | 119 | 103 | 120 | 209 | 313 | 100 | 102 | 163 | 171 | 123 | 125 | 140 | 187 | 110 | 112 |
| LR | 111 | 115 | 122 | 122 | 351 | 356 | 102 | 102 | 160 | 167 | 115 | 117 | 142 | 144 | 112 | 114 |
| LR | 111 | 119 | 103 | 105 | 206 | 306 | 94  | 104 | 157 | 159 | 116 | 125 | 134 | 138 | 112 | 112 |
| LR | 111 | 115 | 103 | 103 | 317 | 368 | 102 | 106 | 160 | 165 | 111 | 132 | 108 | 134 | 0   | 0   |
| LR | 111 | 111 | 0   | 0   | 206 | 233 | 100 | 100 | 167 | 167 | 127 | 156 | 110 | 140 | 112 | 112 |
| LR | 111 | 112 | 103 | 103 | 200 | 231 | 98  | 100 | 167 | 169 | 121 | 121 | 142 | 144 | 112 | 112 |
| LR | 111 | 111 | 103 | 103 | 317 | 319 | 102 | 107 | 165 | 165 | 115 | 119 | 108 | 138 | 112 | 112 |
| LR | 115 | 115 | 103 | 103 | 194 | 307 | 96  | 102 | 165 | 171 | 127 | 134 | 138 | 165 | 112 | 112 |
| LR | 107 | 115 | 138 | 138 | 246 | 317 | 106 | 106 | 163 | 163 | 115 | 119 | 108 | 142 | 112 | 112 |
| LR | 115 | 119 | 103 | 103 | 349 | 364 | 96  | 142 | 157 | 171 | 123 | 125 | 107 | 146 | 112 | 112 |
| LR | 111 | 119 | 132 | 132 | 0   | 0   | 94  | 102 | 157 | 157 | 109 | 119 | 103 | 140 | 112 | 112 |
| LR | 111 | 115 | 105 | 111 | 0   | 0   | 102 | 107 | 165 | 167 | 121 | 127 | 140 | 140 | 112 | 112 |
| LR | 119 | 123 | 159 | 159 | 221 | 356 | 104 | 106 | 157 | 167 | 115 | 115 | 108 | 140 | 89  | 112 |
| LR | 115 | 119 | 103 | 164 | 300 | 328 | 94  | 109 | 171 | 171 | 119 | 123 | 140 | 157 | 112 | 112 |
| RB | 111 | 111 | 0   | 0   | 291 | 291 | 104 | 107 | 157 | 162 | 119 | 127 | 138 | 153 | 112 | 112 |
| RB | 111 | 115 | 0   | 0   | 200 | 294 | 92  | 104 | 165 | 167 | 115 | 119 | 108 | 108 | 112 | 112 |
| RB | 111 | 111 | 103 | 103 | 0   | 0   | 102 | 168 | 158 | 171 | 117 | 127 | 108 | 108 | 112 | 112 |
| RB | 111 | 115 | 124 | 124 | 309 | 324 | 102 | 104 | 165 | 167 | 115 | 119 | 108 | 142 | 112 | 112 |
| RB | 111 | 115 | 103 | 140 | 215 | 217 | 96  | 102 | 165 | 165 | 115 | 123 | 140 | 149 | 110 | 112 |
| RB | 111 | 111 | 103 | 157 | 318 | 364 | 100 | 113 | 158 | 167 | 115 | 121 | 108 | 138 | 0   | 0   |
| RB | 111 | 111 | 103 | 103 | 358 | 358 | 98  | 104 | 165 | 167 | 123 | 125 | 138 | 140 | 89  | 89  |
| RB | 111 | 126 | 113 | 113 | 209 | 366 | 100 | 104 | 165 | 171 | 115 | 115 | 107 | 153 | 112 | 255 |
| RB | 111 | 112 | 105 | 105 | 310 | 375 | 100 | 102 | 165 | 165 | 119 | 121 | 140 | 149 | 112 | 112 |
| RB | 115 | 115 | 103 | 113 | 283 | 336 | 96  | 98  | 165 | 165 | 115 | 115 | 108 | 144 | 89  | 112 |
| RB | 115 | 130 | 103 | 103 | 364 | 380 | 94  | 100 | 167 | 169 | 115 | 134 | 149 | 153 | 110 | 112 |
| RB | 111 | 115 | 103 | 122 | 202 | 383 | 102 | 102 | 167 | 171 | 119 | 127 | 138 | 140 | 112 | 112 |
| RB | 115 | 119 | 130 | 130 | 209 | 209 | 102 | 106 | 165 | 169 | 119 | 127 | 110 | 136 | 112 | 240 |
| RB | 111 | 119 | 105 | 159 | 375 | 406 | 94  | 104 | 167 | 167 | 125 | 127 | 108 | 138 | 112 | 269 |
| RB | 111 | 119 | 103 | 177 | 204 | 226 | 98  | 100 | 167 | 171 | 132 | 145 | 149 | 161 | 112 | 112 |
| RB | 111 | 111 | 184 | 184 | 202 | 240 | 100 | 106 | 165 | 167 | 115 | 125 | 108 | 108 | 95  | 280 |
| RB | 111 | 119 | 172 | 172 | 219 | 219 | 102 | 104 | 167 | 170 | 123 | 123 | 108 | 140 | 112 | 112 |
| RB | 111 | 115 | 103 | 103 | 209 | 225 | 102 | 107 | 165 | 165 | 121 | 123 | 142 | 157 | 112 | 224 |
| RB | 112 | 134 | 103 | 103 | 215 | 379 | 102 | 102 | 169 | 173 | 117 | 123 | 157 | 176 | 89  | 112 |
| RB | 111 | 111 | 107 | 178 | 340 | 356 | 102 | 106 | 165 | 167 | 119 | 119 | 151 | 165 | 112 | 112 |
| RB | 111 | 119 | 103 | 197 | 219 | 340 | 94  | 102 | 165 | 167 | 123 | 125 | 108 | 140 | 112 | 112 |
| RB | 111 | 111 | 103 | 103 | 202 | 336 | 102 | 109 | 169 | 173 | 125 | 145 | 151 | 159 | 112 | 112 |
| RB | 119 | 119 | 105 | 105 | 217 | 345 | 94  | 115 | 165 | 165 | 115 | 119 | 108 | 110 | 110 | 112 |
| RB | 115 | 119 | 0   | 0   | 304 | 355 | 102 | 104 | 167 | 167 | 119 | 127 | 140 | 151 | 114 | 114 |

|    |     |     |     |     |     |     |     |     |     |     |     |     |     |     |     |     |
|----|-----|-----|-----|-----|-----|-----|-----|-----|-----|-----|-----|-----|-----|-----|-----|-----|
| RB | 111 | 119 | 103 | 103 | 196 | 215 | 102 | 106 | 167 | 167 | 115 | 130 | 108 | 142 | 112 | 296 |
| RB | 111 | 111 | 103 | 113 | 206 | 377 | 100 | 104 | 171 | 171 | 134 | 140 | 108 | 138 | 112 | 114 |
| RB | 111 | 115 | 107 | 107 | 206 | 375 | 100 | 109 | 157 | 167 | 123 | 123 | 140 | 165 | 112 | 112 |
| RB | 111 | 115 | 105 | 201 | 213 | 287 | 96  | 106 | 165 | 166 | 119 | 125 | 108 | 166 | 112 | 112 |
| RB | 111 | 115 | 105 | 105 | 291 | 334 | 102 | 102 | 171 | 175 | 115 | 127 | 140 | 140 | 112 | 112 |
| RB | 111 | 130 | 103 | 103 | 211 | 360 | 102 | 102 | 165 | 167 | 119 | 130 | 108 | 138 | 112 | 112 |
| RB | 111 | 119 | 134 | 134 | 226 | 377 | 92  | 106 | 165 | 167 | 117 | 125 | 140 | 159 | 110 | 112 |
| RB | 112 | 115 | 103 | 103 | 379 | 379 | 98  | 104 | 167 | 167 | 123 | 138 | 108 | 155 | 89  | 112 |
| CB | 111 | 119 | 103 | 103 | 202 | 324 | 94  | 104 | 165 | 165 | 117 | 125 | 108 | 108 | 112 | 112 |
| CB | 111 | 111 | 103 | 118 | 225 | 241 | 170 | 170 | 158 | 167 | 127 | 136 | 138 | 142 | 112 | 112 |
| CB | 111 | 126 | 132 | 132 | 209 | 225 | 100 | 102 | 165 | 167 | 116 | 119 | 107 | 173 | 110 | 112 |
| CB | 115 | 115 | 0   | 0   | 215 | 342 | 100 | 102 | 167 | 167 | 127 | 136 | 110 | 172 | 112 | 112 |
| CB | 115 | 115 | 103 | 103 | 204 | 308 | 102 | 102 | 167 | 167 | 123 | 130 | 166 | 166 | 112 | 294 |
| CB | 111 | 115 | 103 | 103 | 234 | 334 | 92  | 104 | 167 | 171 | 119 | 123 | 108 | 142 | 112 | 112 |
| CB | 115 | 115 | 124 | 124 | 200 | 202 | 100 | 102 | 173 | 173 | 115 | 125 | 108 | 138 | 112 | 112 |
| CB | 115 | 119 | 92  | 92  | 379 | 379 | 98  | 109 | 157 | 167 | 125 | 125 | 108 | 142 | 110 | 112 |
| CB | 111 | 126 | 103 | 103 | 368 | 368 | 100 | 107 | 160 | 165 | 113 | 117 | 108 | 140 | 112 | 112 |
| CB | 111 | 111 | 250 | 250 | 322 | 330 | 104 | 106 | 167 | 173 | 115 | 115 | 142 | 195 | 0   | 0   |
| CB | 111 | 119 | 120 | 120 | 207 | 340 | 106 | 106 | 167 | 167 | 125 | 125 | 108 | 112 | 112 | 114 |
| CB | 111 | 115 | 172 | 172 | 326 | 353 | 102 | 102 | 167 | 172 | 115 | 121 | 108 | 138 | 112 | 112 |
| CB | 115 | 115 | 103 | 182 | 332 | 351 | 102 | 214 | 165 | 165 | 115 | 125 | 140 | 153 | 89  | 112 |
| CB | 111 | 111 | 0   | 0   | 204 | 342 | 102 | 102 | 167 | 169 | 115 | 115 | 108 | 146 | 89  | 89  |
| CB | 111 | 126 | 0   | 0   | 317 | 386 | 98  | 98  | 167 | 169 | 125 | 132 | 108 | 140 | 112 | 292 |
| CB | 111 | 111 | 0   | 0   | 304 | 304 | 104 | 104 | 159 | 171 | 127 | 127 | 108 | 168 | 112 | 112 |
| CB | 111 | 126 | 103 | 105 | 200 | 337 | 100 | 102 | 167 | 167 | 119 | 123 | 108 | 140 | 112 | 112 |
| CB | 111 | 111 | 103 | 103 | 216 | 221 | 100 | 106 | 167 | 167 | 109 | 127 | 142 | 186 | 112 | 112 |
| CB | 111 | 126 | 128 | 128 | 0   | 0   | 96  | 111 | 165 | 171 | 119 | 119 | 151 | 165 | 106 | 303 |
| CB | 111 | 119 | 103 | 103 | 207 | 353 | 102 | 199 | 167 | 171 | 123 | 125 | 153 | 155 | 112 | 112 |
| CB | 111 | 134 | 178 | 178 | 204 | 340 | 100 | 104 | 170 | 170 | 121 | 127 | 138 | 165 | 112 | 229 |
| CB | 107 | 111 | 103 | 103 | 204 | 336 | 98  | 157 | 158 | 158 | 115 | 123 | 108 | 153 | 112 | 112 |
| CB | 111 | 119 | 128 | 138 | 206 | 221 | 104 | 113 | 165 | 167 | 115 | 119 | 142 | 197 | 110 | 110 |
| CB | 111 | 115 | 103 | 103 | 209 | 386 | 102 | 109 | 165 | 175 | 119 | 127 | 110 | 110 | 112 | 114 |
| CB | 111 | 119 | 0   | 0   | 294 | 347 | 98  | 102 | 165 | 167 | 113 | 130 | 140 | 146 | 112 | 278 |
| CB | 115 | 126 | 103 | 134 | 353 | 353 | 98  | 106 | 158 | 171 | 123 | 123 | 111 | 136 | 89  | 112 |
| CB | 111 | 126 | 155 | 155 | 237 | 347 | 98  | 102 | 167 | 167 | 121 | 132 | 138 | 138 | 112 | 200 |
| CB | 111 | 119 | 105 | 105 | 317 | 345 | 107 | 109 | 160 | 171 | 115 | 123 | 140 | 155 | 0   | 0   |
| CB | 111 | 111 | 103 | 136 | 202 | 336 | 90  | 102 | 157 | 167 | 113 | 115 | 138 | 144 | 112 | 112 |
| SB | 111 | 115 | 103 | 103 | 211 | 232 | 96  | 102 | 158 | 167 | 115 | 125 | 110 | 140 | 112 | 112 |
| SB | 111 | 111 | 0   | 0   | 352 | 383 | 96  | 104 | 162 | 165 | 119 | 121 | 140 | 157 | 112 | 222 |
| SB | 111 | 111 | 136 | 136 | 236 | 356 | 102 | 170 | 163 | 167 | 119 | 130 | 138 | 217 | 110 | 112 |
| SB | 107 | 111 | 103 | 103 | 321 | 321 | 100 | 104 | 165 | 167 | 121 | 132 | 108 | 146 | 112 | 112 |
| SB | 111 | 111 | 103 | 103 | 353 | 366 | 98  | 106 | 157 | 165 | 119 | 119 | 136 | 182 | 110 | 112 |
| SB | 111 | 111 | 109 | 109 | 215 | 217 | 98  | 104 | 167 | 167 | 119 | 134 | 110 | 138 | 112 | 112 |
| SB | 111 | 115 | 105 | 134 | 340 | 340 | 98  | 106 | 165 | 177 | 115 | 123 | 108 | 140 | 112 | 112 |

|    |     |     |     |     |     |     |     |     |     |     |     |     |     |     |     |     |
|----|-----|-----|-----|-----|-----|-----|-----|-----|-----|-----|-----|-----|-----|-----|-----|-----|
| SB | 111 | 111 | 103 | 103 | 223 | 336 | 102 | 102 | 167 | 167 | 113 | 119 | 138 | 140 | 112 | 112 |
| SB | 111 | 111 | 103 | 103 | 356 | 383 | 104 | 107 | 165 | 165 | 117 | 127 | 140 | 180 | 112 | 112 |
| SB | 111 | 111 | 128 | 128 | 207 | 231 | 96  | 104 | 165 | 173 | 115 | 121 | 108 | 140 | 112 | 112 |
| SB | 111 | 115 | 111 | 132 | 207 | 401 | 98  | 107 | 171 | 171 | 115 | 127 | 107 | 142 | 112 | 112 |
| SB | 111 | 115 | 0   | 0   | 317 | 326 | 106 | 210 | 171 | 173 | 117 | 143 | 134 | 157 | 112 | 112 |
| SB | 111 | 115 | 134 | 134 | 206 | 206 | 98  | 100 | 160 | 160 | 123 | 125 | 108 | 155 | 112 | 112 |
| SB | 111 | 115 | 0   | 0   | 330 | 356 | 98  | 107 | 165 | 165 | 115 | 115 | 108 | 151 | 112 | 112 |
| SB | 115 | 115 | 103 | 126 | 192 | 217 | 102 | 109 | 165 | 167 | 115 | 117 | 144 | 146 | 112 | 112 |
| SB | 111 | 119 | 98  | 147 | 355 | 355 | 94  | 109 | 157 | 165 | 127 | 134 | 108 | 140 | 112 | 112 |
| SB | 111 | 111 | 103 | 103 | 206 | 219 | 100 | 104 | 165 | 167 | 125 | 125 | 136 | 155 | 112 | 112 |
| SB | 111 | 115 | 140 | 140 | 207 | 338 | 106 | 109 | 158 | 165 | 127 | 127 | 142 | 146 | 116 | 197 |
| SB | 115 | 115 | 113 | 126 | 330 | 330 | 104 | 206 | 167 | 167 | 119 | 132 | 108 | 144 | 112 | 303 |
| SB | 108 | 115 | 103 | 103 | 302 | 321 | 98  | 100 | 167 | 171 | 115 | 140 | 140 | 140 | 112 | 112 |
| SB | 111 | 126 | 208 | 208 | 221 | 303 | 98  | 100 | 165 | 165 | 117 | 119 | 140 | 163 | 95  | 95  |
| SB | 111 | 123 | 105 | 113 | 206 | 342 | 100 | 102 | 165 | 167 | 115 | 117 | 142 | 161 | 112 | 112 |
| SB | 111 | 111 | 103 | 103 | 206 | 207 | 100 | 102 | 165 | 167 | 119 | 119 | 140 | 151 | 112 | 114 |
| SB | 115 | 115 | 103 | 117 | 329 | 336 | 98  | 109 | 165 | 167 | 136 | 140 | 108 | 144 | 112 | 112 |
| SB | 119 | 119 | 0   | 0   | 200 | 334 | 102 | 104 | 157 | 169 | 119 | 119 | 136 | 140 | 112 | 112 |
| SB | 111 | 115 | 103 | 122 | 213 | 213 | 100 | 210 | 157 | 165 | 115 | 134 | 144 | 153 | 112 | 114 |
| SB | 111 | 111 | 0   | 0   | 206 | 206 | 102 | 170 | 165 | 169 | 115 | 136 | 108 | 108 | 112 | 112 |
| SB | 111 | 111 | 103 | 105 | 231 | 311 | 92  | 106 | 157 | 167 | 115 | 121 | 136 | 153 | 112 | 112 |
| SB | 111 | 115 | 103 | 103 | 313 | 368 | 107 | 182 | 167 | 167 | 115 | 116 | 142 | 174 | 112 | 112 |
| SB | 111 | 119 | 103 | 103 | 349 | 349 | 100 | 100 | 163 | 165 | 117 | 119 | 108 | 140 | 112 | 112 |
| SB | 115 | 119 | 103 | 103 | 246 | 410 | 92  | 92  | 158 | 167 | 119 | 132 | 138 | 140 | 112 | 112 |
| SB | 111 | 119 | 117 | 128 | 304 | 355 | 96  | 106 | 165 | 167 | 125 | 134 | 151 | 159 | 112 | 112 |
| SB | 111 | 115 | 0   | 0   | 202 | 225 | 98  | 102 | 165 | 165 | 115 | 130 | 108 | 149 | 112 | 137 |
| EB | 111 | 111 | 103 | 103 | 209 | 213 | 98  | 104 | 165 | 167 | 119 | 119 | 136 | 142 | 112 | 114 |
| EB | 111 | 111 | 103 | 103 | 0   | 0   | 102 | 106 | 167 | 169 | 119 | 132 | 110 | 142 | 106 | 112 |
| EB | 111 | 123 | 103 | 103 | 206 | 219 | 102 | 102 | 165 | 168 | 119 | 132 | 142 | 151 | 112 | 112 |
| EB | 111 | 120 | 113 | 130 | 0   | 0   | 102 | 106 | 165 | 167 | 119 | 130 | 136 | 144 | 112 | 112 |
| EB | 107 | 111 | 126 | 126 | 204 | 209 | 98  | 106 | 160 | 169 | 123 | 134 | 155 | 176 | 112 | 112 |
| EB | 111 | 115 | 103 | 103 | 310 | 390 | 100 | 102 | 171 | 171 | 115 | 123 | 111 | 142 | 112 | 112 |
| EB | 107 | 119 | 102 | 103 | 344 | 351 | 94  | 100 | 165 | 167 | 119 | 119 | 138 | 140 | 112 | 112 |
| EB | 111 | 119 | 0   | 0   | 207 | 309 | 98  | 100 | 169 | 171 | 115 | 125 | 108 | 140 | 112 | 135 |
| EB | 111 | 111 | 105 | 142 | 217 | 375 | 104 | 109 | 158 | 167 | 119 | 121 | 108 | 140 | 110 | 112 |
| EB | 111 | 126 | 103 | 105 | 206 | 379 | 98  | 104 | 167 | 169 | 115 | 127 | 108 | 142 | 110 | 112 |
| EB | 111 | 111 | 118 | 126 | 200 | 319 | 102 | 117 | 165 | 167 | 113 | 119 | 110 | 174 | 112 | 112 |
| EB | 111 | 111 | 103 | 103 | 386 | 386 | 94  | 313 | 157 | 165 | 125 | 132 | 108 | 182 | 112 | 112 |
| EB | 111 | 119 | 105 | 105 | 200 | 287 | 96  | 98  | 167 | 167 | 115 | 119 | 108 | 126 | 112 | 112 |
| EB | 111 | 119 | 120 | 128 | 336 | 336 | 98  | 102 | 165 | 165 | 123 | 132 | 108 | 140 | 112 | 259 |
| EB | 111 | 111 | 103 | 103 | 207 | 379 | 102 | 195 | 157 | 165 | 119 | 123 | 108 | 113 | 112 | 265 |
| EB | 115 | 115 | 100 | 100 | 295 | 368 | 98  | 142 | 157 | 157 | 119 | 119 | 140 | 140 | 112 | 112 |
| EB | 111 | 111 | 103 | 166 | 213 | 334 | 94  | 102 | 167 | 171 | 119 | 125 | 155 | 163 | 112 | 155 |
| EB | 111 | 115 | 0   | 0   | 206 | 330 | 102 | 104 | 157 | 169 | 115 | 134 | 138 | 184 | 112 | 112 |



|    |     |     |     |     |     |     |     |     |     |     |     |     |     |     |     |     |
|----|-----|-----|-----|-----|-----|-----|-----|-----|-----|-----|-----|-----|-----|-----|-----|-----|
| EB | 115 | 115 | 103 | 103 | 321 | 338 | 96  | 98  | 165 | 167 | 119 | 125 | 138 | 182 | 0   | 0   |
| EB | 115 | 126 | 113 | 126 | 336 | 338 | 102 | 106 | 165 | 165 | 119 | 125 | 108 | 138 | 112 | 112 |
| EB | 111 | 111 | 120 | 120 | 371 | 371 | 102 | 104 | 157 | 167 | 123 | 136 | 140 | 151 | 112 | 112 |
| EB | 111 | 115 | 0   | 0   | 235 | 375 | 98  | 102 | 165 | 167 | 115 | 136 | 108 | 140 | 112 | 112 |
| EB | 115 | 119 | 98  | 103 | 297 | 317 | 100 | 102 | 167 | 167 | 119 | 119 | 108 | 108 | 112 | 424 |
| EB | 111 | 119 | 0   | 0   | 204 | 213 | 102 | 106 | 165 | 169 | 115 | 130 | 108 | 108 | 110 | 112 |
| EB | 111 | 115 | 103 | 103 | 206 | 206 | 102 | 104 | 167 | 167 | 115 | 132 | 108 | 157 | 95  | 95  |
| EB | 115 | 115 | 103 | 128 | 226 | 342 | 98  | 107 | 167 | 171 | 132 | 134 | 108 | 144 | 112 | 114 |
| EB | 111 | 111 | 124 | 124 | 336 | 375 | 106 | 107 | 167 | 167 | 117 | 119 | 149 | 159 | 112 | 112 |
| EB | 111 | 115 | 103 | 103 | 192 | 375 | 98  | 102 | 169 | 169 | 117 | 136 | 161 | 163 | 112 | 112 |
| EB | 107 | 119 | 103 | 103 | 213 | 319 | 111 | 111 | 157 | 169 | 119 | 119 | 144 | 186 | 110 | 112 |
| EB | 111 | 111 | 122 | 122 | 206 | 307 | 104 | 104 | 167 | 173 | 125 | 127 | 140 | 140 | 89  | 112 |
| EB | 115 | 115 | 103 | 103 | 234 | 349 | 106 | 107 | 165 | 167 | 121 | 121 | 108 | 142 | 112 | 112 |
| EB | 115 | 123 | 235 | 235 | 314 | 349 | 100 | 109 | 158 | 165 | 117 | 132 | 110 | 113 | 112 | 112 |
| EB | 111 | 115 | 117 | 117 | 347 | 356 | 100 | 107 | 165 | 167 | 116 | 125 | 108 | 140 | 112 | 112 |
| EB | 115 | 115 | 103 | 103 | 219 | 219 | 106 | 109 | 165 | 165 | 115 | 125 | 108 | 153 | 112 | 112 |
| ES | 111 | 115 | 113 | 172 | 200 | 273 | 100 | 104 | 167 | 167 | 130 | 130 | 108 | 110 | 112 | 114 |
| ES | 111 | 115 | 103 | 103 | 202 | 329 | 98  | 98  | 165 | 167 | 116 | 130 | 108 | 191 | 112 | 112 |
| ES | 115 | 119 | 103 | 103 | 204 | 360 | 102 | 102 | 167 | 170 | 121 | 138 | 108 | 178 | 112 | 112 |
| ES | 111 | 115 | 100 | 105 | 373 | 388 | 98  | 98  | 165 | 173 | 115 | 127 | 110 | 149 | 112 | 112 |
| ES | 115 | 126 | 103 | 178 | 217 | 217 | 102 | 216 | 165 | 165 | 115 | 115 | 140 | 142 | 112 | 112 |
| ES | 111 | 111 | 103 | 103 | 202 | 326 | 104 | 107 | 165 | 165 | 119 | 125 | 108 | 159 | 112 | 112 |
| ES | 115 | 115 | 103 | 113 | 379 | 379 | 100 | 107 | 162 | 165 | 130 | 132 | 108 | 168 | 112 | 237 |
| ES | 119 | 126 | 105 | 115 | 330 | 356 | 104 | 189 | 165 | 167 | 115 | 123 | 108 | 140 | 112 | 131 |
| ES | 115 | 115 | 136 | 159 | 207 | 344 | 104 | 106 | 167 | 167 | 121 | 123 | 108 | 140 | 0   | 0   |
| ES | 111 | 115 | 103 | 103 | 200 | 206 | 98  | 104 | 167 | 167 | 109 | 115 | 146 | 146 | 112 | 112 |
| ES | 115 | 123 | 103 | 235 | 244 | 340 | 100 | 107 | 165 | 171 | 119 | 134 | 108 | 163 | 112 | 112 |
| ES | 111 | 111 | 103 | 103 | 204 | 285 | 102 | 102 | 165 | 165 | 123 | 125 | 110 | 146 | 110 | 112 |
| ES | 111 | 119 | 103 | 103 | 279 | 383 | 98  | 100 | 157 | 170 | 119 | 125 | 140 | 140 | 112 | 114 |
| ES | 111 | 111 | 103 | 103 | 206 | 207 | 102 | 102 | 167 | 169 | 119 | 123 | 168 | 193 | 112 | 139 |
| ES | 111 | 111 | 103 | 161 | 206 | 209 | 92  | 104 | 165 | 171 | 115 | 121 | 110 | 149 | 112 | 112 |
| ES | 111 | 126 | 103 | 103 | 237 | 324 | 102 | 159 | 167 | 167 | 109 | 119 | 108 | 140 | 112 | 114 |
| ES | 115 | 126 | 103 | 103 | 231 | 317 | 104 | 107 | 167 | 167 | 115 | 125 | 108 | 110 | 112 | 112 |
| ES | 111 | 115 | 103 | 107 | 206 | 360 | 100 | 176 | 165 | 167 | 123 | 130 | 138 | 142 | 112 | 112 |
| ES | 115 | 119 | 102 | 102 | 307 | 347 | 102 | 106 | 162 | 165 | 115 | 127 | 108 | 146 | 112 | 112 |
| ES | 111 | 111 | 105 | 105 | 212 | 311 | 102 | 160 | 165 | 167 | 115 | 134 | 140 | 176 | 112 | 112 |
| ES | 111 | 115 | 103 | 103 | 221 | 291 | 98  | 100 | 157 | 157 | 111 | 140 | 138 | 138 | 112 | 112 |
| ES | 111 | 111 | 107 | 107 | 219 | 309 | 102 | 104 | 165 | 167 | 117 | 121 | 108 | 149 | 112 | 112 |
| ES | 119 | 119 | 0   | 0   | 204 | 287 | 92  | 102 | 165 | 167 | 127 | 130 | 138 | 155 | 112 | 112 |
| ES | 111 | 111 | 109 | 164 | 0   | 0   | 102 | 107 | 165 | 165 | 121 | 130 | 111 | 140 | 112 | 114 |
| ES | 107 | 115 | 98  | 153 | 281 | 360 | 92  | 107 | 165 | 171 | 115 | 119 | 110 | 142 | 112 | 112 |
| ES | 107 | 115 | 142 | 142 | 0   | 0   | 107 | 109 | 157 | 169 | 117 | 125 | 108 | 159 | 112 | 201 |
| ES | 111 | 111 | 107 | 107 | 219 | 309 | 102 | 104 | 165 | 167 | 117 | 121 | 108 | 149 | 112 | 112 |
| ES | 111 | 111 | 103 | 105 | 190 | 299 | 100 | 100 | 167 | 167 | 116 | 130 | 108 | 155 | 112 | 112 |

|    |     |     |     |     |     |     |     |     |     |     |     |     |     |     |     |     |
|----|-----|-----|-----|-----|-----|-----|-----|-----|-----|-----|-----|-----|-----|-----|-----|-----|
| ES | 115 | 115 | 126 | 174 | 321 | 326 | 109 | 109 | 165 | 165 | 113 | 121 | 108 | 140 | 112 | 112 |
| ES | 111 | 126 | 124 | 124 | 315 | 319 | 92  | 102 | 165 | 167 | 121 | 123 | 140 | 140 | 0   | 0   |
| IM | 115 | 119 | 103 | 103 | 237 | 241 | 98  | 102 | 157 | 165 | 115 | 123 | 108 | 108 | 112 | 112 |
| IM | 111 | 111 | 128 | 128 | 229 | 375 | 94  | 106 | 165 | 167 | 115 | 123 | 110 | 140 | 110 | 112 |
| IM | 111 | 111 | 103 | 103 | 206 | 231 | 100 | 104 | 167 | 171 | 121 | 123 | 108 | 108 | 112 | 112 |
| IM | 111 | 115 | 113 | 113 | 192 | 202 | 100 | 104 | 165 | 167 | 140 | 143 | 138 | 140 | 112 | 135 |
| IM | 111 | 111 | 0   | 0   | 221 | 340 | 92  | 102 | 167 | 167 | 119 | 138 | 108 | 138 | 112 | 112 |
| IM | 115 | 115 | 103 | 103 | 202 | 206 | 102 | 106 | 165 | 165 | 119 | 127 | 140 | 149 | 112 | 112 |
| IM | 111 | 126 | 103 | 115 | 202 | 345 | 102 | 102 | 171 | 171 | 119 | 127 | 108 | 142 | 114 | 247 |
| IM | 115 | 115 | 103 | 107 | 202 | 206 | 102 | 106 | 165 | 165 | 119 | 127 | 140 | 149 | 112 | 112 |
| IM | 111 | 115 | 128 | 130 | 209 | 221 | 100 | 281 | 165 | 167 | 117 | 119 | 108 | 136 | 0   | 0   |
| IM | 111 | 126 | 103 | 130 | 222 | 332 | 102 | 104 | 165 | 165 | 115 | 127 | 108 | 165 | 112 | 112 |
| IM | 111 | 119 | 103 | 138 | 321 | 321 | 94  | 100 | 165 | 169 | 125 | 136 | 138 | 140 | 112 | 230 |
| IM | 111 | 111 | 103 | 103 | 209 | 215 | 102 | 106 | 165 | 171 | 115 | 116 | 140 | 146 | 112 | 112 |
| IM | 111 | 115 | 103 | 103 | 202 | 221 | 94  | 102 | 167 | 167 | 113 | 119 | 108 | 142 | 112 | 112 |
| IM | 119 | 123 | 142 | 142 | 328 | 330 | 94  | 100 | 169 | 171 | 125 | 132 | 142 | 163 | 112 | 112 |
| IM | 115 | 115 | 103 | 208 | 192 | 208 | 100 | 102 | 167 | 171 | 130 | 132 | 108 | 165 | 0   | 0   |
| IM | 111 | 111 | 103 | 103 | 340 | 340 | 100 | 102 | 165 | 165 | 119 | 132 | 108 | 136 | 112 | 112 |
| IM | 111 | 115 | 166 | 166 | 217 | 330 | 102 | 113 | 165 | 171 | 115 | 125 | 142 | 189 | 112 | 112 |
| IM | 111 | 119 | 103 | 103 | 200 | 326 | 104 | 109 | 171 | 171 | 119 | 119 | 108 | 140 | 112 | 112 |
| IM | 111 | 111 | 107 | 109 | 330 | 330 | 100 | 102 | 165 | 165 | 127 | 132 | 108 | 108 | 112 | 135 |
| IM | 111 | 126 | 103 | 128 | 246 | 334 | 96  | 98  | 157 | 165 | 119 | 119 | 138 | 140 | 112 | 112 |
| IM | 111 | 119 | 105 | 126 | 206 | 215 | 100 | 102 | 157 | 167 | 125 | 161 | 140 | 142 | 112 | 112 |
| IM | 111 | 115 | 120 | 122 | 223 | 326 | 104 | 106 | 167 | 171 | 115 | 130 | 108 | 108 | 112 | 112 |
| IM | 111 | 119 | 103 | 124 | 312 | 334 | 96  | 102 | 165 | 165 | 116 | 119 | 108 | 140 | 112 | 112 |
| IM | 111 | 115 | 103 | 103 | 291 | 347 | 98  | 102 | 157 | 165 | 115 | 134 | 144 | 186 | 112 | 112 |
| IM | 111 | 115 | 113 | 113 | 209 | 326 | 102 | 107 | 167 | 173 | 121 | 125 | 155 | 170 | 112 | 112 |
| IM | 115 | 119 | 105 | 105 | 360 | 375 | 102 | 140 | 157 | 171 | 121 | 127 | 138 | 140 | 112 | 112 |
| IM | 111 | 111 | 126 | 126 | 209 | 246 | 98  | 219 | 165 | 167 | 119 | 123 | 138 | 142 | 112 | 112 |
| IM | 111 | 111 | 103 | 178 | 207 | 353 | 98  | 102 | 165 | 168 | 115 | 117 | 108 | 140 | 112 | 112 |
| IM | 111 | 111 | 103 | 103 | 328 | 328 | 100 | 102 | 167 | 171 | 130 | 132 | 108 | 155 | 112 | 255 |
| IM | 111 | 111 | 105 | 170 | 202 | 202 | 104 | 106 | 165 | 169 | 119 | 138 | 110 | 142 | 112 | 294 |
| ML | 111 | 111 | 0   | 0   | 330 | 342 | 102 | 109 | 167 | 171 | 119 | 119 | 138 | 138 | 112 | 112 |
| ML | 115 | 119 | 103 | 103 | 317 | 347 | 98  | 100 | 165 | 167 | 109 | 127 | 142 | 168 | 112 | 112 |
| ML | 115 | 126 | 103 | 107 | 237 | 237 | 106 | 109 | 167 | 167 | 119 | 123 | 112 | 140 | 112 | 112 |
| ML | 111 | 111 | 126 | 126 | 192 | 206 | 96  | 142 | 155 | 165 | 132 | 150 | 140 | 144 | 112 | 112 |
| ML | 115 | 119 | 103 | 103 | 344 | 355 | 102 | 104 | 165 | 167 | 115 | 130 | 140 | 166 | 112 | 131 |
| ML | 111 | 111 | 102 | 103 | 377 | 377 | 92  | 100 | 157 | 167 | 117 | 136 | 108 | 138 | 112 | 112 |
| ML | 111 | 115 | 0   | 0   | 219 | 356 | 100 | 104 | 157 | 165 | 109 | 115 | 108 | 174 | 112 | 112 |
| ML | 111 | 119 | 103 | 103 | 231 | 362 | 98  | 102 | 171 | 171 | 119 | 130 | 140 | 153 | 112 | 112 |
| ML | 111 | 111 | 103 | 103 | 229 | 362 | 96  | 102 | 165 | 167 | 119 | 130 | 108 | 138 | 112 | 112 |
| ML | 111 | 115 | 126 | 126 | 202 | 303 | 94  | 104 | 165 | 165 | 127 | 130 | 138 | 142 | 110 | 112 |
| ML | 111 | 115 | 103 | 103 | 207 | 375 | 94  | 106 | 165 | 165 | 119 | 136 | 112 | 144 | 89  | 89  |
| ML | 111 | 111 | 103 | 103 | 207 | 221 | 94  | 102 | 165 | 165 | 134 | 138 | 142 | 142 | 112 | 294 |

|    |     |     |     |     |     |     |     |     |     |     |     |     |     |     |     |     |
|----|-----|-----|-----|-----|-----|-----|-----|-----|-----|-----|-----|-----|-----|-----|-----|-----|
| ML | 111 | 111 | 120 | 122 | 349 | 349 | 94  | 100 | 165 | 167 | 123 | 123 | 108 | 138 | 112 | 112 |
| ML | 111 | 115 | 103 | 103 | 287 | 326 | 96  | 106 | 165 | 171 | 134 | 143 | 138 | 149 | 0   | 0   |
| ML | 111 | 115 | 103 | 103 | 221 | 307 | 92  | 106 | 165 | 167 | 130 | 138 | 108 | 186 | 89  | 112 |
| ML | 115 | 115 | 113 | 113 | 225 | 229 | 98  | 106 | 165 | 167 | 123 | 125 | 140 | 144 | 112 | 112 |
| ML | 111 | 115 | 98  | 98  | 202 | 349 | 98  | 107 | 165 | 169 | 113 | 123 | 138 | 146 | 112 | 112 |
| ML | 111 | 119 | 164 | 164 | 194 | 306 | 104 | 164 | 165 | 169 | 121 | 123 | 110 | 112 | 112 | 112 |
| ML | 111 | 115 | 103 | 105 | 215 | 309 | 102 | 104 | 165 | 165 | 119 | 121 | 108 | 180 | 112 | 112 |
| ML | 111 | 115 | 208 | 208 | 204 | 351 | 106 | 111 | 165 | 167 | 119 | 119 | 108 | 166 | 112 | 237 |
| ML | 111 | 119 | 105 | 105 | 200 | 319 | 106 | 107 | 165 | 165 | 119 | 134 | 138 | 153 | 112 | 112 |
| ML | 111 | 119 | 103 | 103 | 207 | 345 | 100 | 104 | 165 | 167 | 117 | 123 | 140 | 163 | 112 | 112 |
| ML | 111 | 126 | 126 | 126 | 345 | 383 | 100 | 104 | 157 | 167 | 115 | 127 | 138 | 149 | 112 | 114 |
| ML | 111 | 115 | 103 | 126 | 232 | 279 | 102 | 106 | 165 | 167 | 115 | 134 | 101 | 138 | 112 | 135 |
| ML | 107 | 111 | 193 | 193 | 353 | 383 | 96  | 102 | 173 | 173 | 134 | 136 | 138 | 140 | 89  | 112 |
| ML | 115 | 119 | 151 | 151 | 230 | 237 | 98  | 203 | 177 | 177 | 115 | 117 | 142 | 172 | 112 | 112 |
| ML | 111 | 115 | 102 | 102 | 198 | 217 | 102 | 102 | 167 | 171 | 115 | 121 | 108 | 108 | 112 | 112 |
| ML | 115 | 119 | 98  | 98  | 206 | 213 | 102 | 106 | 165 | 171 | 119 | 119 | 108 | 140 | 112 | 112 |
| ML | 111 | 115 | 103 | 103 | 206 | 315 | 94  | 106 | 167 | 172 | 115 | 125 | 138 | 252 | 112 | 112 |
| ML | 111 | 111 | 103 | 103 | 202 | 219 | 98  | 102 | 163 | 171 | 123 | 125 | 108 | 138 | 112 | 112 |
| TT | 111 | 115 | 103 | 103 | 223 | 226 | 100 | 102 | 157 | 173 | 123 | 140 | 108 | 155 | 112 | 112 |
| TT | 111 | 119 | 159 | 159 | 207 | 386 | 102 | 104 | 167 | 167 | 119 | 119 | 108 | 140 | 112 | 116 |
| TT | 111 | 115 | 126 | 126 | 315 | 315 | 98  | 109 | 165 | 165 | 115 | 119 | 138 | 146 | 112 | 220 |
| TT | 115 | 119 | 105 | 151 | 330 | 330 | 96  | 106 | 165 | 167 | 127 | 127 | 134 | 151 | 112 | 273 |
| TT | 111 | 111 | 105 | 105 | 202 | 207 | 102 | 102 | 167 | 167 | 121 | 130 | 140 | 146 | 112 | 131 |
| TT | 115 | 115 | 103 | 103 | 230 | 313 | 100 | 102 | 159 | 167 | 127 | 152 | 138 | 138 | 112 | 112 |
| TT | 115 | 115 | 103 | 103 | 215 | 330 | 100 | 106 | 165 | 173 | 115 | 119 | 138 | 138 | 112 | 112 |
| TT | 111 | 111 | 103 | 157 | 221 | 336 | 102 | 111 | 167 | 168 | 117 | 130 | 108 | 142 | 112 | 112 |
| TT | 115 | 119 | 103 | 140 | 215 | 221 | 102 | 104 | 165 | 171 | 113 | 125 | 132 | 138 | 112 | 112 |
| TT | 115 | 119 | 103 | 103 | 211 | 220 | 94  | 100 | 157 | 165 | 115 | 134 | 146 | 186 | 112 | 112 |
| TT | 111 | 111 | 98  | 98  | 289 | 289 | 106 | 109 | 162 | 167 | 125 | 130 | 108 | 138 | 112 | 112 |
| TT | 111 | 115 | 118 | 126 | 351 | 386 | 98  | 104 | 165 | 165 | 127 | 136 | 110 | 138 | 112 | 237 |
| TT | 111 | 115 | 105 | 105 | 221 | 364 | 102 | 104 | 157 | 167 | 115 | 119 | 108 | 138 | 112 | 239 |
| TT | 115 | 126 | 0   | 0   | 229 | 366 | 172 | 191 | 165 | 167 | 115 | 119 | 108 | 170 | 112 | 282 |
| TT | 111 | 115 | 103 | 105 | 213 | 309 | 100 | 104 | 166 | 167 | 119 | 119 | 138 | 140 | 112 | 112 |
| TT | 111 | 115 | 105 | 105 | 190 | 308 | 102 | 104 | 165 | 171 | 113 | 115 | 108 | 178 | 112 | 112 |
| TT | 111 | 119 | 103 | 118 | 292 | 356 | 102 | 106 | 167 | 167 | 115 | 119 | 108 | 140 | 112 | 208 |
| TT | 111 | 111 | 103 | 103 | 206 | 206 | 102 | 106 | 165 | 167 | 115 | 132 | 138 | 138 | 112 | 112 |
| TT | 111 | 111 | 103 | 113 | 202 | 226 | 94  | 109 | 165 | 167 | 119 | 127 | 163 | 184 | 112 | 112 |
| TT | 111 | 126 | 103 | 103 | 231 | 336 | 98  | 102 | 167 | 169 | 115 | 117 | 108 | 108 | 112 | 112 |
| TT | 111 | 115 | 103 | 201 | 206 | 211 | 96  | 102 | 157 | 160 | 119 | 145 | 108 | 138 | 112 | 112 |
| TT | 111 | 111 | 103 | 115 | 321 | 324 | 102 | 106 | 165 | 171 | 119 | 127 | 149 | 151 | 110 | 112 |
| TT | 111 | 111 | 103 | 130 | 215 | 215 | 100 | 102 | 165 | 167 | 119 | 145 | 108 | 155 | 112 | 112 |
| TT | 111 | 119 | 98  | 98  | 204 | 356 | 98  | 102 | 158 | 177 | 115 | 123 | 142 | 170 | 112 | 112 |
| TT | 115 | 115 | 98  | 103 | 332 | 340 | 102 | 109 | 165 | 171 | 127 | 130 | 108 | 140 | 112 | 131 |
| TT | 111 | 119 | 113 | 113 | 255 | 326 | 102 | 109 | 165 | 171 | 123 | 125 | 108 | 166 | 112 | 112 |

|    |     |     |     |     |     |     |     |     |     |     |     |     |     |     |     |     |
|----|-----|-----|-----|-----|-----|-----|-----|-----|-----|-----|-----|-----|-----|-----|-----|-----|
| TT | 111 | 111 | 113 | 113 | 351 | 425 | 94  | 104 | 167 | 167 | 121 | 130 | 140 | 159 | 112 | 112 |
| TT | 111 | 115 | 103 | 103 | 198 | 236 | 100 | 109 | 171 | 175 | 115 | 117 | 108 | 140 | 112 | 112 |
| TT | 115 | 119 | 189 | 189 | 326 | 379 | 102 | 106 | 157 | 169 | 123 | 132 | 140 | 146 | 112 | 112 |
| TT | 111 | 119 | 103 | 103 | 230 | 281 | 100 | 104 | 166 | 167 | 125 | 134 | 138 | 144 | 112 | 112 |
| BJ | 115 | 115 | 105 | 105 | 213 | 362 | 96  | 96  | 165 | 165 | 127 | 130 | 142 | 182 | 112 | 112 |
| BJ | 115 | 115 | 142 | 142 | 226 | 371 | 102 | 102 | 167 | 167 | 121 | 130 | 140 | 151 | 112 | 112 |
| BJ | 107 | 111 | 105 | 136 | 336 | 340 | 106 | 109 | 167 | 167 | 115 | 132 | 107 | 138 | 110 | 112 |
| BJ | 111 | 115 | 0   | 0   | 200 | 207 | 104 | 107 | 165 | 165 | 115 | 115 | 108 | 138 | 89  | 112 |
| BJ | 111 | 119 | 0   | 0   | 202 | 209 | 98  | 100 | 165 | 167 | 115 | 127 | 108 | 108 | 112 | 112 |
| BJ | 115 | 126 | 105 | 105 | 333 | 360 | 98  | 100 | 163 | 163 | 115 | 145 | 138 | 157 | 89  | 112 |
| BJ | 111 | 115 | 124 | 124 | 296 | 296 | 106 | 107 | 157 | 157 | 115 | 119 | 108 | 182 | 112 | 112 |
| BJ | 111 | 119 | 103 | 159 | 200 | 321 | 96  | 102 | 157 | 157 | 115 | 119 | 108 | 108 | 114 | 259 |
| BJ | 111 | 111 | 178 | 195 | 356 | 375 | 102 | 172 | 165 | 165 | 119 | 125 | 108 | 236 | 112 | 112 |
| BJ | 111 | 115 | 113 | 113 | 202 | 342 | 100 | 102 | 165 | 165 | 115 | 121 | 140 | 140 | 112 | 265 |
| BJ | 115 | 115 | 103 | 120 | 330 | 334 | 92  | 96  | 157 | 165 | 115 | 125 | 108 | 155 | 112 | 112 |
| BJ | 111 | 115 | 103 | 103 | 356 | 356 | 98  | 100 | 165 | 167 | 119 | 123 | 110 | 144 | 112 | 112 |
| BJ | 111 | 111 | 111 | 136 | 355 | 355 | 100 | 102 | 167 | 171 | 0   | 0   | 142 | 189 | 112 | 112 |
| BJ | 111 | 111 | 103 | 117 | 304 | 338 | 104 | 109 | 165 | 167 | 113 | 125 | 108 | 142 | 112 | 112 |
| BJ | 111 | 115 | 124 | 222 | 313 | 390 | 104 | 104 | 0   | 0   | 127 | 127 | 140 | 146 | 0   | 0   |
| BJ | 115 | 115 | 103 | 105 | 309 | 317 | 98  | 102 | 163 | 171 | 115 | 123 | 163 | 172 | 112 | 249 |
| BJ | 111 | 119 | 103 | 103 | 188 | 340 | 94  | 104 | 157 | 171 | 123 | 125 | 108 | 144 | 0   | 0   |
| BJ | 111 | 112 | 105 | 138 | 207 | 287 | 96  | 102 | 157 | 165 | 115 | 130 | 108 | 138 | 112 | 112 |
| BJ | 115 | 115 | 0   | 0   | 217 | 219 | 100 | 100 | 167 | 167 | 117 | 130 | 108 | 134 | 95  | 112 |
| BJ | 111 | 115 | 103 | 103 | 309 | 309 | 98  | 102 | 165 | 167 | 115 | 115 | 108 | 171 | 112 | 112 |
| BJ | 111 | 115 | 115 | 120 | 200 | 217 | 92  | 96  | 165 | 171 | 115 | 130 | 110 | 157 | 112 | 112 |
| BJ | 111 | 115 | 193 | 193 | 206 | 364 | 96  | 109 | 158 | 165 | 117 | 125 | 108 | 140 | 112 | 114 |
| BJ | 111 | 115 | 120 | 120 | 190 | 340 | 102 | 106 | 165 | 167 | 109 | 121 | 110 | 140 | 112 | 118 |
| BJ | 111 | 111 | 0   | 0   | 200 | 207 | 104 | 201 | 155 | 157 | 125 | 130 | 110 | 187 | 112 | 112 |
| BJ | 115 | 119 | 98  | 98  | 200 | 200 | 100 | 102 | 165 | 167 | 127 | 132 | 138 | 155 | 112 | 112 |
| BJ | 111 | 119 | 103 | 107 | 355 | 355 | 98  | 106 | 165 | 175 | 115 | 134 | 142 | 153 | 112 | 112 |
| BJ | 115 | 115 | 118 | 193 | 342 | 342 | 98  | 100 | 167 | 175 | 119 | 143 | 140 | 161 | 112 | 114 |
| BJ | 111 | 115 | 105 | 105 | 289 | 289 | 102 | 102 | 165 | 168 | 115 | 127 | 108 | 110 | 110 | 112 |
| BJ | 111 | 119 | 103 | 103 | 315 | 356 | 104 | 106 | 159 | 165 | 115 | 132 | 108 | 151 | 112 | 116 |
| BJ | 115 | 115 | 105 | 118 | 202 | 329 | 100 | 106 | 165 | 167 | 119 | 121 | 108 | 144 | 112 | 114 |
| LB | 115 | 115 | 103 | 103 | 321 | 353 | 92  | 104 | 158 | 171 | 123 | 125 | 163 | 165 | 112 | 112 |
| LB | 111 | 111 | 105 | 105 | 209 | 334 | 102 | 109 | 165 | 167 | 115 | 125 | 108 | 110 | 112 | 112 |
| LB | 115 | 119 | 103 | 103 | 358 | 358 | 100 | 100 | 167 | 167 | 119 | 125 | 138 | 138 | 112 | 112 |
| LB | 111 | 115 | 105 | 113 | 200 | 206 | 100 | 102 | 165 | 173 | 119 | 127 | 155 | 174 | 112 | 233 |
| LB | 111 | 111 | 0   | 0   | 209 | 362 | 96  | 98  | 167 | 171 | 127 | 127 | 108 | 144 | 0   | 0   |
| LB | 115 | 115 | 109 | 109 | 206 | 206 | 98  | 100 | 165 | 167 | 115 | 130 | 108 | 108 | 112 | 112 |
| LB | 111 | 115 | 98  | 111 | 230 | 375 | 102 | 102 | 167 | 167 | 119 | 134 | 140 | 142 | 110 | 112 |
| LB | 111 | 119 | 103 | 103 | 200 | 383 | 98  | 104 | 165 | 165 | 115 | 121 | 138 | 142 | 0   | 0   |
| LB | 111 | 126 | 103 | 122 | 204 | 328 | 98  | 104 | 167 | 169 | 113 | 123 | 108 | 140 | 112 | 112 |
| LB | 111 | 115 | 103 | 103 | 200 | 207 | 98  | 106 | 167 | 167 | 115 | 119 | 140 | 153 | 112 | 114 |

|    |     |     |     |     |     |     |     |     |     |     |     |     |     |     |     |     |
|----|-----|-----|-----|-----|-----|-----|-----|-----|-----|-----|-----|-----|-----|-----|-----|-----|
| LB | 111 | 111 | 103 | 103 | 206 | 364 | 98  | 102 | 157 | 165 | 117 | 117 | 108 | 142 | 112 | 112 |
| LB | 115 | 115 | 98  | 103 | 296 | 355 | 102 | 107 | 165 | 167 | 121 | 127 | 108 | 108 | 89  | 112 |
| LB | 111 | 119 | 107 | 122 | 287 | 351 | 187 | 210 | 179 | 179 | 119 | 127 | 140 | 140 | 118 | 118 |
| LB | 115 | 126 | 102 | 195 | 321 | 321 | 102 | 102 | 165 | 167 | 119 | 132 | 108 | 138 | 112 | 112 |
| LB | 111 | 119 | 113 | 113 | 313 | 386 | 102 | 109 | 163 | 165 | 125 | 132 | 108 | 149 | 112 | 114 |
| LB | 115 | 126 | 103 | 161 | 283 | 353 | 98  | 106 | 165 | 167 | 115 | 115 | 110 | 110 | 112 | 112 |
| LB | 111 | 115 | 103 | 151 | 226 | 371 | 102 | 109 | 170 | 171 | 115 | 132 | 110 | 214 | 112 | 112 |
| LB | 111 | 111 | 109 | 109 | 200 | 206 | 104 | 187 | 167 | 173 | 123 | 125 | 136 | 142 | 112 | 112 |
| LB | 115 | 115 | 103 | 103 | 188 | 291 | 102 | 109 | 158 | 170 | 123 | 125 | 140 | 146 | 0   | 0   |
| LB | 111 | 126 | 117 | 117 | 217 | 340 | 102 | 102 | 171 | 171 | 113 | 123 | 140 | 142 | 0   | 0   |
| LB | 119 | 126 | 105 | 105 | 221 | 307 | 102 | 107 | 167 | 167 | 123 | 134 | 138 | 144 | 112 | 112 |
| LB | 115 | 119 | 103 | 103 | 209 | 330 | 100 | 107 | 177 | 177 | 119 | 125 | 108 | 138 | 112 | 208 |
| LB | 111 | 119 | 98  | 134 | 200 | 317 | 102 | 206 | 166 | 167 | 119 | 123 | 108 | 132 | 112 | 112 |
| LB | 115 | 126 | 105 | 105 | 198 | 260 | 100 | 106 | 167 | 171 | 130 | 132 | 108 | 140 | 110 | 112 |
| LB | 111 | 119 | 105 | 105 | 207 | 221 | 102 | 104 | 165 | 175 | 119 | 121 | 108 | 168 | 112 | 135 |
| LB | 111 | 111 | 103 | 103 | 213 | 344 | 100 | 144 | 157 | 167 | 123 | 140 | 140 | 163 | 112 | 112 |
| LB | 111 | 111 | 103 | 103 | 204 | 217 | 98  | 109 | 165 | 167 | 119 | 125 | 108 | 146 | 112 | 112 |
| LB | 111 | 115 | 113 | 113 | 200 | 379 | 100 | 102 | 165 | 165 | 115 | 125 | 107 | 138 | 112 | 112 |
| LB | 111 | 115 | 113 | 113 | 200 | 379 | 100 | 102 | 165 | 165 | 115 | 125 | 107 | 138 | 112 | 112 |
| LB | 111 | 111 | 128 | 128 | 202 | 356 | 98  | 102 | 171 | 185 | 119 | 130 | 138 | 153 | 112 | 112 |
| DK | 111 | 111 | 103 | 103 | 206 | 206 | 102 | 104 | 165 | 165 | 115 | 119 | 110 | 174 | 110 | 112 |
| DK | 111 | 111 | 103 | 103 | 299 | 342 | 102 | 102 | 167 | 167 | 136 | 145 | 110 | 140 | 112 | 269 |
| DK | 111 | 115 | 103 | 103 | 207 | 353 | 102 | 102 | 165 | 165 | 115 | 130 | 108 | 108 | 112 | 112 |
| DK | 111 | 115 | 103 | 103 | 207 | 353 | 102 | 102 | 165 | 165 | 115 | 130 | 108 | 108 | 112 | 112 |
| DK | 111 | 111 | 103 | 103 | 206 | 221 | 96  | 96  | 167 | 167 | 119 | 123 | 108 | 110 | 112 | 212 |
| DK | 111 | 126 | 128 | 166 | 203 | 219 | 102 | 102 | 167 | 171 | 125 | 136 | 108 | 110 | 106 | 112 |
| DK | 111 | 111 | 103 | 103 | 217 | 287 | 98  | 109 | 165 | 173 | 119 | 119 | 138 | 153 | 112 | 112 |
| DK | 111 | 111 | 0   | 0   | 190 | 211 | 106 | 132 | 157 | 169 | 119 | 125 | 108 | 155 | 112 | 112 |
| DK | 111 | 111 | 138 | 138 | 215 | 416 | 98  | 203 | 170 | 171 | 121 | 127 | 138 | 153 | 112 | 112 |
| DK | 111 | 111 | 0   | 0   | 311 | 311 | 92  | 104 | 165 | 165 | 117 | 132 | 149 | 151 | 89  | 112 |
| DK | 115 | 119 | 109 | 109 | 202 | 353 | 98  | 101 | 167 | 167 | 115 | 115 | 144 | 172 | 112 | 112 |
| DK | 111 | 115 | 118 | 118 | 215 | 375 | 102 | 104 | 167 | 171 | 119 | 119 | 108 | 108 | 112 | 112 |
| DK | 111 | 115 | 98  | 102 | 206 | 345 | 98  | 104 | 165 | 167 | 119 | 134 | 108 | 155 | 89  | 112 |
| DK | 111 | 115 | 103 | 103 | 231 | 344 | 104 | 106 | 160 | 167 | 119 | 127 | 108 | 138 | 112 | 112 |
| DK | 111 | 115 | 113 | 113 | 204 | 315 | 96  | 102 | 167 | 167 | 113 | 123 | 138 | 142 | 112 | 112 |
| DK | 111 | 111 | 103 | 128 | 204 | 340 | 102 | 107 | 167 | 171 | 115 | 121 | 108 | 146 | 112 | 112 |
| DK | 111 | 126 | 103 | 103 | 233 | 336 | 100 | 104 | 165 | 169 | 115 | 121 | 108 | 140 | 112 | 112 |
| DK | 111 | 115 | 105 | 107 | 313 | 315 | 92  | 102 | 167 | 169 | 113 | 123 | 108 | 138 | 112 | 112 |
| DK | 115 | 115 | 103 | 103 | 204 | 349 | 102 | 106 | 167 | 167 | 123 | 127 | 108 | 138 | 112 | 112 |
| DK | 115 | 119 | 120 | 120 | 321 | 358 | 100 | 104 | 165 | 165 | 115 | 125 | 138 | 144 | 112 | 249 |
| DK | 107 | 111 | 103 | 103 | 204 | 317 | 104 | 104 | 167 | 167 | 119 | 123 | 140 | 163 | 112 | 237 |
| DK | 111 | 111 | 103 | 115 | 304 | 364 | 102 | 102 | 167 | 177 | 115 | 115 | 138 | 174 | 112 | 112 |
| DK | 111 | 119 | 103 | 103 | 231 | 410 | 98  | 109 | 165 | 165 | 115 | 115 | 138 | 149 | 112 | 112 |
| DK | 111 | 112 | 103 | 122 | 318 | 326 | 102 | 102 | 158 | 165 | 130 | 148 | 108 | 108 | 112 | 114 |

|    |     |     |     |     |     |     |     |     |     |     |     |     |     |     |     |     |
|----|-----|-----|-----|-----|-----|-----|-----|-----|-----|-----|-----|-----|-----|-----|-----|-----|
| DK | 111 | 119 | 92  | 92  | 237 | 347 | 106 | 107 | 157 | 165 | 117 | 125 | 108 | 157 | 112 | 112 |
| DK | 115 | 119 | 103 | 105 | 213 | 336 | 102 | 102 | 157 | 167 | 115 | 119 | 140 | 151 | 89  | 112 |
| DK | 115 | 119 | 103 | 103 | 213 | 336 | 102 | 102 | 157 | 167 | 115 | 119 | 140 | 151 | 89  | 112 |
| DK | 111 | 115 | 0   | 0   | 206 | 360 | 104 | 182 | 163 | 167 | 116 | 123 | 108 | 146 | 112 | 112 |
| DK | 115 | 126 | 103 | 124 | 236 | 347 | 102 | 106 | 165 | 165 | 115 | 132 | 138 | 142 | 112 | 112 |
| DK | 111 | 119 | 126 | 126 | 206 | 206 | 94  | 102 | 167 | 169 | 115 | 118 | 108 | 146 | 112 | 112 |

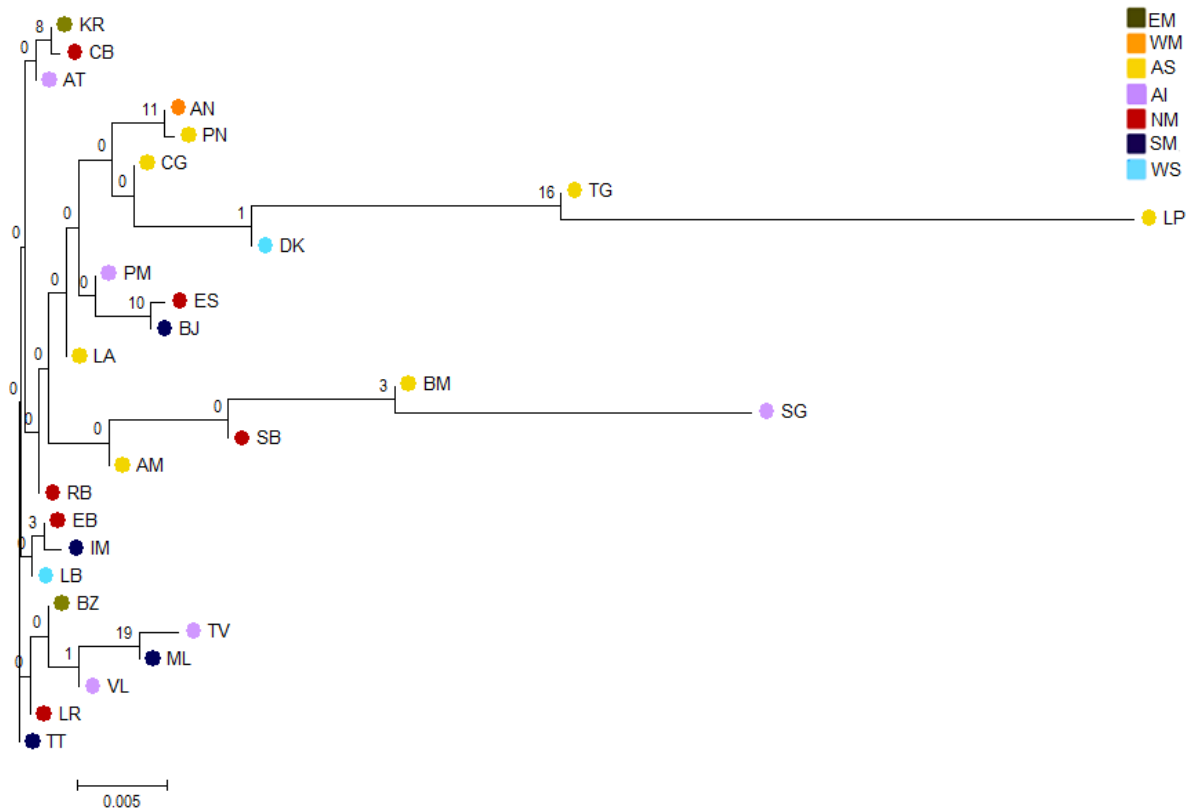

Figure S1 – Unrooted neighbour-joining tree of the pairwise genetic distance between populations of *P. perna* across northeastern Atlantic and Mediterranean shores based on proportion of shared alleles of 7 microsatellite loci, running 999 bootstraps. Colours depict distinct expected oceanographic regions. Numbers above branches correspond to bootstrap support. EM, Eastern Mediterranean; WM, Western Mediterranean; AS, Alboran Sea; AI, Atlantic Iberia; NM, northwestern Morocco; SM, Southern Morocco; WS, Western Sahara. Locations codes as in Table S6.

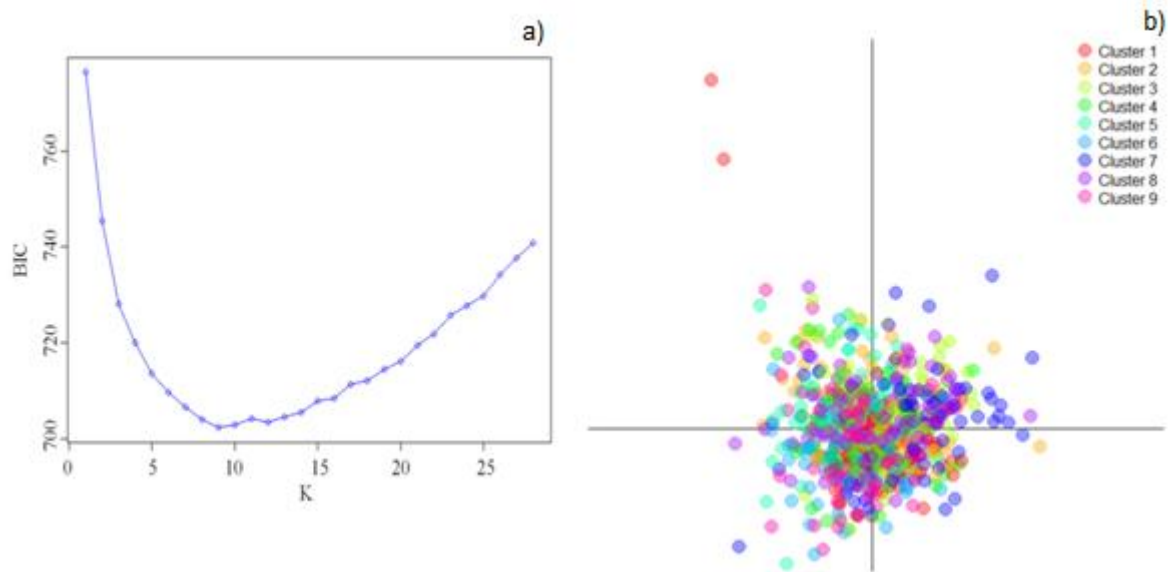

Figure S2 – Discriminant analyses of principal components (DAPC) results. a) Selection of best fitting number of clusters, K (K=9) based on Bayesian Information Criterion (BIC), b) DAPC spatial plot of the 27 populations distributed through nine clusters. Colours correspond to distinct clusters. Each individual was assigned to a cluster and solid dots correspond to the overlapping of several individuals.

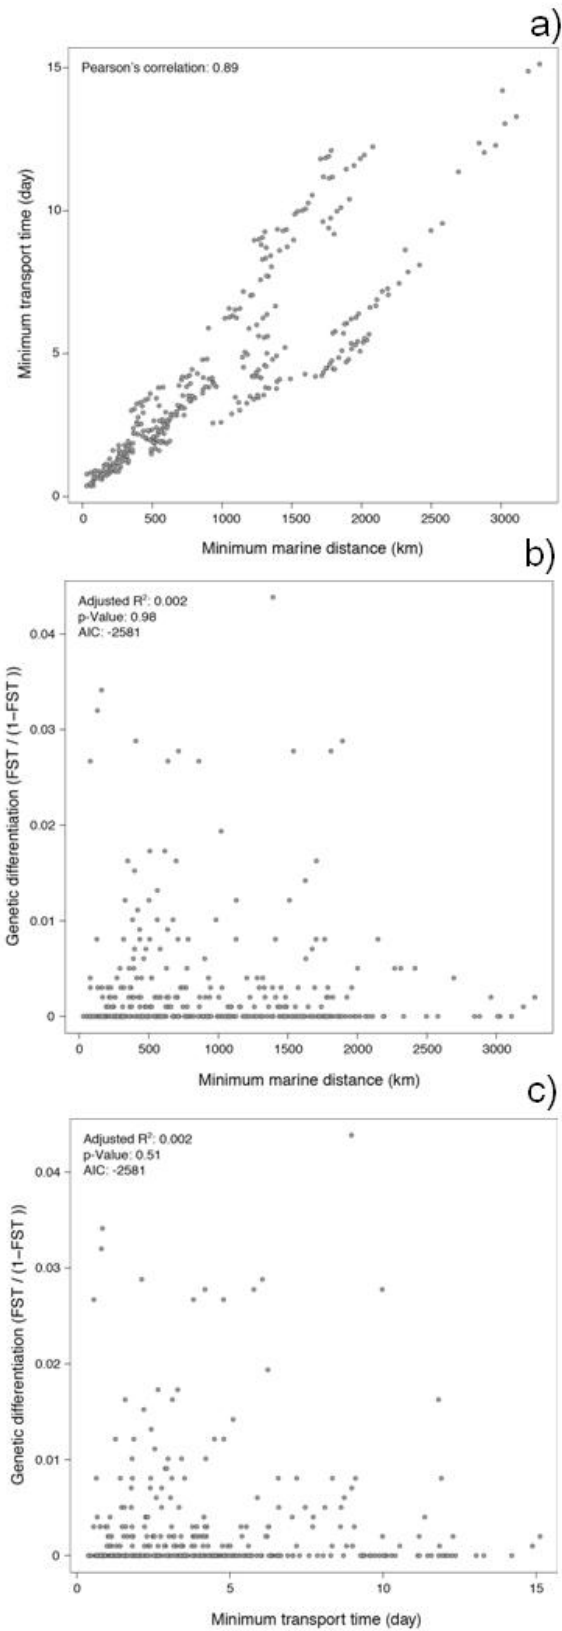

Figure S3 – Dispersal simulation of *P. perna* larvae. a) Correlation between minimum transport time (day) and minimum marine distance (km); Correlation between genetic differentiation and b) minimum marine distance (km) and c) minimum transport time (days).



## References

- 1 Boudoresque, C. F., J.G., H. & de Grissac, J. Le benthos marin de l'île de zembra (*Parc National, Tunisie*). (GIS Posidonie, 1986).
- 2 Belabed, B. E. *et al.* Factors contributing to heavy metal accumulation in sediments and in the intertidal mussel *Perna perna* in the Gulf of Annaba (Algeria). *Mar. Pollut. Bull.* **74**, 477-489, doi:10.1016/j.marpolbul.2013.06.004 (2013).
- 3 Abada-Boudjema, Y.-M. & Davin, J.-C. Recruitment and life span of two natural mussel populations *Perna perna* (Linnaeus) and *Mytilus galloprovincialis* (Lamarck) from the Algerian coast. *J. Molluscan Stud.* **61**, 467-481 (1995).
- 4 Klouche, M. S., De Deurwaerdère, P., Dellu-Hagedorn, F., Lakhdar-Ghazal, N. & Benomar, S. Monoamine content during the reproductive cycle of *Perna perna* depends on site of origin on the Atlantic Coast of Morocco. *Sci. Rep.* **5**, 13715, doi:10.1038/srep13715 (2015).
- 5 Jourmi, L. E. *et al.* Assessment of water quality in coastal environments of mohammedia applying responses of biochemical biomarkers in the brown mussel *Perna perna*. *IJCSI Int. J. Comp. Sci.* **9**, 505-510 (2012).
- 6 Mhamada, M., Cheihk, M. O. M., Khannous, S., Dartige, A. & Hassan, E.-R. Metallic contamination assessment of the Lévrier Bay (Mauritanian Atlantic coast), using *Perna perna* and *Venus rosalina*. *J. Env. Sol.* **3**, 1-10 (2015).
- 7 Roméo, M., Sidoumou, Z. & Gnassia-Barelli, M. Heavy metals in various molluscs from the Mauritanian coast. *Bull. Environ. Contam. Toxicol.* **65**, 269-276, doi:10.1007/s001280000124 (2000).
- 8 Sidoumou, Z., Gnassia-Barelli, M., Siau, Y., Morton, V. & Romeo, M. Heavy metal concentrations in molluscs from the Senegal coast. *Environ. Int.* **32**, 384-387, doi:10.1016/j.envint.2005.09.001 (2006).
- 9 Zabi, S. G. Répartition et abondance des espèces de la macrofaune benthique de la lagune Ebrié (Côte d'Ivoire). *Document Scientifique du Centre de Recherche Océanographique, Abidjan* **13** (1982).
- 10 Otchere, F. A., Joiris, C. R. & Holsbeek, L. Mercury in the bivalves *Anadara (Senilia) senilis*, *Perna perna* and *Crassostrea tulipa* from Ghana. *Sci. Total Environ.* **304**, 369-375, doi:10.1016/S0048-9697(02)00582-X (2003).
- 11 Cayré, P. Étude de la moule *Perna perna* L. et des possibilités de Myticulture en République Populaire du Congo. *Cahiers ORSTOM. Serie Oceanographie* **16**, 9-17 (1978).
- 12 Sokołowski, A., Bawazir, A. S., Sokołowska, E. & Wołowicz, M. Seasonal variation in the reproductive activity, physiological condition and biochemical components of the brown mussel *Perna perna* from the coastal waters of Yemen (Gulf of Aden). *Aquat. Living Resour.* **23**, 177-186, doi:10.1051/alr/2010016 (2010).
- 13 Szefer, P. & Geldon, J. Distribution and association of trace metals in soft tissue and byssus of mollusc *Perna perna* from the Gulf of Aden, Yemen. *Environ. Int.* **23**, 53-61 (1997).
- 14 Badawy, M. I. & Al-Harthy, F. Hydrocarbons in seawater, sediment, and oyster from the Omani coastal waters. *Bull. Environ. Contam. Toxicol.* **47**, 386-391 (1991).
- 15 Cunha, R. L. *et al.* Wider sampling reveals a non-sister relationship for geographically contiguous lineages of a marine mussel. *Ecol. Evol.* **4**, 2070-2081, doi:10.1002/ece3.1033 (2014).
